# Supplementary material for: A sustainable byproduct catalyzed domino strategy: facile synthesis of α-formyloxy and acetoxy ketones via iodination/nucleophilic substitution/hydrolyzation/oxidation sequences
Source: Royal Society of Chemistry journal article supplement (doi:10.1039/c1cc15819h), 2011-01-01

## Supporting Information available

### Sustainable Byproduct Catalyzed Domino Strategy: Facile Synthesis of $\alpha$ - formyloxy and Acetoxy Ketones via Iodination/Nucleophilic Substitution/Hydrolyzation/Oxidation Sequences

Yan-Ping Zhu, Qing-He Gao, Mi Lian, Jing-Jing Yuan, Mei-Cai Liu, Qin Zhao, Yan  
Yang, An-Xin Wu\*

Key Laboratory of Pesticide & Chemical Biology, Ministry of Education, Central China Normal  
University, Wuhan 430079, P. R. China

E-mail: chwuax@mail.ccnu.edu.cn

| Table of Contents                                                                  | Pages   |
|------------------------------------------------------------------------------------|---------|
| 1. General.....                                                                    | S2      |
| 2. Synthesis of <b>3a-3m</b> , <b>5a-5f</b> .....                                  | S2      |
| 3. Evidence in support of the hypothetic<br>mechanism.....                         | S2-S5   |
| 4. Crystallographic data and molecular structure.....                              | S5-S6   |
| 5. Spectral data of compound <b>3a-3m</b> , <b>5a-5f</b> .....                     | S6-S12  |
| 6. Appendix: spectral copies of $^1\text{H}$ NMR, and $^{13}\text{C}$<br>NMR ..... | S12-S48 |

## 1. General

All aryl methyl ketones (**1a-1n**), and other reagents were obtained from commercial suppliers and used without further purification. TLC analysis was performed using pre-coated glass plates. Column chromatography was performed using silica gel (200-300 mesh). IR spectra were recorded on a Perkin-Elmer PE-983 infrared spectrometer as KBr pellets with absorption in  $\text{cm}^{-1}$ .  $^1\text{H}$  NMR spectra were recorded on a Varian Mercury 400 or 600 MHz spectrometer. Chemical shifts are reported in ppm, relative to the internal standard of tetramethylsilane (TMS). HRMS were obtained on a Bruker 7-tesla FT-ICR MS equipped with an electrospray source. The X-ray crystal-structure determinations of **2e** and **3d** were obtained on a Bruker SMART APEX CCD system. Melting points were determined using XT-4 apparatus and not corrected.

## 2. Synthesis of 2a-2x, 3a-3m

### 2.1. General procedure for preparation of 2 and 3 (**2b** as an example)

A mixture of benzalacetone **1b** (120 mg, 1 mmol), iodine (254 mg, 1.0 mmol), and CuO (80 mg, 1.0 mmol) in common DMF (3.0 mL) was heated at 110 °C for 1 h, after disappearance of the reactant (monitored by TLC), and added 50mL water to the residue, then extracted with EtOAc 3 times ( $3 \times 50\text{mL}$ ). The extract was washed with 10%  $\text{Na}_2\text{S}_2\text{O}_3$ , dried over anhydrous  $\text{Na}_2\text{SO}_4$  and concentrated in vacuo. The residue was purified by column chromatography on silica gel using petroleum ether/EtOAc as the eluent to give the expected products **2b** in 96% yield.

### 3. In order to support the hypothetic mechanism following experiments were carried out.

(a) The reaction process of Acetophenone **1a**, iodine and CuO in DMF at 110 °C:  
The reaction process of acetophenone **1a** (120 mg, 1.0 mmol), iodine (254 mg, 1.0 mmol) and CuO (80 mg, 1.0 mmol) in DMF (6mL) at 110°C was monitored by  $^1\text{H}$  NMR (400 MHz,  $\text{CDCl}_3$ , 298 K) over time.

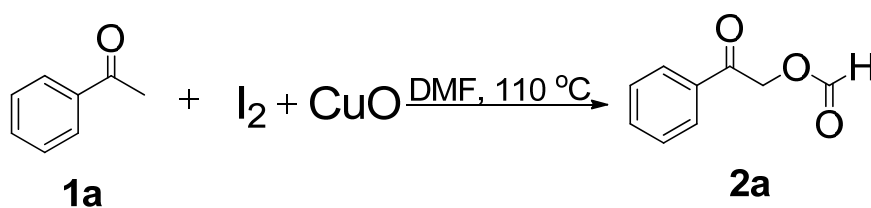

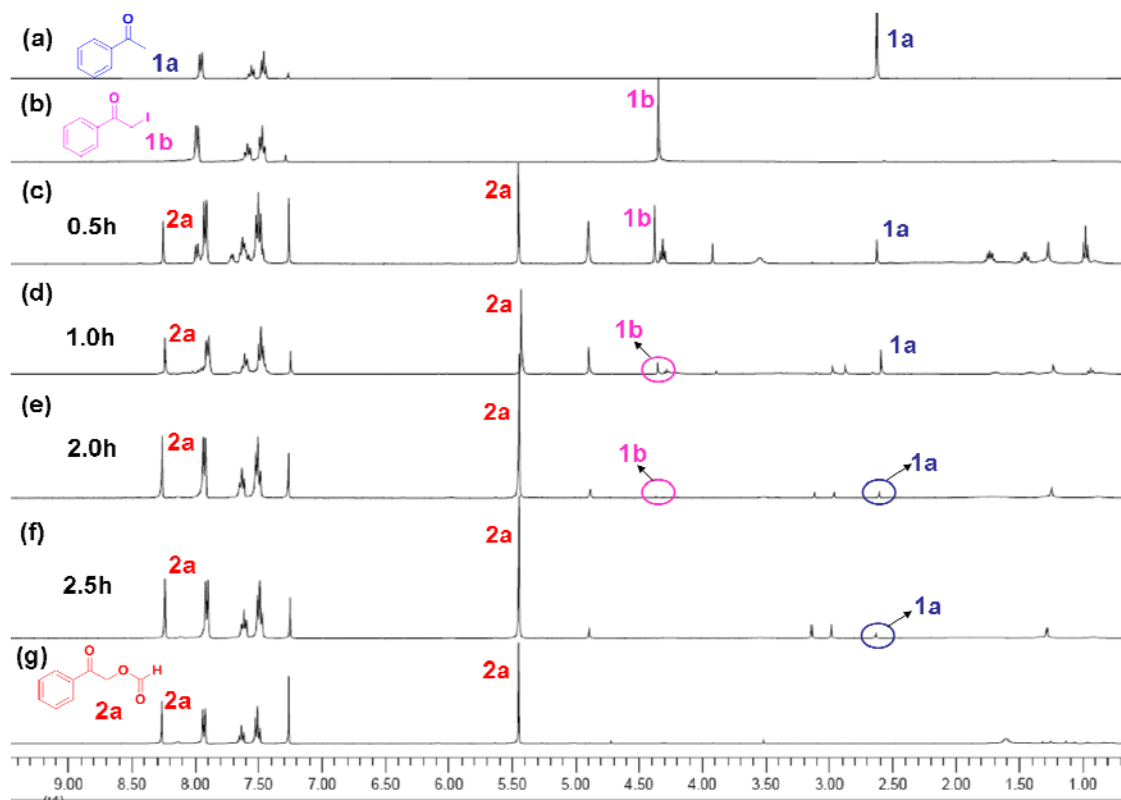

(b) A mixture of phenacyl iodide (246 mg, 1.0 mmol), I<sub>2</sub> (253.81 mg, 1.0 mmol), and CuO (80 mg, 1.0 mmol) in DMF (3-4 mL) was stirred at 110°C for 2 h. After the reaction completed, the reaction mixture was filtered, diluted with water and extracted with EtOAc (3×20 mL). The extract was washed with Na<sub>2</sub>S<sub>2</sub>O<sub>3</sub> (5% w/w, aq.), and brine successively. After drying over Na<sub>2</sub>SO<sub>4</sub> and evaporation, the crude product was purified by column chromatography on silica gel (eluent: petroleum ether/EtOAc) to afford the product 2a (>95% yield) as a yellow oil.

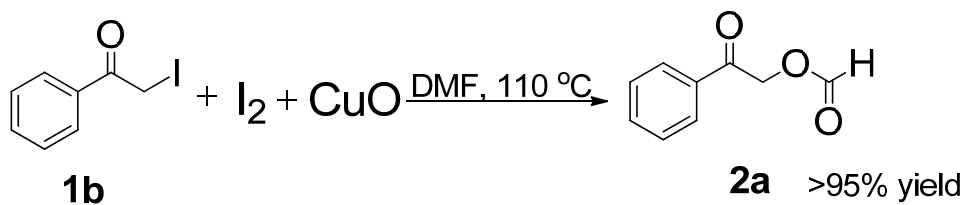

(c) The isotope labeling experiment

1. A mixture of 1-(4-methoxyphenyl)ethanone (150.17 mg, 1.0 mmol), I<sub>2</sub> (253.81 mg, 1.0 mmol), and CuO (80 mg, 1.0 mmol) in DMF (3-4 mL) was stirred at 110°C for 2 h. After the reaction completed, the reaction mixture was filtered, diluted with water and extracted with EtOAc (3×20 mL). The extract was washed with Na<sub>2</sub>S<sub>2</sub>O<sub>3</sub> (5% w/w, aq.), and brine successively. After drying over Na<sub>2</sub>SO<sub>4</sub> and evaporation, the crude product was purified by column chromatography on silica gel (eluent: petroleum ether/EtOAc) to afford the product 2a (>95% yield).

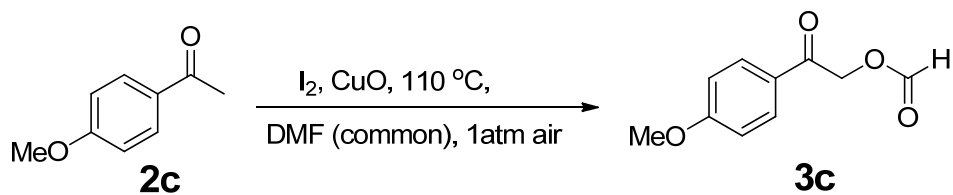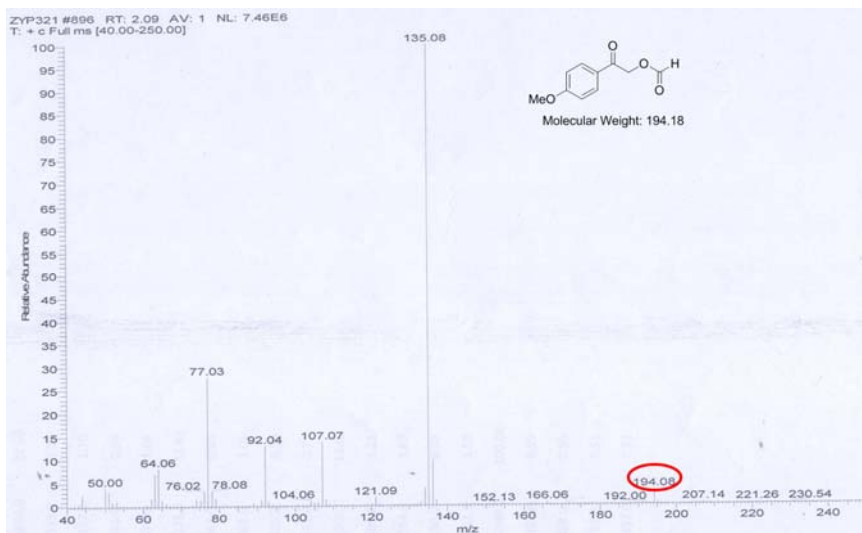

2. A mixture of 1-(4-methoxyphenyl)ethanone (150.17 mg, 1.0 mmol), I<sub>2</sub> (253.81 mg, 1.0 mmol), CuO (80 mg, 1.0 mmol) and 0.15mL H<sub>2</sub>O (O<sup>18</sup>>90%) in anhydrous DMF (3-4 mL) under the Ar atmosphere was stirred at 110°C for 4 h. After the reaction completed, the reaction mixture was filtered, diluted with water and extracted with EtOAc (3×20 mL). The extract was washed with Na<sub>2</sub>S<sub>2</sub>O<sub>3</sub> (5% w/w, aq.), and brine successively. After drying over Na<sub>2</sub>SO<sub>4</sub> and evaporation, the crude product was purified by column chromatography on silica gel (eluent: petroleum ether/EtOAc) to afford the product **3c'** (92% yield)

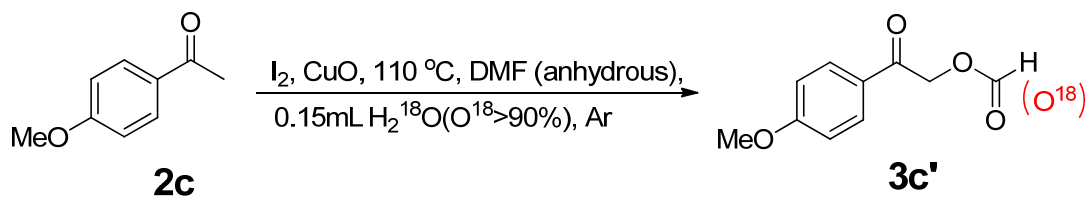

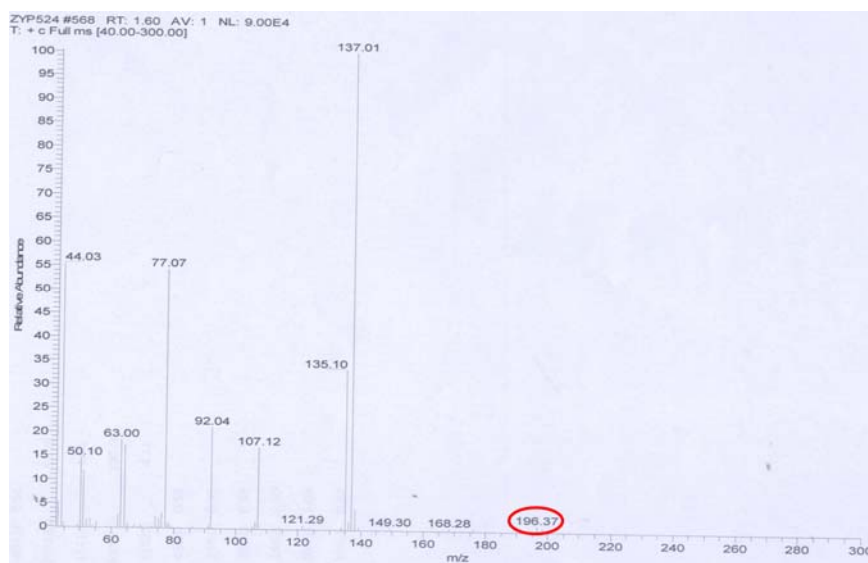

3. A mixture of 4-methoxyphenacyl iodide (246 mg, 1.0 mmol), CuI (190 mg, 1.0 mmol) and 0.15 mL H<sub>2</sub>O (O<sup>18</sup>>90%) in anhydrous DMF (3-4 mL) under the Ar atmosphere was stirred at 110°C for 4 h. After the reaction completed, the reaction mixture was filtered, diluted with water and extracted with EtOAc (3×20 mL). The extract was washed with Na<sub>2</sub>S<sub>2</sub>O<sub>3</sub> (5% w/w, aq.), and brine successively. After drying over Na<sub>2</sub>SO<sub>4</sub> and evaporation, the crude product was purified by column chromatography on silica gel (eluent: petroleum ether/EtOAc) to afford the product 3c'' (>95% yield).

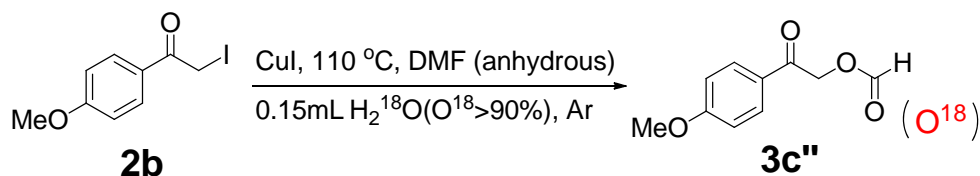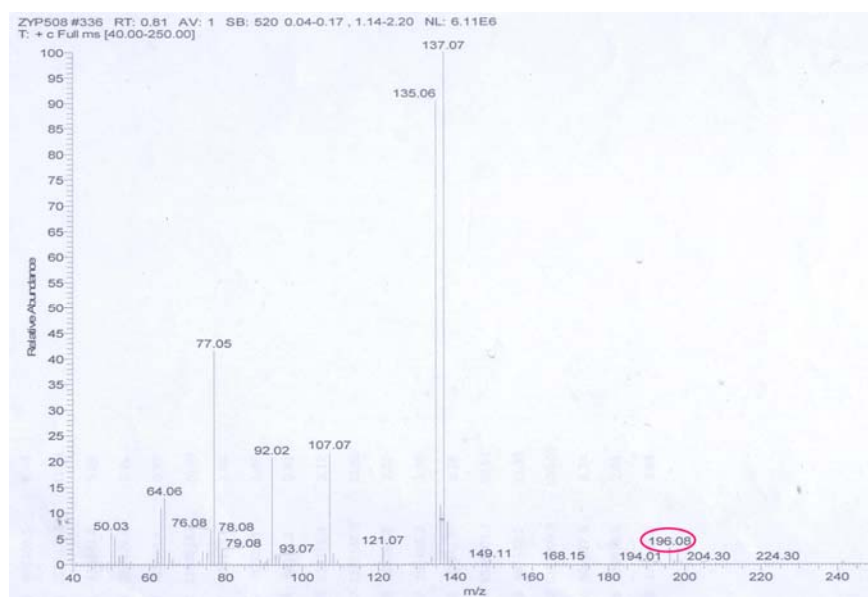

#### 4. Crystallographic data and molecular structure

Crystal structure data for macrocycle **2e**: CCDC 844753.

C<sub>9</sub>H<sub>7</sub>NO<sub>5</sub>, chemical formula weight: 209.16, Orthorhombic space group P2(1)/c,  $a = 9.6790(1)$ ,  $b = 15.1737(15)$ ,  $c = 6.3703(6)$  Å;  $\alpha = 90.00^\circ$ ,  $\beta = 92.00^\circ$ ,  $\gamma = 90.00^\circ$ ,  $U = 927.02(16)$  Å<sup>3</sup>,  $T = 298(2)$  K,  $Z = 4$ ,  $DC = 1.499$  Mg/M<sup>3</sup>,  $\mu = 0.125$  mm<sup>-1</sup>,  $\lambda = 0.71073$  Å,  $F(000) 432$ , crystal size  $0.20 \times 0.10 \times 0.10$  mm<sup>3</sup>, 2289 independent reflections [ $R(\text{int}) = 0.1244$ ], reflections collected 11219, refinement method: full-matrix least-squares on  $F^2$ : goodness-of-fit on  $F^2$  1.049, final R indices [ $I > 2\sigma(I)$ ],  $R1 = 0.1007$ ,  $wR2 = 0.2348$ , largest diff. peak and hole  $0.688\text{Å}^{-3}$  and  $-0.438e\text{Å}^{-3}$ .

Crystal Structure of **2e**

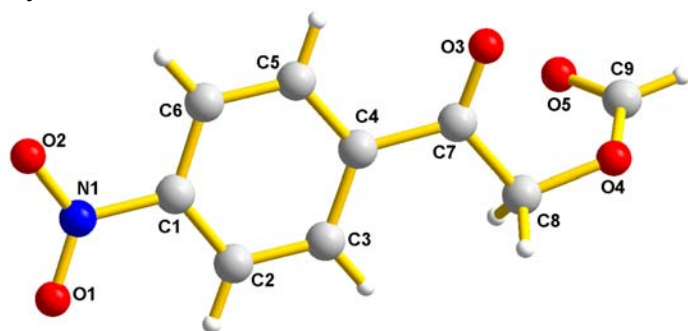

Figure 1 The X-Ray crystal structure of compound **2e**

Crystal structure data for macrocycle **3d**: CCDC 844754.

C<sub>10</sub>H<sub>9</sub>NO<sub>5</sub>, chemical formula weight: 227.69, Orthorhombic space group P2(1)/c,  $a = 9.077(5)$ ,  $b = 12.606(7)$ ,  $c = 9.405(5)$  Å;  $\alpha = 90.00^\circ$ ,  $\beta = 102.097(9)^\circ$ ,  $\gamma = 90.00^\circ$ ,  $U = 1052.3(10)$  Å<sup>3</sup>,  $T = 298(2)$  K,  $Z = 4$ ,  $DC = 1.437$  Mg/M<sup>3</sup>,  $\mu = 0.118$  mm<sup>-1</sup>,  $\lambda = 0.71073$  Å,  $F(000) 474$ , crystal size  $0.20 \times 0.20 \times 0.20$  mm<sup>3</sup>, 1954 independent reflections [ $R(\text{int}) = 0.0300$ ], reflections collected 10229, refinement method: full-matrix least-squares on  $F^2$ : goodness-of-fit on  $F^2$  1.074, final R indices [ $I > 2\sigma(I)$ ],  $R1 = 0.0561$ ,  $wR2 = 0.1588$ , largest diff. peak and hole  $0.318\text{Å}^{-3}$  and  $-0.133e\text{Å}^{-3}$ .

Crystal Structure of **3d**

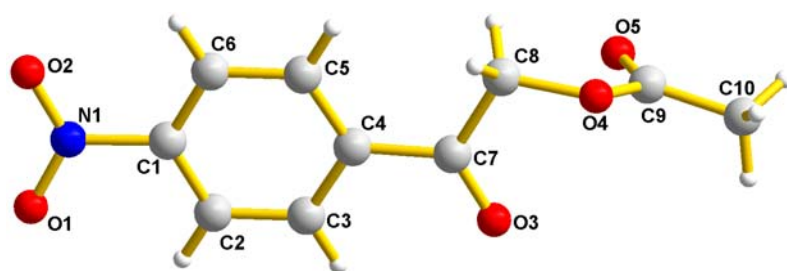

Figure 1 The X-Ray crystal structure of compound **3d**

## 5. Spectral data of compound 3a-3m, 5a-5f

2-oxo-2-phenylethyl formate (**2a**)

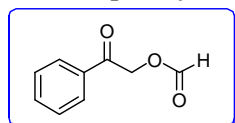

IR (KBr): 3425, 3064, 2933, 1731, 1693, 1598, 1450, 1288, 1234, 1171, 1103 cm<sup>-1</sup>; <sup>1</sup>H NMR (600 MHz, CDCl<sub>3</sub>):  $\delta = 8.26$  (s, 1H), 7.93 (d,  $J = 7.8$  Hz, 2H), 7.61-7.64 (t,  $J = 7.2$  Hz, 1H), 7.49-7.52 (t,  $J = 7.8$  Hz, 2H), 5.44 (s, 2H); <sup>13</sup>C NMR (150 MHz, CDCl<sub>3</sub>):  $\delta = 191.1, 160.0, 134.1, 133.9, 128.9, 127.8, 65.3$ ;

HRMS (ESI):  $m/z$  [ $M + H$ ]<sup>+</sup> calcd for C<sub>9</sub>H<sub>9</sub>O<sub>3</sub>: 165.05369; found: 165.05462.

2-oxo-2-(p-tolyl)ethyl formate (**2b**)

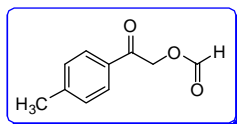

IR (KBr): 3437, 3046, 2951, 1726, 1692, 1606, 1420, 1371, 1281, 1239, 1170, 1012  $\text{cm}^{-1}$ ;  $^1\text{H}$  NMR (600 MHz,  $\text{CDCl}_3$ ):  $\delta$  = 8.25 (s, 1H), 7.82 (d,  $J$  = 7.8 Hz, 2H), 7.28 (d,  $J$  = 7.8 Hz, 2H), 5.41 (s, 2H), 2.42 (s, 3H);  $^{13}\text{C}$  NMR (150 MHz,  $\text{CDCl}_3$ ):  $\delta$  = 190.6, 160.0, 145.0, 131.1, 129.5, 127.8, 65.2, 21.7; HRMS (ESI):

$m/z$   $[\text{M} + \text{H}]^+$  calcd for  $\text{C}_{10}\text{H}_{10}\text{O}_3$ : 179.0703; found: 179.0711.

#### 2-(4-methoxyphenyl)-2-oxoethyl formate (**2c**)

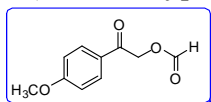

IR (KBr): 3413, 2944, 2847, 1731, 1682, 1601, 1572, 1512, 1464, 1424, 1372, 1316, 1267, 1111, 1014  $\text{cm}^{-1}$ ;  $^1\text{H}$  NMR (600 MHz,  $\text{CDCl}_3$ ):  $\delta$  = 8.25 (s, 1H), 7.89 (d,  $J$  = 7.8 Hz, 2H), 6.95 (d,  $J$  = 7.8 Hz, 2H), 5.40 (s, 2H), 3.87 (s, 3H);  $^{13}\text{C}$

NMR (150 MHz,  $\text{CDCl}_3$ ):  $\delta$  = 189.5, 164.0, 160.1, 130.0, 129.9, 114.0, 65.0, 55.4; HRMS (ESI):  $m/z$   $[\text{M} + \text{H}]^+$  calcd for  $\text{C}_{10}\text{H}_{10}\text{O}_4$ : 195.0652; found: 195.0143.

#### 2-(2,4-dimethoxyphenyl)-2-oxoethyl formate (**2d**)

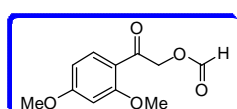

IR (KBr): 3411, 3314, 3097, 2953, 2844, 1729, 1665, 1605, 1478, 1421, 1370, 1336, 1289, 1258, 1219, 1111, 1017  $\text{cm}^{-1}$ ;  $^1\text{H}$  NMR (600 MHz,  $\text{CDCl}_3$ ):  $\delta$  = 8.25 (s, 1H), 8.00 (d,  $J$  = 8.4 Hz, 1H), 6.58 (d,  $J$  = 8.4 Hz, 1H), 6.46 (s, 1H), 3.93 (s, 3H), 3.87 (s, 3H);  $^{13}\text{C}$  NMR (150 MHz,  $\text{CDCl}_3$ ):  $\delta$  = 190.0, 165.6, 161.4, 160.4,

133.2, 117.3, 105.9, 97.9, 69.2, 55.6; HRMS (ESI):  $m/z$   $[\text{M} + \text{H}]^+$  calcd for  $\text{C}_{11}\text{H}_{12}\text{O}_5$ : 225.0757; found: 225.0753.

#### 2-(4-nitrophenyl)-2-oxoethyl formate (**2e**)

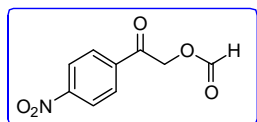

IR (KBr): 3444, 3109, 2949, 1727, 1702, 1605, 1529, 1372, 1348, 1321, 1284, 1226, 1156, 1006  $\text{cm}^{-1}$ ;  $^1\text{H}$  NMR (600 MHz,  $\text{CDCl}_3$ ):  $\delta$  = 8.36 (d,  $J$  = 8.4 Hz, 2H), 8.26 (s, 1H), 8.11 (d,  $J$  = 8.4 Hz, 2H), 5.47 (s, 2H);  $^{13}\text{C}$  NMR (150 MHz,  $\text{CDCl}_3$ ):  $\delta$  = 190.0, 159.8, 150.7, 138.2, 128.9, 124.1, 65.3; HRMS

(ESI):  $m/z$   $[\text{M} + \text{H}]^+$  calcd for  $\text{C}_9\text{H}_7\text{NO}_5$ : 210.0216; found: 210.0404.

#### 2-(4-bromophenyl)-2-oxoethyl formate (**2f**)

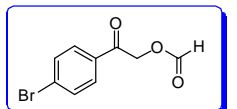

IR (KBr): 3427, 3094, 2945, 1719, 1690, 1585, 1427, 1399, 1283, 1240, 1180, 1070, 1003  $\text{cm}^{-1}$ ;  $^1\text{H}$  NMR (600 MHz,  $\text{CDCl}_3$ ):  $\delta$  = 8.25 (s, 1H), 7.78 (d,  $J$  = 8.4 Hz, 2H), 7.65 (d,  $J$  = 8.4 Hz, 2H), 5.40 (s, 2H);  $^{13}\text{C}$  NMR (150 MHz,  $\text{CDCl}_3$ ):  $\delta$

= 190.2, 159.9, 132.5, 132.3, 129.3, 129.2, 65.1; HRMS (ESI):  $m/z$   $[\text{M} + \text{H}]^+$  calcd for  $\text{C}_9\text{H}_7\text{BrO}_3$ : 290.9627; found: 290.9872.

#### 2-(3,4-dichlorophenyl)-2-oxoethyl formate (**2g**)

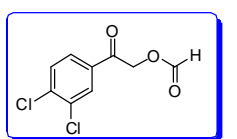

IR (KBr): 3449, 3090, 3011, 2942, 1731, 1696, 1582, 1429, 1398, 1287, 1264, 1223, 1172, 1042  $\text{cm}^{-1}$ ;  $^1\text{H}$  NMR (600 MHz,  $\text{CDCl}_3$ ):  $\delta$  = 8.24 (s, 1H), 8.00 (s, 1H), 7.74 (d,  $J$  = 8.4 Hz, 1H), 7.59 (d,  $J$  = 8.4 Hz, 1H), 5.38 (s, 2H);  $^{13}\text{C}$  NMR (150 MHz,  $d_6$ -DMSO):  $\delta$  = 189.2, 159.8, 138.8, 133.7, 133.3, 131.1, 129.8, 126.7,

65.0; HRMS (ESI):  $m/z$   $[\text{M} + \text{H}]^+$  calcd for  $\text{C}_9\text{H}_6\text{Cl}_2\text{O}_3$ : 234.9767; found: 234.9773.

#### 2-(naphthalen-2-yl)-2-oxoethyl formate (**2h**)

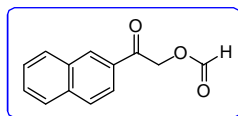

IR (KBr): 3444, 3109, 2949, 1727, 1702, 1605, 1529, 1372, 1348, 1321, 1284, 1226, 1156, 1006  $\text{cm}^{-1}$ ;  $^1\text{H}$  NMR (600 MHz,  $\text{CDCl}_3$ ):  $\delta$  = 8.44 (s, 1H), 8.30 (s, 1H), 7.89-7.99 (m, 4H), 7.63-7.66 (t,  $J$  = 7.8 Hz, 1H), 7.58-7.60 (t,  $J$  = 7.8 Hz,

1H), 5.59 (s, 2H);  $^{13}\text{C}$  NMR (150 MHz,  $\text{CDCl}_3$ ):  $\delta$  = 191.0, 160.1, 135.9, 132.3, 131.2, 129.6, 129.0, 128.9, 127.9, 127.1, 123.2, 65.4; HRMS (ESI):  $m/z$   $[\text{M} + \text{H}]^+$  calcd for  $\text{C}_{13}\text{H}_{10}\text{O}_3$ : 237.0522; found: 237.0520.

#### 2-([1,1'-biphenyl]-4-yl)-2-oxoethyl formate (**2i**)

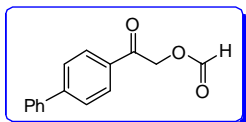

IR (KBr): 3419, 3036, 2943, 1728, 1697, 1604, 1447, 1422, 1402, 1373, 1286, 1237, 1167, 1005  $\text{cm}^{-1}$ ;  $^1\text{H}$  NMR (600 MHz,  $\text{CDCl}_3$ ):  $\delta$  = 8.27 (s, 1H), 7.99 (d,  $J$  = 7.8 Hz, 2H), 7.70 (d,  $J$  = 8.4 Hz, 2H), 7.62 (d,  $J$  = 7.8 Hz, 2H), 7.46-7.49 (t,  $J$  = 7.8 Hz, 2H), 7.40-7.43 (t,  $J$  = 7.8 Hz, 1H), 5.46 (s, 2H);  $^{13}\text{C}$  NMR (150 MHz,  $\text{CDCl}_3$ ):  $\delta$  = 191.6, 160.0, 146.7, 139.4, 132.5, 129.0, 128.4, 127.5, 127.2, 65.3; HRMS (ESI):  $m/z$   $[\text{M} + \text{H}]^+$  calcd for  $\text{C}_{15}\text{H}_{12}\text{O}_3$ : 263.0679; found: 263.0677.

#### 2-(furan-2-yl)-2-oxoethyl acetate (2j)

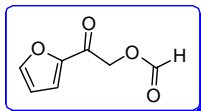

IR (KBr): 3422, 3131, 2929, 2856, 1730, 1688, 1570, 1468, 1399, 1276, 1161, 1021  $\text{cm}^{-1}$ ;  $^1\text{H}$  NMR (600 MHz,  $\text{CDCl}_3$ ):  $\delta$  = 8.23 (s, 1H), 7.65 (d,  $J$  = 1.2 Hz, 1H), 7.31 (d,  $J$  = 3.6 Hz, 1H), 6.60-6.61 (q,  $J$  = 1.8 Hz, 1H), 5.29 (s, 2H);  $^{13}\text{C}$  NMR (150 MHz,  $\text{CDCl}_3$ ):  $\delta$  = 180.5, 159.9, 150.1, 146.9, 117.9, 112.5, 64.4; HRMS (ESI):  $m/z$   $[\text{M} + \text{H}]^+$  calcd for  $\text{C}_7\text{H}_6\text{O}_4$ : 192.9930; found: 192.9979.

#### 2-oxo-2-(thiophen-2-yl)ethyl acetate (2k)

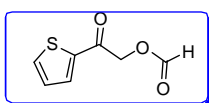

IR (KBr): 3429, 3096, 3001, 2942, 1724, 1671, 1520, 1413, 1387, 1274, 1252, 1194, 1059  $\text{cm}^{-1}$ ;  $^1\text{H}$  NMR (600 MHz,  $\text{CDCl}_3$ ):  $\delta$  = 8.24 (s, 1H), 7.77 (d,  $J$  = 4.2 Hz, 1H), 7.74 (d,  $J$  = 4.2 Hz, 1H), 7.18-7.19 (q,  $J$  = 4.2 Hz, 1H), 5.34 (s, 1H);  $^{13}\text{C}$  NMR (150 MHz,  $\text{CDCl}_3$ ):  $\delta$  = 180.5, 159.9, 150.1, 146.9, 117.9, 112.5, 64.4; HRMS (ESI):  $m/z$   $[\text{M} + \text{H}]^+$  calcd for  $\text{C}_7\text{H}_7\text{SO}_3$ : 171.00996; found: 171.01104.

#### 2-(benzofuran-2-yl)-2-oxoethyl formate (2l)

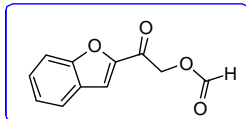

IR (KBr): 3414, 2926, 1723, 1695, 1609, 1562, 1189, 1157, 1138  $\text{cm}^{-1}$ ;  $^1\text{H}$  NMR (600 MHz,  $\text{CDCl}_3$ ):  $\delta$  = 8.26 (s, 1H), 7.72 (d,  $J$  = 7.2 Hz, 1H), 7.61 (d,  $J$  = 7.2 Hz, 1H), 7.57 (d,  $J$  = 7.8 Hz, 1H), 7.50-7.52 (t,  $J$  = 7.2 Hz, 1H), 7.32-7.36 (q,  $J$  = 7.2 Hz, 1H), 5.43 (s, 2H);  $^{13}\text{C}$  NMR (150 MHz,  $\text{CDCl}_3$ ):  $\delta$  = 182.6, 159.9, 155.5, 150.0, 128.8, 126.5, 124.2, 123.5, 113.6, 112.4, 65.0; HRMS (ESI):  $m/z$   $[\text{M} + \text{H}]^+$  calcd for  $\text{C}_{11}\text{H}_9\text{O}_4$ : 205.04858; found: 205.04954.

#### 2-(1H-indol-3-yl)-2-oxoethyl formate (2m)

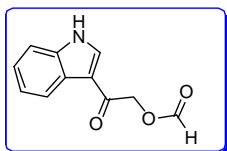

IR (KBr): 3237, 2931, 1729, 1649, 1579, 1520, 1425, 1313, 1238, 1195, 1156  $\text{cm}^{-1}$ ;  $^1\text{H}$  NMR (600 MHz,  $\text{CDCl}_3$ ):  $\delta$  = 8.76 (s, 1H), 8.33 (s, 1H), 8.29 (s, 1H), 7.94 (s, 1H), 7.45 (s, 1H), 7.33 (s, 1H), 5.31 (s, 2H);  $^{13}\text{C}$  NMR (150 MHz,  $d_6$ -DMSO):  $\delta$  = 187.1, 161.9, 136.3, 133.8, 125.3, 123.3, 122.2, 121.2, 112.8, 112.4, 65.5; HRMS (ESI):  $m/z$   $[\text{M} + \text{H}]^+$  calcd for  $\text{C}_{11}\text{H}_9\text{NO}_3$ : 204.0655; found: 204.0653.

#### 2-(4-hydroxyphenyl)-2-oxoethyl formate (2n)

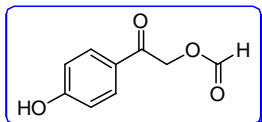

IR (KBr): 3349, 2923, 1727, 1677, 1604, 1577, 1515, 1432, 1370, 1352, 1289, 1250, 1217, 1192, 1168, 1034, 951, 847  $\text{cm}^{-1}$ ;  $^1\text{H}$  NMR (600 MHz, DMSO):  $\delta$  = 10.58 (s, 1H), 8.40 (s, 1H), 7.86 (d,  $J$  = 8.4 Hz, 2H), 6.90 (d,  $J$  = 9.0 Hz, 2H), 5.49 (s, 2H);  $^{13}\text{C}$  NMR (150 MHz,  $d_6$ -DMSO):  $\delta$  = 190.3, 162.6, 161.7, 130.5, 125.4, 115.6, 115.5, 65.6; HRMS (ESI):  $m/z$   $[\text{M} + \text{H}]^+$  calcd for  $\text{C}_9\text{H}_8\text{O}_4$ : 181.0495; found: 181.0501.

#### (E)-2-oxo-4-phenylbut-3-en-1-yl formate (2o)

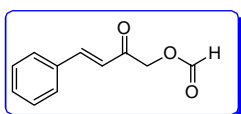

IR (KBr): 3435, 3060, 3029, 2934, 1730, 1685, 1613, 1576, 1495, 1450, 1376, 1332, 1268, 1170, 1091, 1053  $\text{cm}^{-1}$ ;  $^1\text{H}$  NMR (600 MHz,  $\text{CDCl}_3$ ):  $\delta$  = 8.21 (s, 1H), 7.67 (d,  $J$  = 16.2 Hz, 1H), 7.55 (d,  $J$  = 9.0 Hz, 2H), 7.38-7.41 (m, 3H), 6.79 (d,  $J$  = 16.2 Hz, 1H), 5.03 (s, 2H), 2.39 (s, 3H);  $^{13}\text{C}$  NMR (150 MHz,  $\text{CDCl}_3$ ):  $\delta$  = 191.3, 160.0, 144.5, 133.8, 131.1, 129.0, 128.5, 121.1, 66.5; HRMS (ESI):  $m/z$   $[\text{M} + \text{H}]^+$  calcd for  $\text{C}_{12}\text{H}_{12}\text{O}_3$ : 191.0703; found: 191.0865.



**(E)-2-oxo-4-(p-tolyl)but-3-en-1-yl formate (2p)**

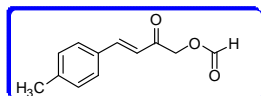

IR (KBr): 3440, 2942, 1728, 1690, 1599, 1511, 1415, 1372, 1270, 1167, 1087, 1037  $\text{cm}^{-1}$ ;  $^1\text{H NMR}$  (600 MHz,  $\text{CDCl}_3$ ):  $\delta$  = 8.23 (s, 1H), 7.65-7.68 (q,  $J$  = 16.2 Hz, 1H), 7.46 (d,  $J$  = 7.8 Hz, 2H), 7.21 (d,  $J$  = 7.8 Hz, 2H), 6.75-6.78 (q,  $J$  = 16.2 Hz, 1H), 5.03 (s, 2H), 2.39 (s, 3H);  $^{13}\text{C NMR}$  (150 MHz,  $\text{CDCl}_3$ ):  $\delta$  = 191.3, 160.0, 144.6, 141.8, 131.1, 129.8, 128.5, 120.1, 66.5, 21.5; HRMS (ESI):  $m/z$   $[\text{M} + \text{Na}]^+$  calcd for  $\text{C}_{12}\text{H}_{12}\text{O}_3$ : 227.0679; found: 227.5765.

**(E)-4-(4-methoxyphenyl)-2-oxobut-3-en-1-yl formate (2q)**

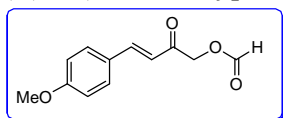

IR (KBr): 3445, 2934, 2837, 1671, 1594, 1511, 1421, 1209, 1254, 1172, 1095, 1025  $\text{cm}^{-1}$ ;  $^1\text{H NMR}$  (400 MHz,  $\text{CDCl}_3$ ):  $\delta$  = 8.15 (s, 1H), 7.58 (d,  $J$  = 15.6 Hz, 1H), 7.45 (d,  $J$  = 8.8 Hz, 2H), 7.85 (d,  $J$  = 8.4 Hz, 2H), 6.61 (d,  $J$  = 16.4 Hz, 1H), 4.96 (d,  $J$  = 8.4 Hz, 2H), 3.79 (s, 3H);  $^{13}\text{C NMR}$  (100 MHz,  $\text{CDCl}_3$ ):  $\delta$  = 191.2, 162.1, 160.0, 144.3, 130.4, 126.5, 118.8, 114.5, 66.6, 55.4; HRMS (ESI):  $m/z$   $[\text{M} + \text{H}]^+$  calcd for  $\text{C}_{12}\text{H}_{12}\text{O}_4$ : 2243.0628; found: 243.0651.

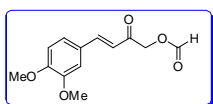

**(E)-4-(3,4-dimethoxyphenyl)-2-oxobut-3-en-1-yl formate (2r)**

IR (KBr): 3417, 2937, 2841, 1716, 1680, 1620, 1594, 1515, 1423, 1268, 1234, 1166, 1139, 1084, 1022  $\text{cm}^{-1}$ ;  $^1\text{H NMR}$  (600 MHz,  $\text{CDCl}_3$ ):  $\delta$  = 8.24 (s, 1H), 7.65 (d,  $J$  = 16.2 Hz, 1H), 7.17 (d,  $J$  = 7.8 Hz, 1H), 7.08 (s, 1H), 6.90 (d,  $J$  = 8.4 Hz, 1H), 6.69 (d,  $J$  = 16.2 Hz, 1H), 5.05 (s, 2H), 3.94 (s, 6H);  $^{13}\text{C NMR}$  (150 MHz,  $\text{CDCl}_3$ ):  $\delta$  = 191.2, 160.0, 151.8, 149.2, 144.6, 126.7, 123.7, 118.9, 111.0, 110.0, 66.5, 55.8; HRMS (ESI):  $m/z$   $[\text{M} + \text{H}]^+$  calcd for  $\text{C}_{13}\text{H}_{15}\text{O}_5$ : 251.09061; found: 251.09140.

**(E)-4-(4-(benzyloxy)-3-methoxyphenyl)-2-oxobut-3-en-1-yl formate (2s)**

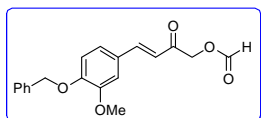

IR (KBr): 3442, 2943, 1724, 1676, 1619, 1593, 1515, 1469, 1425, 1384, 1271, 1235, 1141, 1087, 1034  $\text{cm}^{-1}$ ;  $^1\text{H NMR}$  (600 MHz,  $\text{CDCl}_3$ ):  $\delta$  = 8.21 (s, 1H), 7.61 (d,  $J$  = 16.2 Hz, 1H), 7.38-7.36 (t,  $J$  = 7.2 Hz, 2H), 7.32 (d,  $J$  = 7.2 Hz, 1H), 7.08 (s, 2H), 6.88 (d,  $J$  = 8.4 Hz, 1H), 6.66 (d,  $J$  = 16.2 Hz, 1H), 5.19 (s, 2H), 5.01 (s, 2H), 3.92 (s, 3H);  $^{13}\text{C NMR}$  (150 MHz,  $\text{CDCl}_3$ ):  $\delta$  = 191.1, 159.9, 151.0, 149.7, 144.5, 136.3, 128.6, 128.0, 127.1, 123.3, 119.1, 113.3, 110.4, 70.7, 66.5, 56.0; HRMS (ESI):  $m/z$   $[\text{M} + \text{H}]^+$  calcd for  $\text{C}_{19}\text{H}_{18}\text{O}_5$ : 349.1046; found: 349.1040.

**(E)-4-(4-(dimethylamino)phenyl)-2-oxobut-3-en-1-yl formate (2t)**

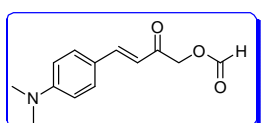

IR (KBr): 3437, 2925, 1725, 1688, 1666, 1580, 1528, 1436, 1370, 1268, 1227, 1173, 1144, 1083  $\text{cm}^{-1}$ ;  $^1\text{H NMR}$  (600 MHz,  $\text{CDCl}_3$ ):  $\delta$  = 8.23 (s, 1H), 7.64 (d,  $J$  = 16.2 Hz, 1H), 7.46 (d,  $J$  = 9.0 Hz, 2H), 6.67 (d,  $J$  = 9.0 Hz, 2H), 6.61 (d,  $J$  = 16.2 Hz, 1H), 5.01 (s, 2H), 3.05 (s, 6H);  $^{13}\text{C NMR}$  (150 MHz,  $\text{CDCl}_3$ ):  $\delta$  = 191.1, 160.1, 152.3, 145.4, 130.6, 121.5, 115.8, 111.8, 66.5, 40.1; HRMS (ESI):  $m/z$   $[\text{M} + \text{H}]^+$  calcd for  $\text{C}_{13}\text{H}_{13}\text{NO}_3$ : 256.0944; found: 256.0940.

**(E)-4-(3-nitrophenyl)-2-oxobut-3-en-1-yl formate (2u)**

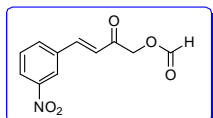

IR (KBr): 3436, 3071, 2929, 1727, 0718, 1680, 1629, 1526, 1430, 1354, 1206, 1171, 1099  $\text{cm}^{-1}$ ;  $^1\text{H NMR}$  (600 MHz,  $\text{CDCl}_3$ ):  $\delta$  = 8.40 (s, 1H), 8.23 (d,  $J$  = 7.8 Hz, 1H), 8.21 (s, 1H), 7.85 (d,  $J$  = 7.8 Hz, 1H), 7.70 (d,  $J$  = 16.2 Hz, 1H), 7.60-7.69 (t,  $J$  = 7.8 Hz, 1H), 6.93 (d,  $J$  = 16.8 Hz, 1H), 5.04 (s, 2H);  $^{13}\text{C NMR}$  (150 MHz,  $\text{CDCl}_3$ ):  $\delta$  = 191.0, 159.9, 159.8, 148.6, 141.4, 135.6, 134.2, 130.1, 125.1, 123.4, 122.6, 122.5, 66.8; HRMS (ESI):  $m/z$   $[\text{M} + \text{H}]^+$  calcd for  $\text{C}_{11}\text{H}_{10}\text{NO}_5$ : 236.05444; found: 236.05535.

**(E)-4-(4-nitrophenyl)-2-oxobut-3-en-1-yl formate (2v)**

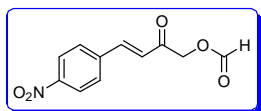

IR (KBr): 3421, 3112, 3065, 2931, 1718, 1681, 1593, 1513, 1343, 1178, 1106  $\text{cm}^{-1}$ ;  $^1\text{H}$  NMR (600 MHz,  $\text{CDCl}_3$ ):  $\delta$  = 8.28 (d,  $J$  = 8.4 Hz, 2H), 8.24 (s, 1H), 7.74 (d,  $J$  = 8.4 Hz, 3H), 6.94 (d,  $J$  = 15.6 Hz, 1H), 5.06 (s, 2H);  $^{13}\text{C}$  NMR (150 MHz,  $\text{CDCl}_3$ ):  $\delta$  = 191.0, 159.8, 148.8, 141.4, 140.0, 129.1, 124.4, 124.3, 66.8; HRMS (ESI):  $m/z$   $[\text{M} + \text{H}]^+$  calcd for  $\text{C}_{11}\text{H}_9\text{NO}_5$ : 236.0553; found: 236.0558.

**(E)-4-(4-hydroxyphenyl)-2-oxobut-3-en-1-yl formate (2w)**

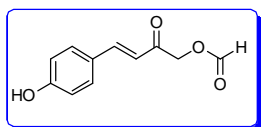

IR (KBr): 3380, 2925, 2855, 1729, 1682, 1584, 1515, 1453, 1379, 1286, 1171, 1024  $\text{cm}^{-1}$ ;  $^1\text{H}$  NMR (600 MHz, DMSO):  $\delta$  = 10.21 (s, 1H), 8.39 (s, 1H), 7.65 (d,  $J$  = 16.8 Hz, 1H), 7.61 (d,  $J$  = 8.4 Hz, 2H), 6.86 (d,  $J$  = 7.8 Hz, 2H), 6.79 (d,  $J$  = 16.8 Hz, 1H), 5.15 (s, 2H);  $^{13}\text{C}$  NMR (150 MHz,  $\text{CDCl}_3$ ):  $\delta$  = 192.0, 160.3, 143.9, 130.9, 125.2, 119.0, 116.0, 66.8; HRMS (ESI):  $m/z$   $[\text{M} + \text{H}]^+$  calcd for  $\text{C}_{11}\text{H}_{10}\text{O}_4$ : 229.0471; found: 229.0782.

**(E)-4-(4-bromophenyl)-2-oxobut-3-en-1-yl formate (2x)**

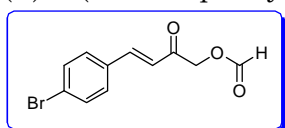

IR (KBr): 3433, 2998, 2934, 1725, 1666, 1620, 1584, 1486, 1428, 1391, 1285, 1261, 1190, 1164, 1072, 1008  $\text{cm}^{-1}$ ;  $^1\text{H}$  NMR (600 MHz, DMSO):  $\delta$  = 8.22 (s, 1H), 7.62 (d,  $J$  = 16.2 Hz, 1H), 7.54 (d,  $J$  = 8.4 Hz, 2H), 7.43 (d,  $J$  = 8.4 Hz, 2H), 6.80 (d,  $J$  = 16.2 Hz, 1H), 5.02 (s, 2H);  $^{13}\text{C}$  NMR (150 MHz,  $\text{CDCl}_3$ ):  $\delta$  = 191.2, 159.9, 143.1, 132.7, 132.3, 129.8, 125.5, 121.5, 66.6; HRMS (ESI):  $m/z$   $[\text{M} + \text{H}]^+$  calcd for  $\text{C}_{11}\text{H}_9\text{BrO}_3$ : 290.9627; found: 290.9631.

**2-oxo-2-phenylethyl acetate (3a)**

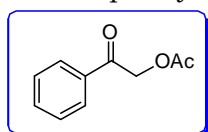

IR (KBr): 3472, 3064, 2937, 1750, 1703, 1597, 1448, 1422, 1375, 1221, 1085, 998  $\text{cm}^{-1}$ ;  $^1\text{H}$  NMR (600 MHz,  $\text{CDCl}_3$ ):  $\delta$  = 7.92 (d,  $J$  = 8.4 Hz, 2H), 7.59-7.63 (t,  $J$  = 7.2 Hz, 1H), 7.47-4.51 (t,  $J$  = 7.2 Hz), 5.35 (s, 2H), 2.23 (s, 3H);  $^{13}\text{C}$  NMR (150 MHz,  $\text{CDCl}_3$ ):  $\delta$  = 192.1, 170.4, 134.0, 133.8, 128.8, 127.7, 66.0, 20.5; HRMS (ESI):  $m/z$   $[\text{M} + \text{H}]^+$  calcd for  $\text{C}_{10}\text{H}_{11}\text{O}_3$ : 179.07027; found: 179.06977.

**2-oxo-2-(p-tolyl)ethyl acetate (3b)**

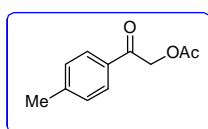

IR (KBr): 3465, 2954, 1749, 1699, 1605, 1420, 1372, 1289, 1226, 1180, 1085, 1051  $\text{cm}^{-1}$ ;  $^1\text{H}$  NMR (400 MHz,  $\text{CDCl}_3$ ):  $\delta$  = 7.74 (d,  $J$  = 8.0 Hz, 2H), 7.21 (d,  $J$  = 8.0 Hz, 2H), 5.25 (s, 2H), 5.35 (s, 3H), 2.16 (s, 3H);  $^{13}\text{C}$  NMR (100 MHz,  $\text{CDCl}_3$ ):  $\delta$  = 191.7, 144.8, 131.6, 129.5, 129.4, 128.7, 127.8, 65.9, 21.7, 20.6; HRMS (ESI):  $m/z$   $[\text{M} + \text{H}]^+$  calcd for  $\text{C}_{11}\text{H}_{12}\text{O}_3$ : 215.0679; found: 215.0680.

**2-(4-methoxyphenyl)-2-oxoethyl acetate (3c)**

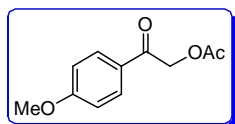

IR (KBr): 3465, 3040, 2954, 1926, 1749, 1696, 1605, 1571, 1420, 1372, 1289, 1226, 1180, 1085, 1051  $\text{cm}^{-1}$ ;  $^1\text{H}$  NMR (400 MHz,  $\text{CDCl}_3$ ):  $\delta$  = 7.89-7.92 (m, 2H), 7.95-7.98 (m, 2H), 5.31 (s, 2H), 3.89 (s, 3H), 2.24 (s, 3H);  $^{13}\text{C}$  NMR (150 MHz,  $\text{CDCl}_3$ ):  $\delta$  = 190.6, 170.5, 164.0, 130.0, 127.1, 65.7, 55.5, 20.6; HRMS (ESI):  $m/z$   $[\text{M} + \text{H}]^+$  calcd for  $\text{C}_{11}\text{H}_{13}\text{O}_4$ : 209.07980; found: 209.08084.

**2-(4-nitrophenyl)-2-oxoethyl acetate (3d)**

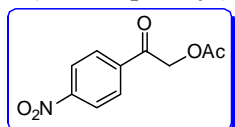

IR (KBr): 3478, 3119, 2926, 2855, 1748, 1703, 1603, 1524, 1416, 1373, 1348, 1319, 1284, 1248, 1218, 1107, 1081  $\text{cm}^{-1}$ ;  $^1\text{H}$  NMR (400 MHz,  $\text{CDCl}_3$ ):  $\delta$  = 8.35 (d,  $J$  = 8.0 Hz, 2H), 8.09 (d,  $J$  = 8.0 Hz, 2H), 5.34 (s, 2H), 2.24 (s, 3H);  $^{13}\text{C}$  NMR (100 MHz,  $\text{CDCl}_3$ ):  $\delta$  = 191.0, 170.3, 150.7, 138.6, 128.9, 124.1, 66.0, 29.7, 20.5; HRMS (ESI):  $m/z$   $[\text{M} + \text{H}]^+$  calcd for  $\text{C}_{10}\text{H}_{10}\text{NO}_5$ : 224.05463; found: 224.05535.

**2-(4-bromophenyl)-2-oxoethyl acetate (3e)**

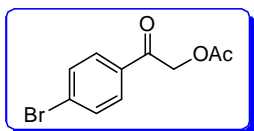

IR (KBr): 3487, 3376, 2990, 2950, 1746, 1694, 1585, 1430, 1398, 1378, 1292, 1225, 1069  $\text{cm}^{-1}$ ;  $^1\text{H}$  NMR (400 MHz,  $\text{CDCl}_3$ ):  $\delta$  = 7.77-7.80 (m, 2H), 7.63-7.65 (m, 2H), 5.30 (s, 2H), 2.23 (s, 3H);  $^{13}\text{C}$  NMR (100 MHz,  $\text{CDCl}_3$ ):  $\delta$  = 191.3, 170.3, 132.8, 132.2, 129.2, 129.1, 65.8, 20.5; HRMS (ESI):  $m/z$  [ $\text{M} + \text{H}$ ] $^+$  calcd for  $\text{C}_{10}\text{H}_9\text{BrO}_3$ : 278.9627; found: 278.9631.

#### 2-(furan-2-yl)-2-oxoethyl acetate (3f)

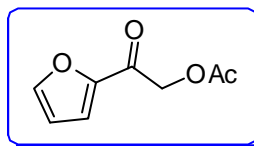

IR (KBr): 3484, 3135, 2942, 1751, 1693, 1572, 1469, 1421, 1400, 1374, 1229, 1162, 1080, 1029  $\text{cm}^{-1}$ ;  $^1\text{H}$  NMR (400 MHz,  $\text{CDCl}_3$ ):  $\delta$  = 7.62 (d,  $J$  = 2.4 Hz, 1H), 7.29 (d,  $J$  = 4.0 Hz, 1H), 6.58-6.59 (q,  $J$  = 2 Hz, 1H), 5.19 (s, 2H), 2.22 (s, 3H);  $^{13}\text{C}$  NMR (100 MHz,  $\text{CDCl}_3$ ):  $\delta$  = 181.7, 170.3, 150.5, 146.7, 117.7, 112.5, 65.3, 20.5; HRMS (ESI):  $m/z$  [ $\text{M} + \text{H}$ ] $^+$  calcd for  $\text{C}_8\text{H}_8\text{O}_4$ : 191.0315; found: 191.0312.

#### 2-oxo-2-(thiophen-2-yl)ethyl acetate (3g)

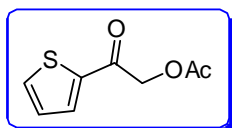

IR (KBr): 3484, 3135, 2942, 1751, 1693, 1572, 1469, 1421, 1400, 1374, 1229, 1162, 1080, 1029  $\text{cm}^{-1}$ ;  $^1\text{H}$  NMR (400 MHz,  $\text{CDCl}_3$ ):  $\delta$  = 7.76 (d,  $J$  = 2.4 Hz, 1H), 7.71 (d,  $J$  = 4.8 Hz, 1H), 7.16-7.18 (t,  $J$  = 4.4 Hz, 1H), 5.23 (s, 2H), 2.23 (s, 3H);  $^{13}\text{C}$  NMR (100 MHz,  $\text{CDCl}_3$ ):  $\delta$  = 185.4, 170.3, 134.3, 131.9, 128.2, 65.7, 20.5; HRMS (ESI):  $m/z$  [ $\text{M} + \text{H}$ ] $^+$  calcd for  $\text{C}_8\text{H}_8\text{O}_3\text{S}$ : 207.0086; found: 207.0082.

#### 2-(naphthalen-2-yl)-2-oxoethyl acetate (3h)

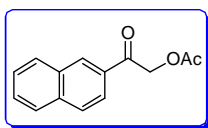

IR (KBr): 3466, 3062, 2943, 1750, 1696, 1624, 1592, 1467, 1417, 1375, 1235, 1176, 1081, 1026, 1008  $\text{cm}^{-1}$ ;  $^1\text{H}$  NMR (400 MHz,  $\text{CDCl}_3$ ):  $\delta$  = 8.41 (s, 1H), 7.951-7.976 (q,  $J$  = 8.4 Hz, 2H), 7.891-7.938 (t,  $J$  = 8.4 Hz, 1H), 7.56-7.62 (m, 2H), 5.47 (s, 2H), 2.25 (s, 3H);  $^{13}\text{C}$  NMR (100 MHz,  $\text{CDCl}_3$ ):  $\delta$  = 192.1, 170.5, 135.9, 132.3, 131.5, 129.5, 128.8, 127.8, 127.0, 123.2, 66.1, 20.6; HRMS (ESI):  $m/z$  [ $\text{M} + \text{H}$ ] $^+$  calcd for  $\text{C}_{14}\text{H}_{12}\text{O}_3$ : 251.0679; found: 251.0885.

#### (E)-2-oxo-4-phenylbut-3-en-1-yl acetate (3o)

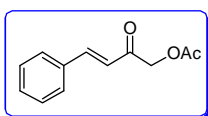

IR (KBr): 3457, 2932, 1751, 1705, 1688, 1615, 1450, 1419, 1377, 1232, 1195, 1051  $\text{cm}^{-1}$ ;  $^1\text{H}$  NMR (400 MHz,  $\text{CDCl}_3$ ):  $\delta$  = 7.67 (d,  $J$  = 16.4 Hz, 1H), 7.55-7.58 (q,  $J$  = 6.8 Hz, 2H), 6.79 (s,  $J$  = 16.0 Hz, 1H), 4.95 (s, 3H), 2.22 (s, 3H);  $^{13}\text{C}$  NMR (100 MHz,  $\text{CDCl}_3$ ):  $\delta$  = 192.41, 170.3, 144.2, 134.0, 131.0, 129.0, 128.5, 121.5, 67.4, 20.6; HRMS (ESI):  $m/z$  [ $\text{M} + \text{H}$ ] $^+$  calcd for  $\text{C}_{12}\text{H}_{12}\text{O}_3$ : 227.0679; found: 227.5765.

#### (E)-4-(4-(benzyloxy)-3-methoxyphenyl)-2-oxobut-3-en-1-yl acetate (3r)

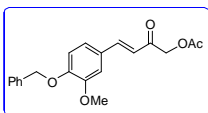

IR (KBr): 3452, 3016, 2923, 1724, 1680, 1620, 1513, 1454, 1424, 1384, 1367, 1326, 1271, 1226, 1200, 1168, 1137, 1066, 1025  $\text{cm}^{-1}$ ;  $^1\text{H}$  NMR (400 MHz,  $\text{CDCl}_3$ ):  $\delta$  = 7.60 (d,  $J$  = 16.0 Hz, 1H), 7.43 (d,  $J$  = 7.2 Hz, 2H), 7.36-7.40 (m, 2H), 7.33 (d,  $J$  = 7.2 Hz, 1H), 7.071-7.091 (q,  $J$  = 6.0 Hz, 1H), 6.89 (d,  $J$  = 9.2 Hz, 1H), 6.64 (d,  $J$  = 16.0 Hz, 1H), 5.21 (s, 2H), 4.94 (s, 2H), 3.93 (s, 3H), 2.22 (s, 3H);  $^{13}\text{C}$  NMR (100 MHz,  $\text{CDCl}_3$ ):  $\delta$  = 192.1, 170.4, 150.9, 149.7, 144.1, 136.3, 128.7, 128.1, 127.2, 123.2, 119.5, 113.3, 110.3, 70.8, 67.2, 56.0, 20.6; HRMS (ESI):  $m/z$  [ $\text{M} + \text{H}$ ] $^+$  calcd for  $\text{C}_{20}\text{H}_{20}\text{O}_5$ : 341.1384; found: 341.1387.

#### (E)-4-(3,4-dimethoxyphenyl)-2-oxobut-3-en-1-yl acetate (3s)

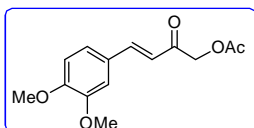

IR (KBr): 3444, 2998, 2916, 1837, 1736, 1696, 1593, 1512, 1466, 1424, 1378, 1263, 1162, 1143, 1112, 1052, 1021  $\text{cm}^{-1}$ ;  $^1\text{H}$  NMR (400 MHz,  $\text{CDCl}_3$ ):  $\delta$  = 7.62 (d,  $J$  = 16.4 Hz, 1H), 7.16 (d,  $J$  = 8.4 Hz, 2H), 6.88 (d,  $J$  = 8.4 Hz, 1H), 6.66 (d,  $J$  = 15.6 Hz, 1H), 4.96 (s, 2H), 3.93 (s, 6H), 2.22 (s, 3H);  $^{13}\text{C}$  NMR (100 MHz,  $\text{CDCl}_3$ ):  $\delta$  = 192.1, 170.4, 150.9, 149.7, 144.1, 136.3, 128.7, 128.1, 127.2, 123.2, 119.5,

113.3, 110.3, 70.8, 67.2, 56.0, 20.6; HRMS (ESI):  $m/z$   $[M + H]^+$  calcd for  $C_{14}H_{16}O_5$ : 287.0890; found: 287.0888.

**(E)-4-(3-nitrophenyl)-2-oxobut-3-en-1-yl acetate (3v)**

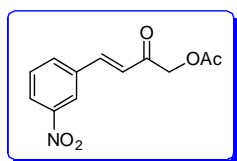

IR (KBr): 3460, 3067, 2927, 2855, 1740, 1667, 1630, 1528, 1439, 1384, 1351, 1250, 1199, 1068  $cm^{-1}$ ;  $^1H$  NMR (400 MHz,  $CDCl_3$ ):  $\delta$  = 8.42 (s, 1H), 8.26 (d,  $J$  = 7.2 Hz, 1H), 7.86 (d,  $J$  = 7.8 Hz, 1H), 7.71 (d,  $J$  = 16.04 Hz, 1H), 7.612-7.685 (t,  $J$  = 8.4 Hz, 1H), 6.91 (d,  $J$  = 16.4 Hz, 2H), 4.95 (s, 1H), 2.23 (s, 3H);  $^{13}C$  NMR (100 MHz,  $CDCl_3$ ):  $\delta$  = 192.0, 141.1, 134.2, 130.1, 125.1, 123.7, 122.6, 67.6, 20.5; HRMS (ESI):  $m/z$   $[M + H]^+$  calcd for  $C_{12}H_{12}NO_5$ : 250.07035; found: 250.07100.

**(E)-4-(4-nitrophenyl)-2-oxobut-3-en-1-yl acetate (3w)**

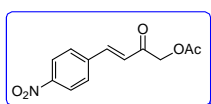

IR (KBr): 3443, 2927, 1740, 1702, 1621, 1594, 1513, 1415, 1349, 1265, 1235, 1115, 1058, 1002  $cm^{-1}$ ;  $^1H$  NMR (400 MHz,  $CDCl_3$ ):  $\delta$  = 8.27 (d,  $J$  = 7.6 Hz, 2H), 7.72 (d,  $J$  = 7.2 Hz, 2H), 7.68 (s, 1H), 6.90 (d,  $J$  = 16.4 Hz, 1H), 2.23 (s, 3H);  $^{13}C$  NMR (100 MHz,  $CDCl_3$ ):  $\delta$  = 191.9, 170.2, 148.8, 141.0, 140.1, 129.0, 124.8, 124.2, 67.6, 20.5; HRMS (ESI):  $m/z$   $[M + H]^+$  calcd for  $C_{12}H_{12}NO_5$ : 250.07035; found: 250.07100.

**7. Appendix: spectral Copies of  $^1H$  NMR and  $^{13}C$  NMR of compounds obtained in this Study**

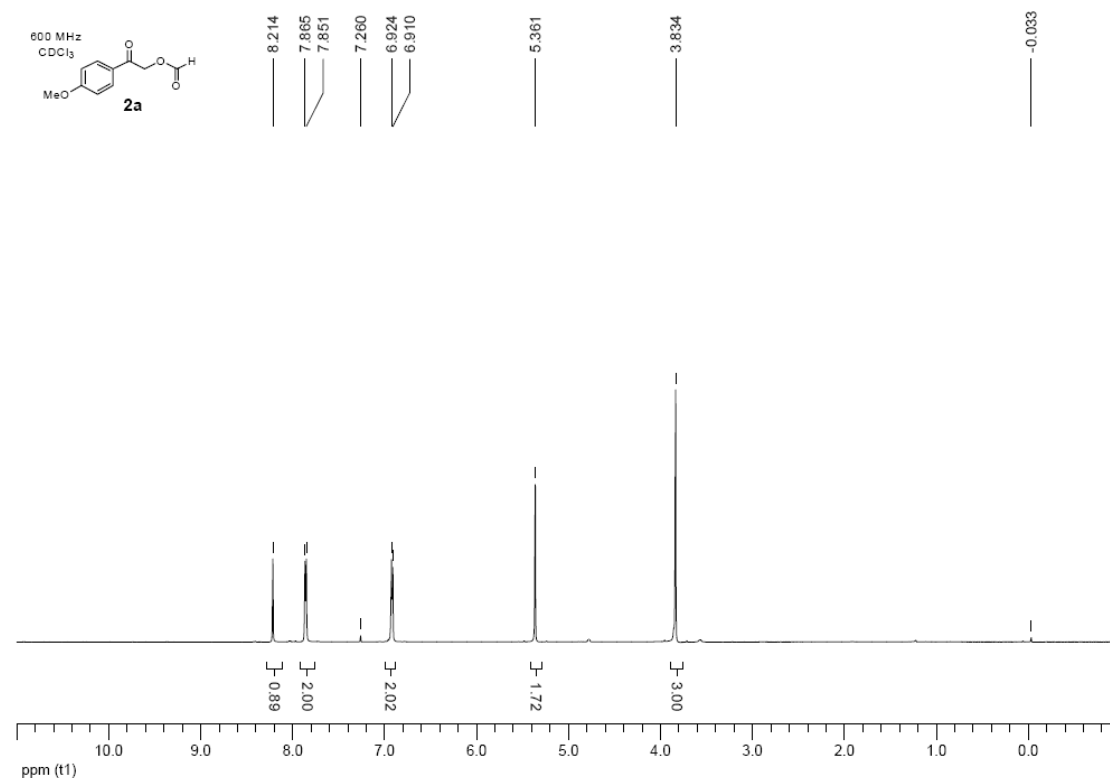

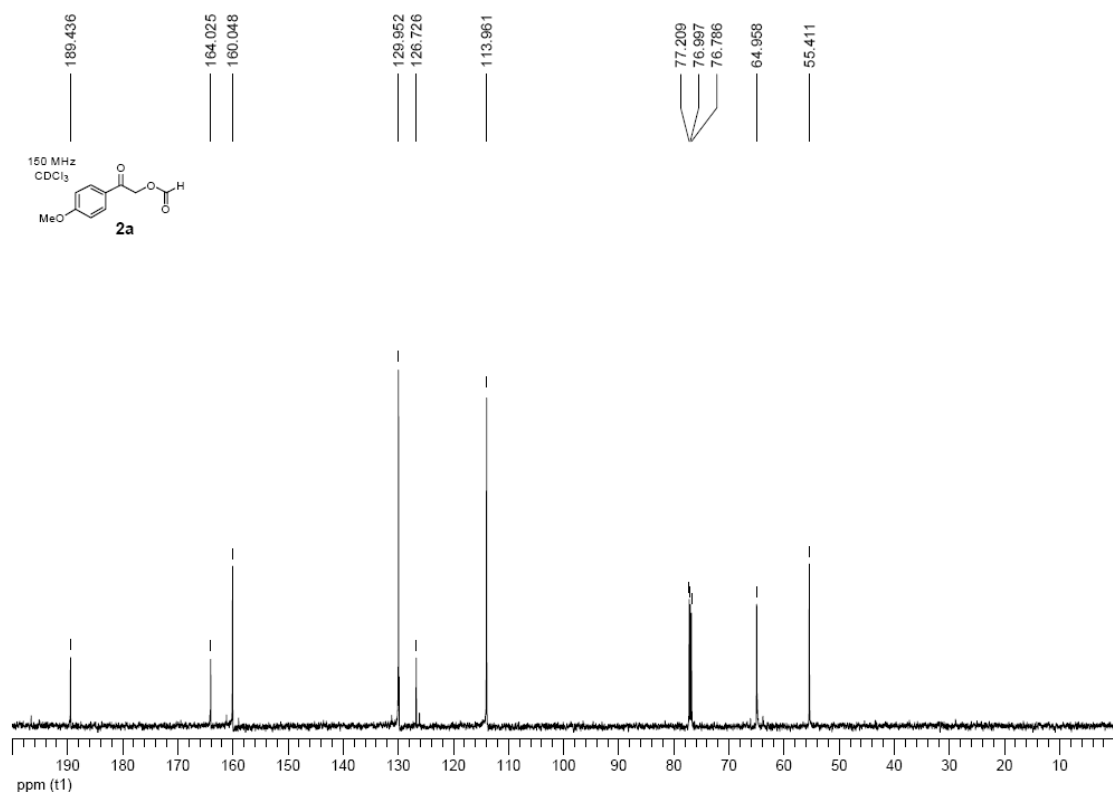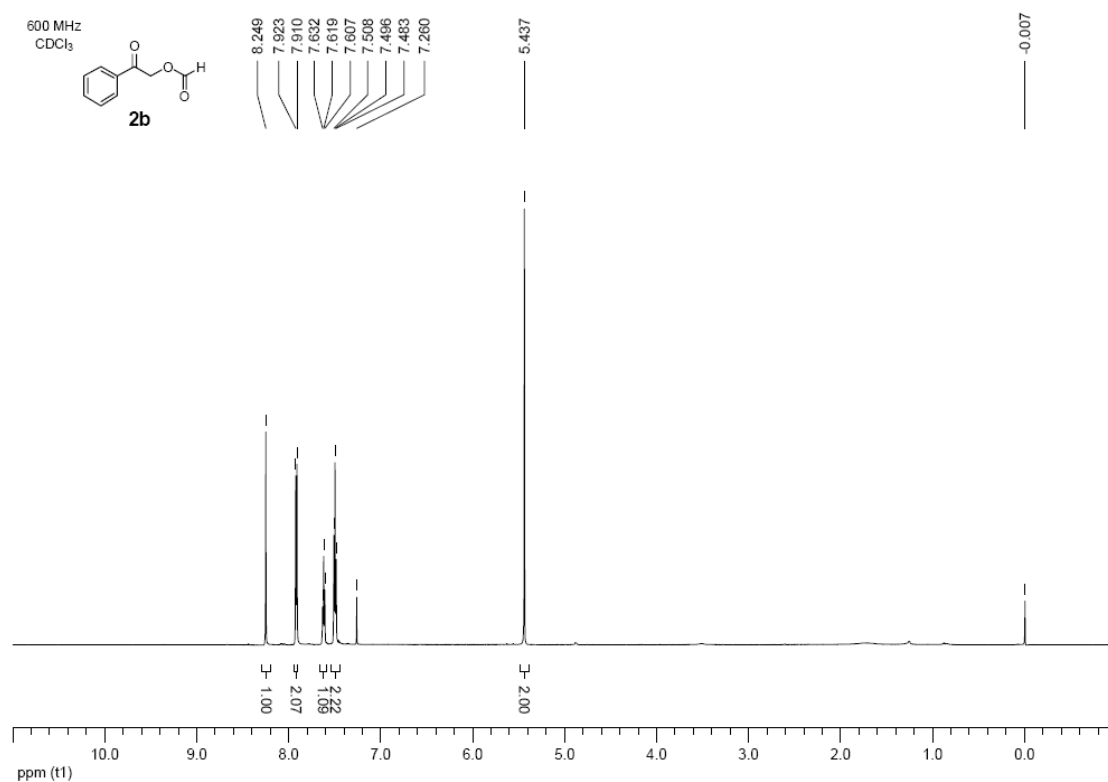

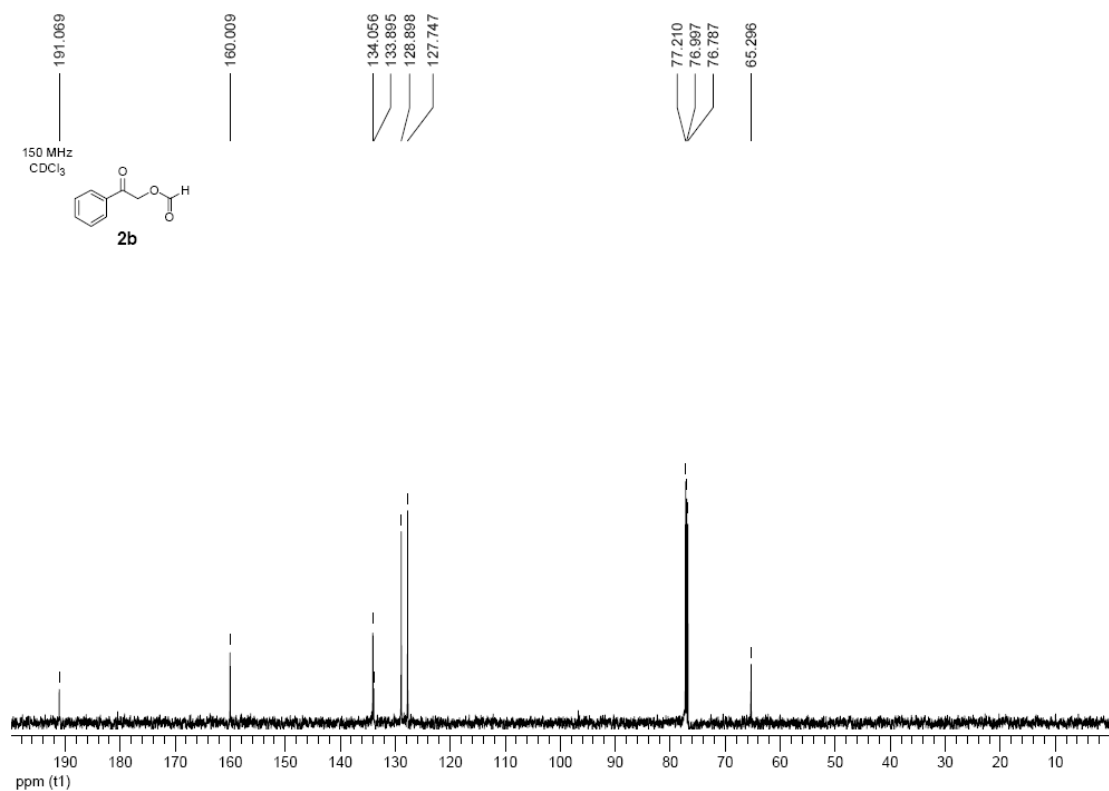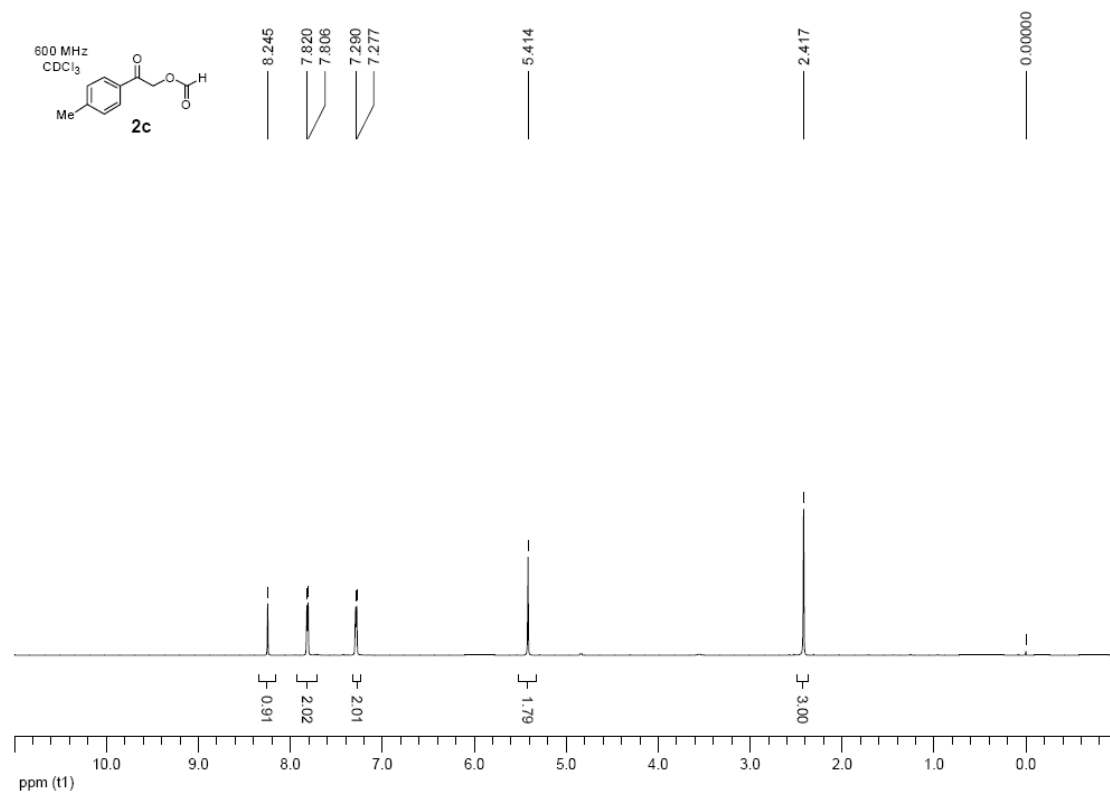

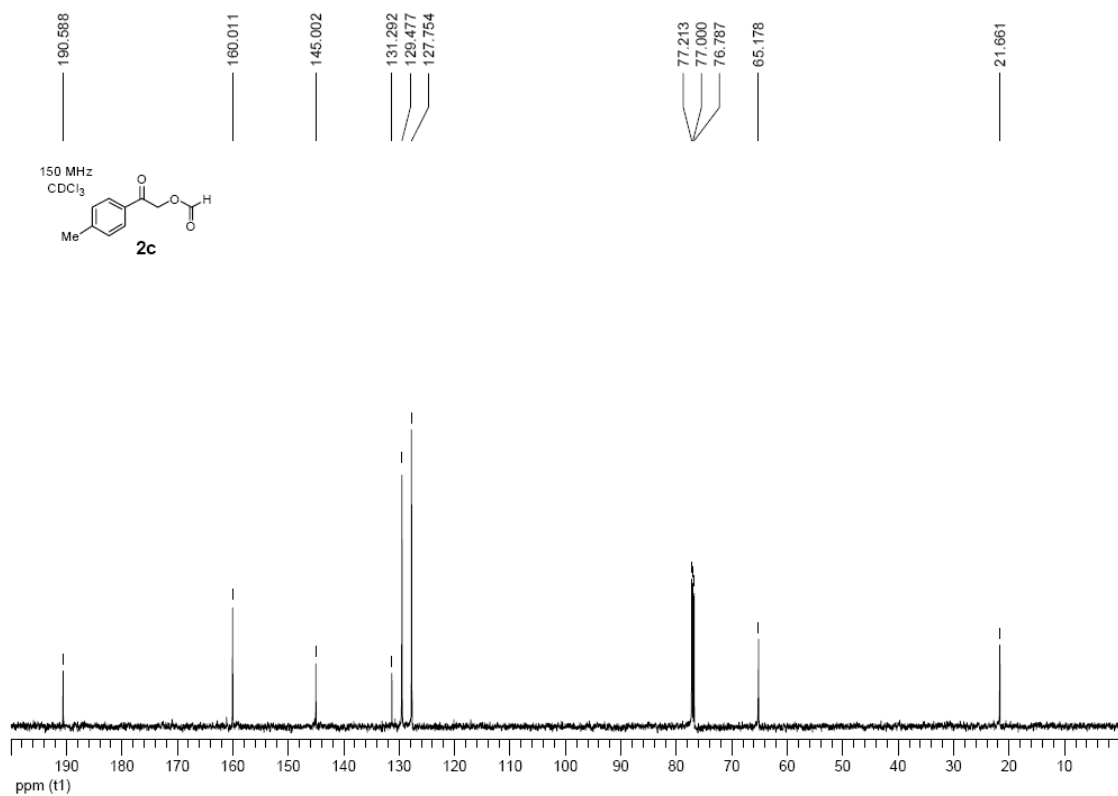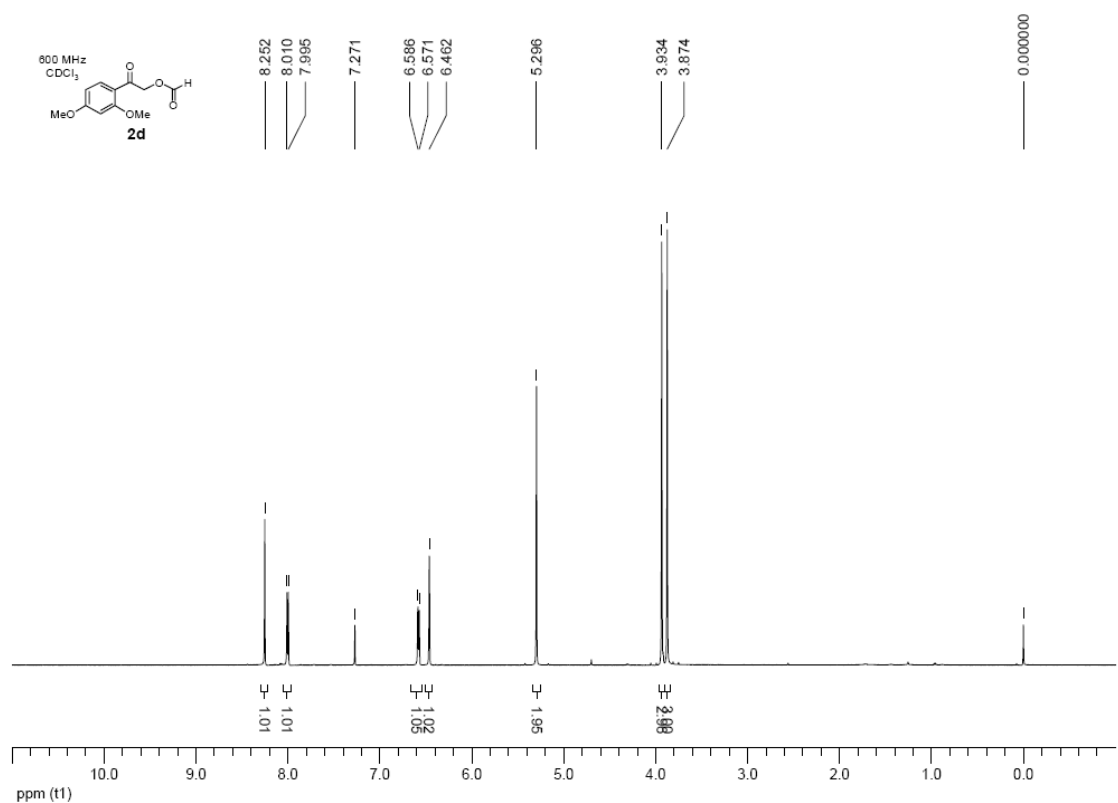

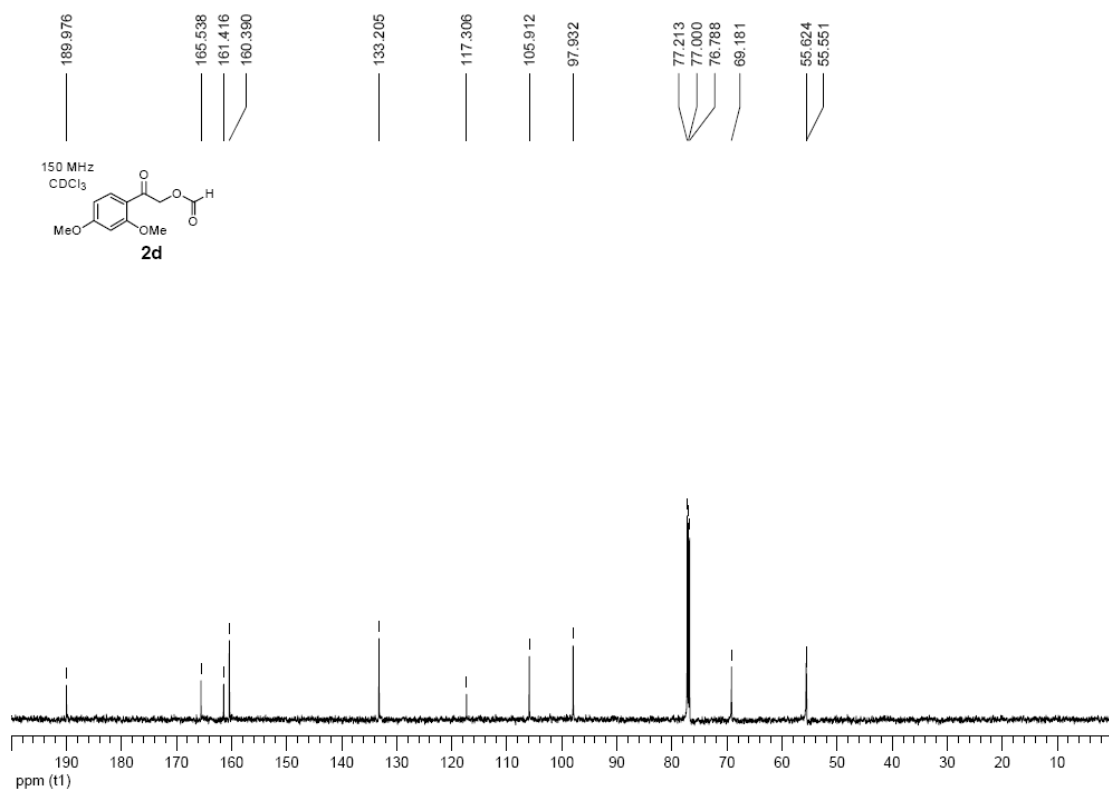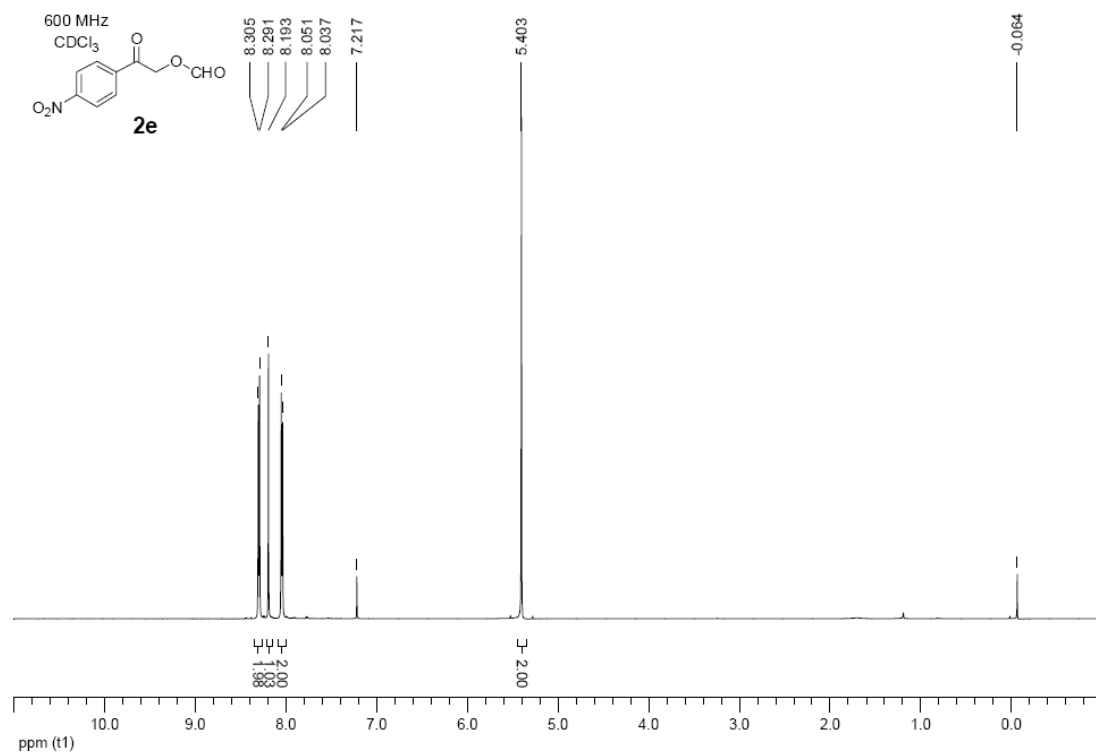



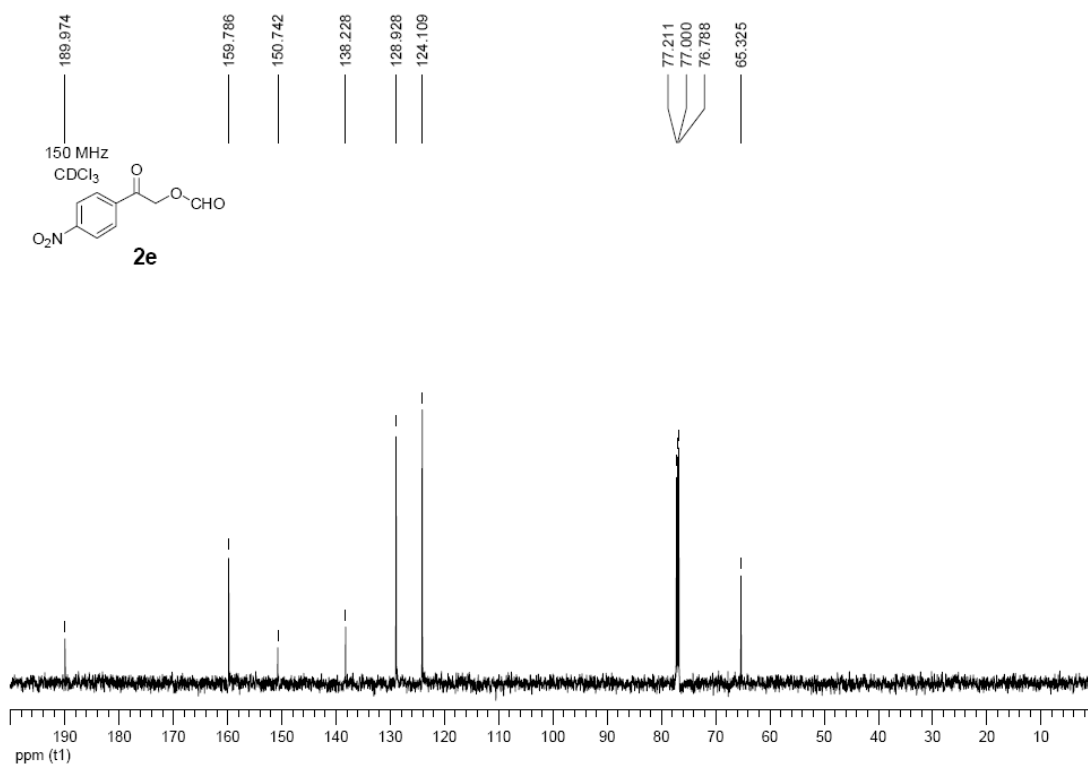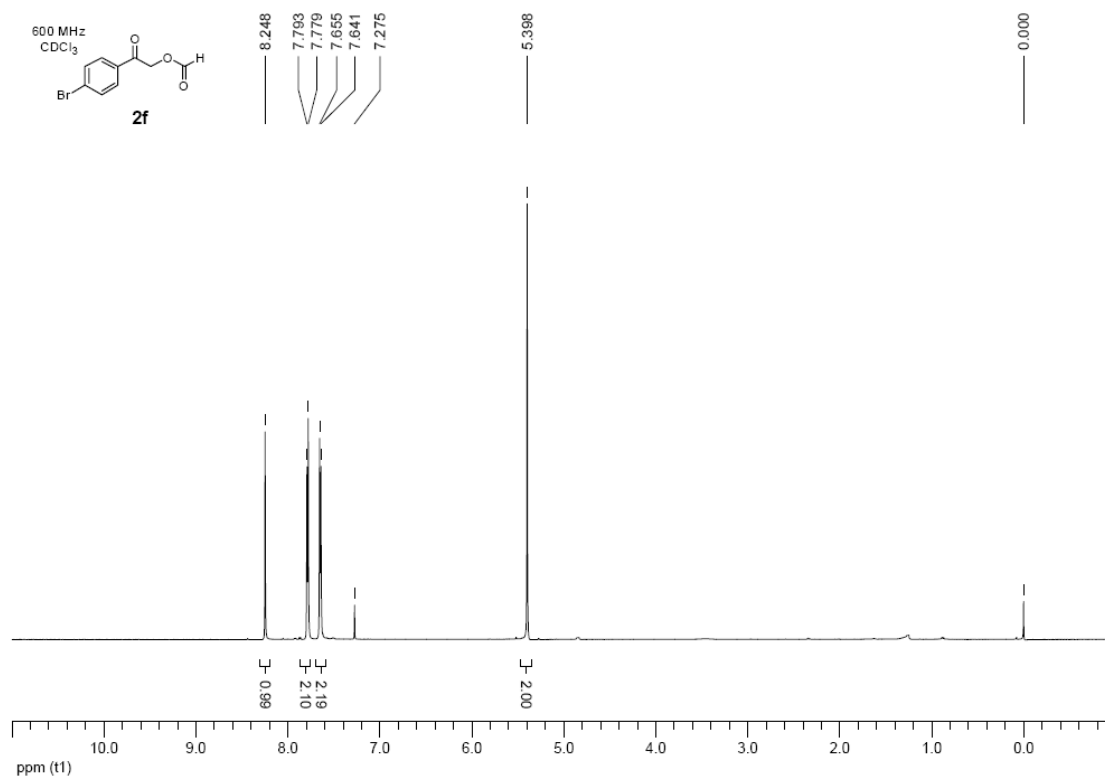

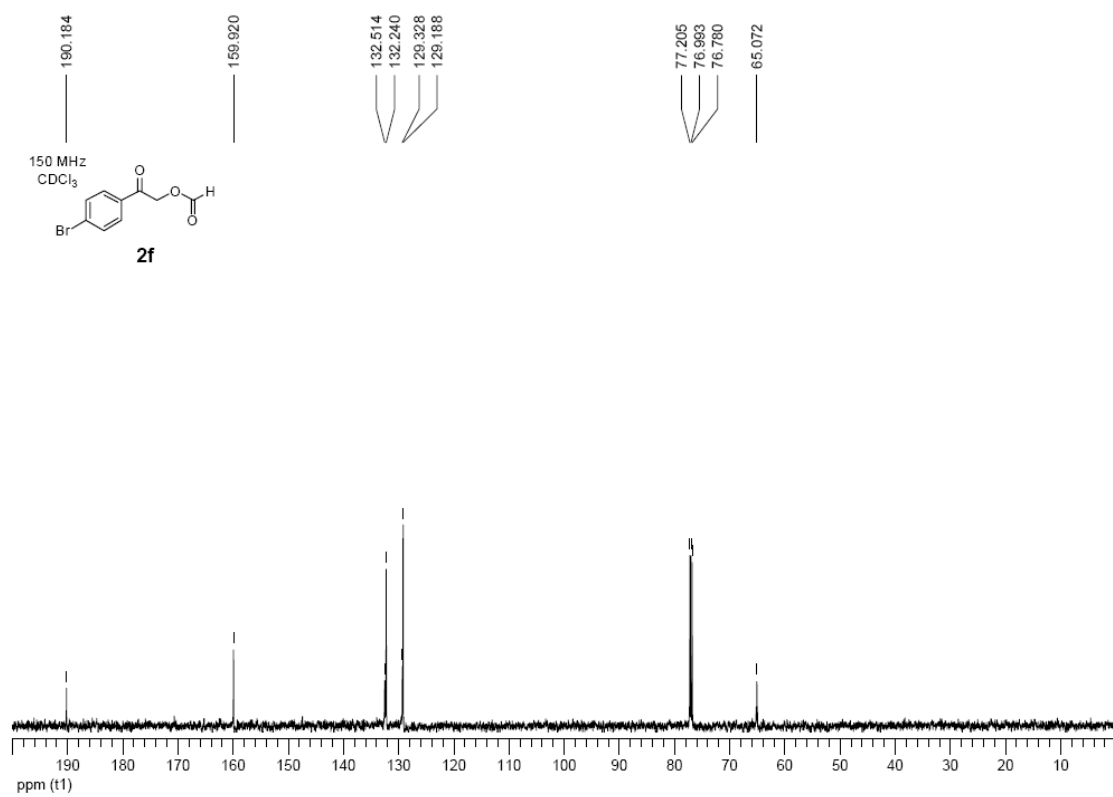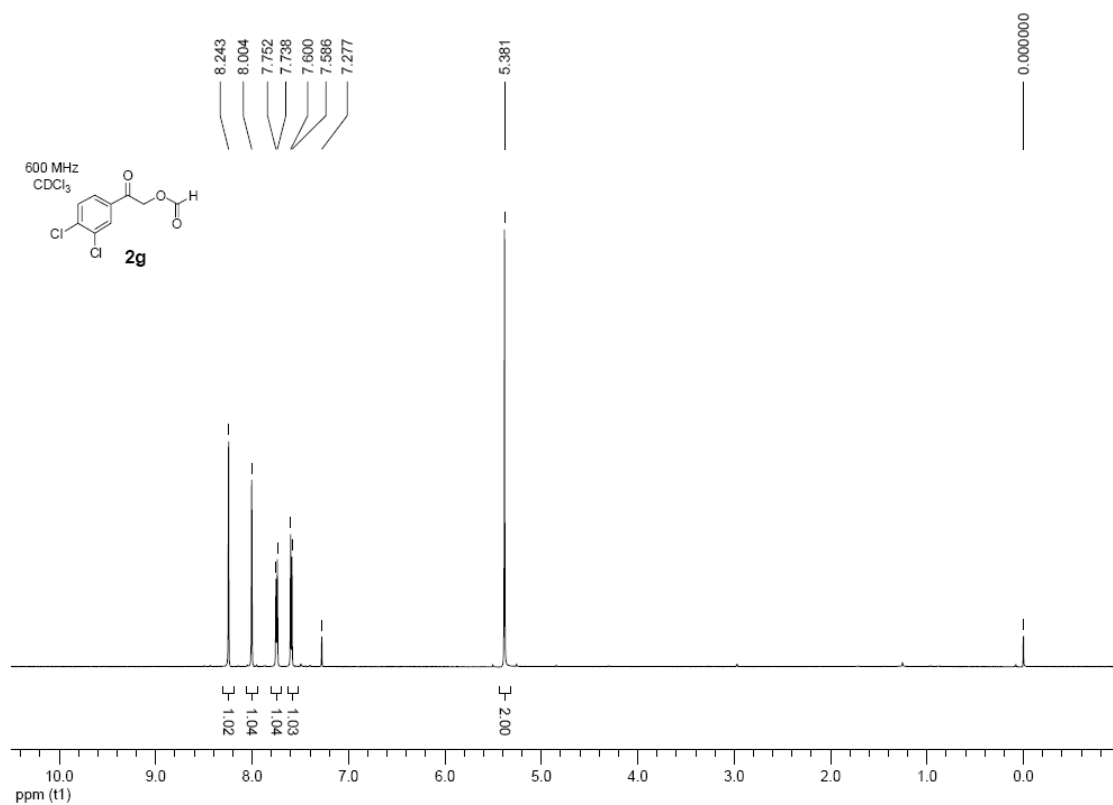

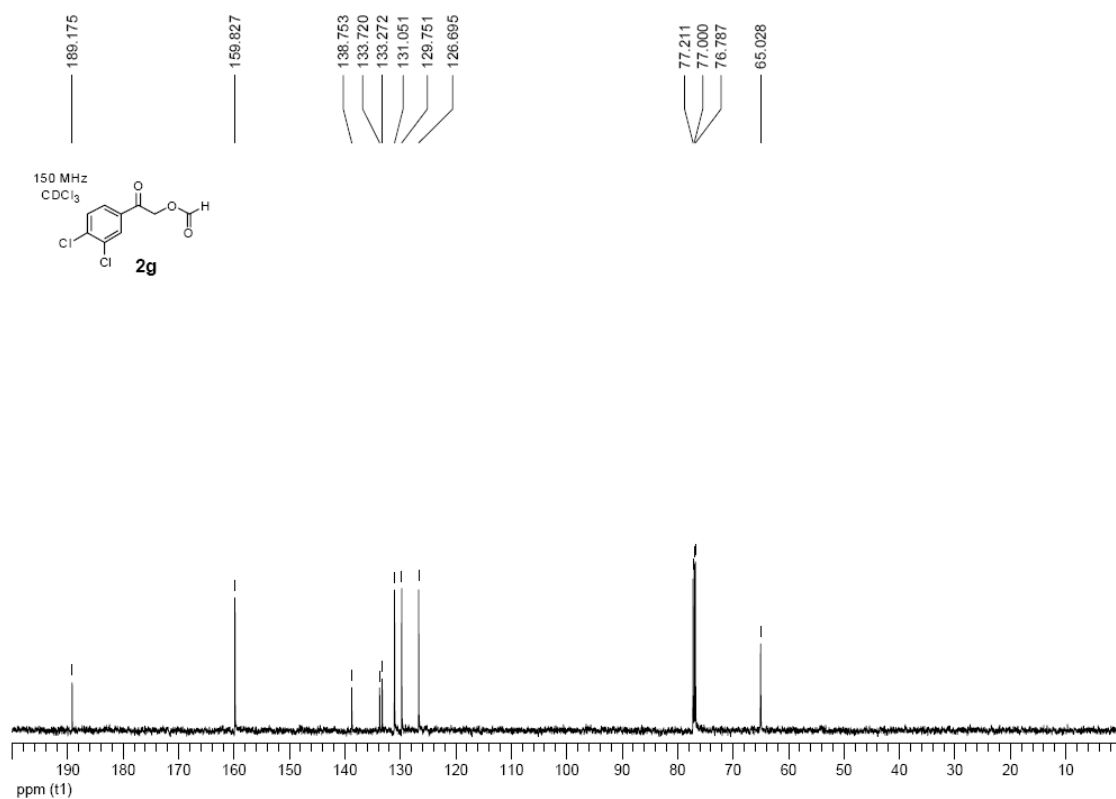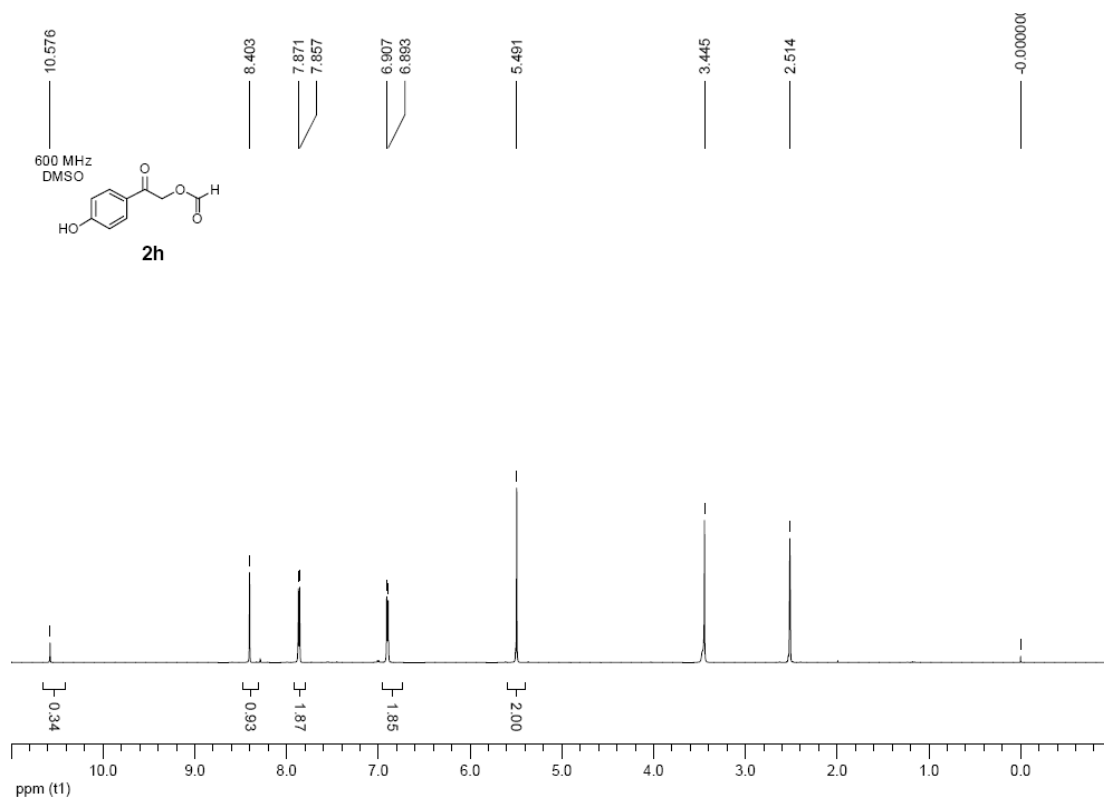

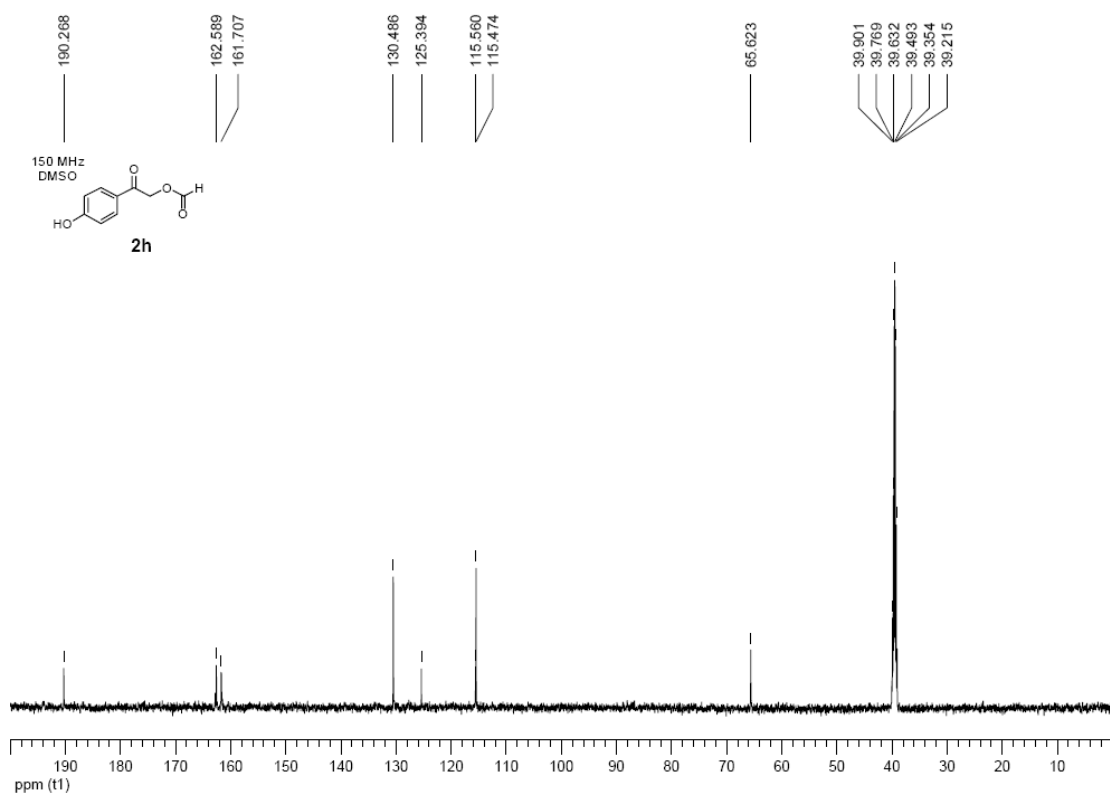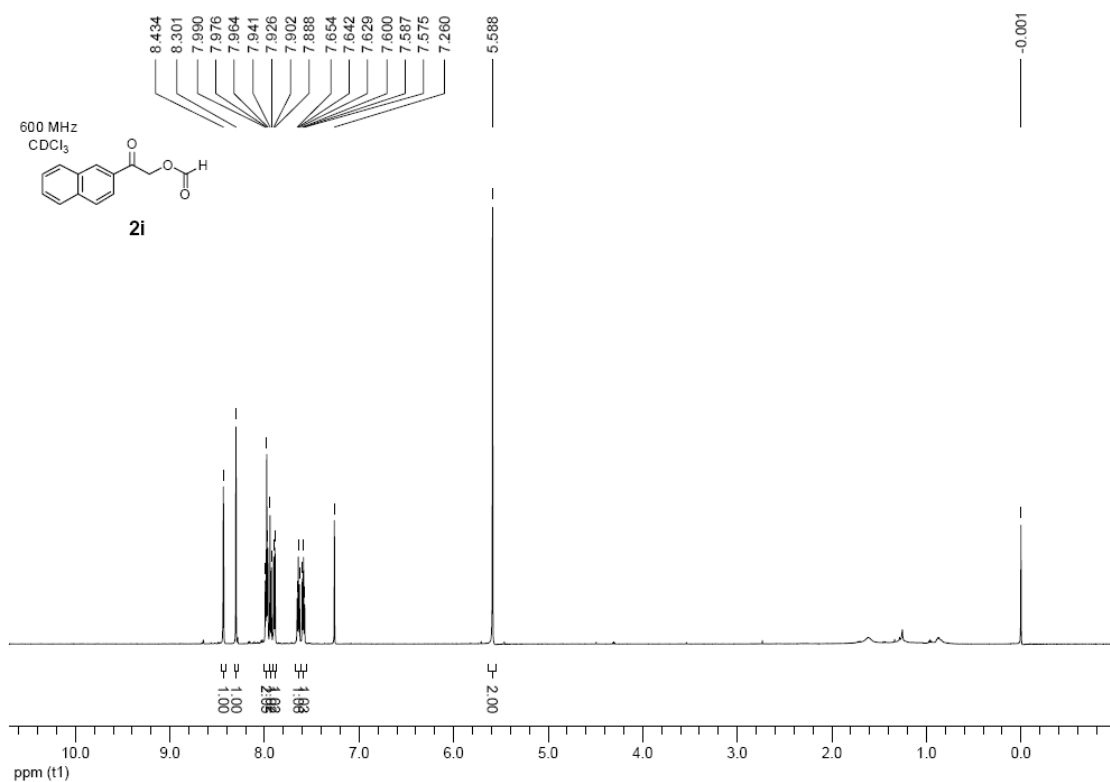

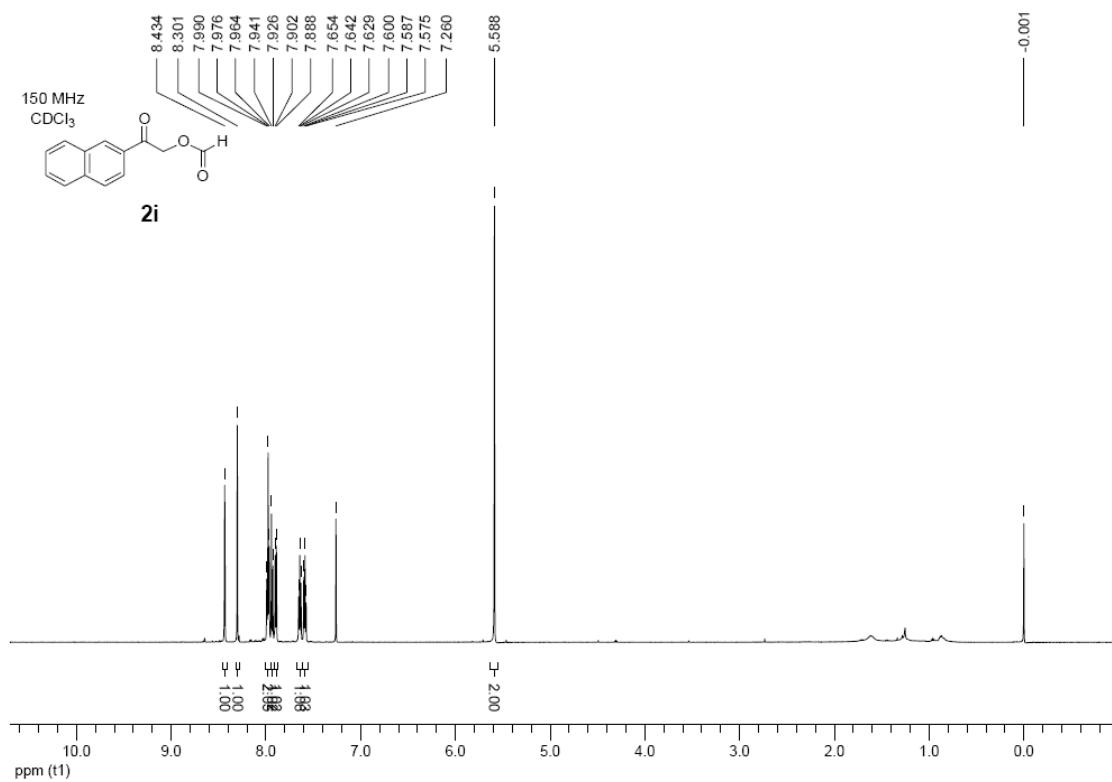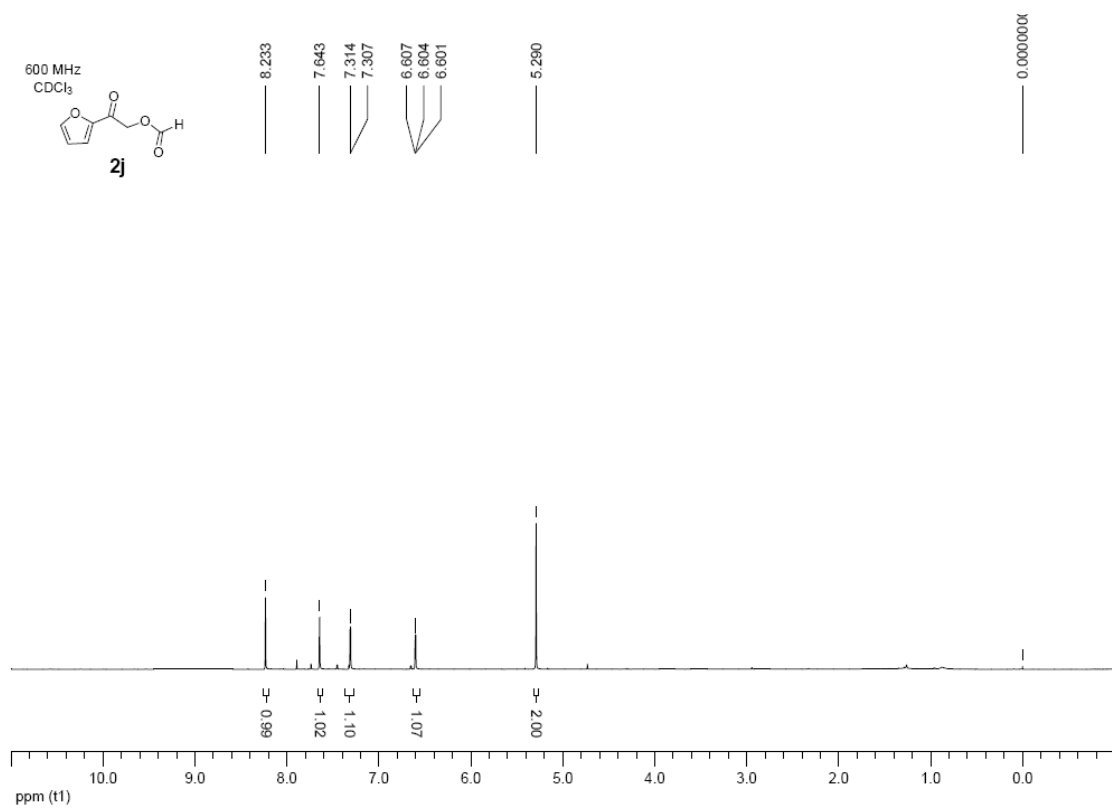

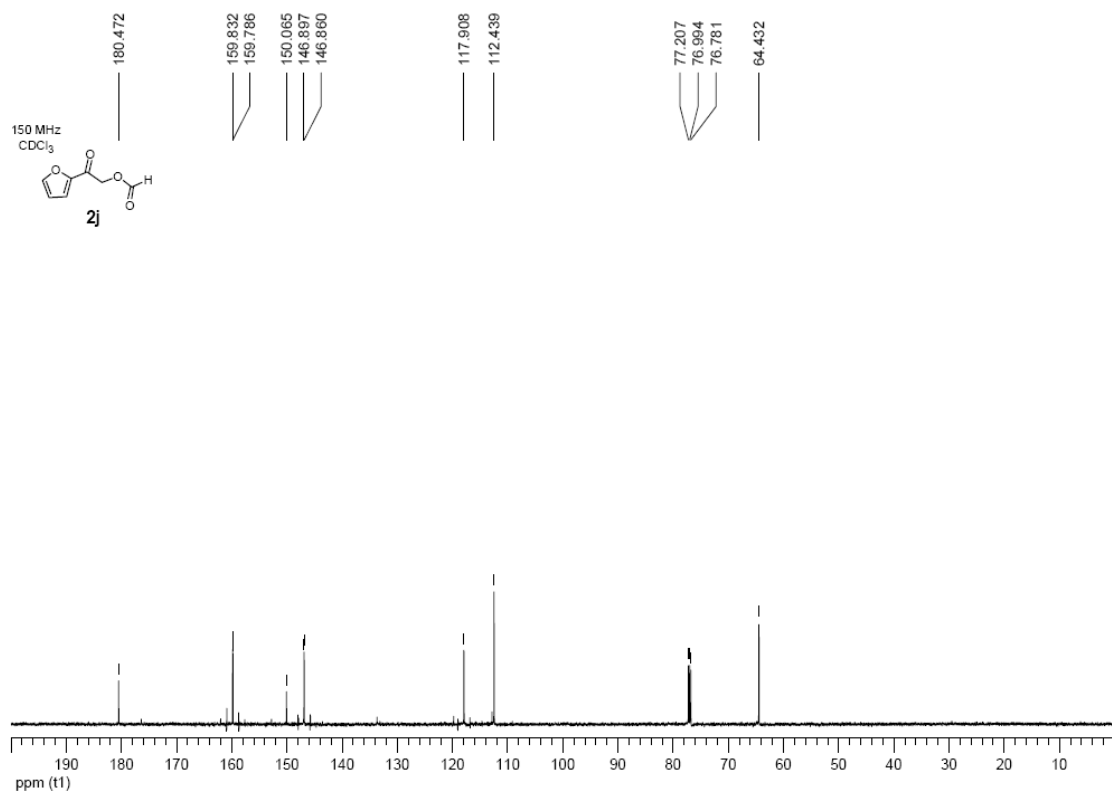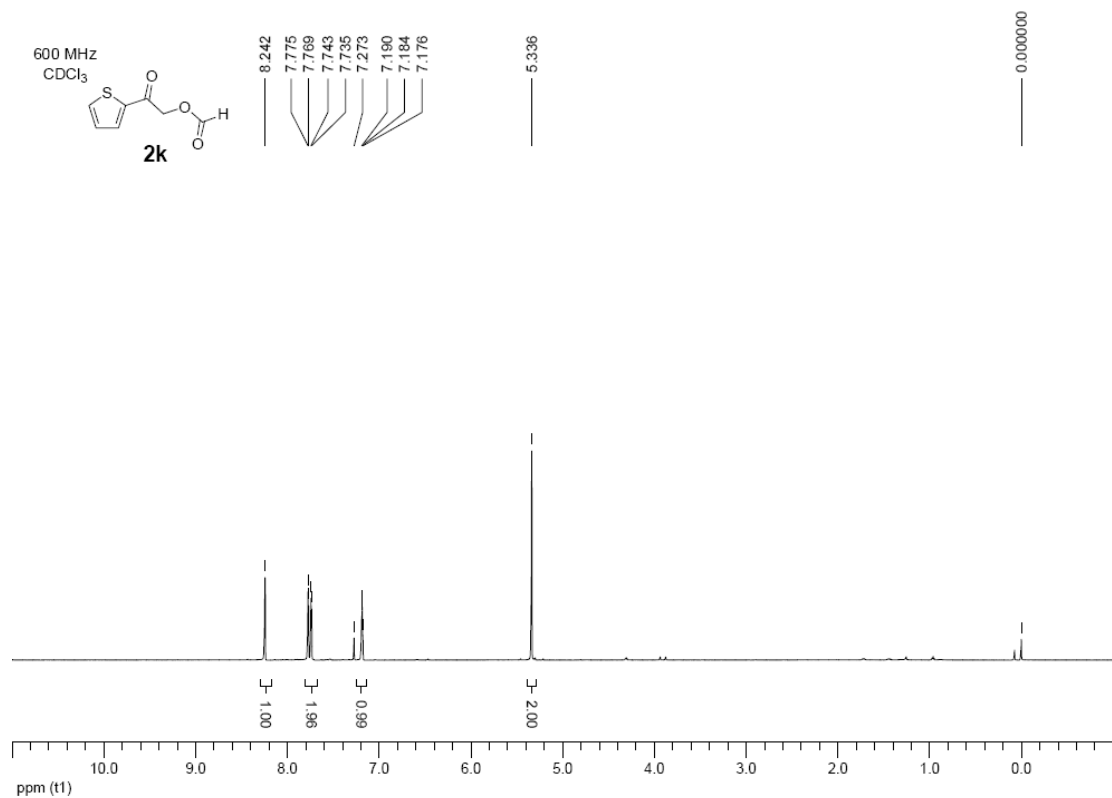

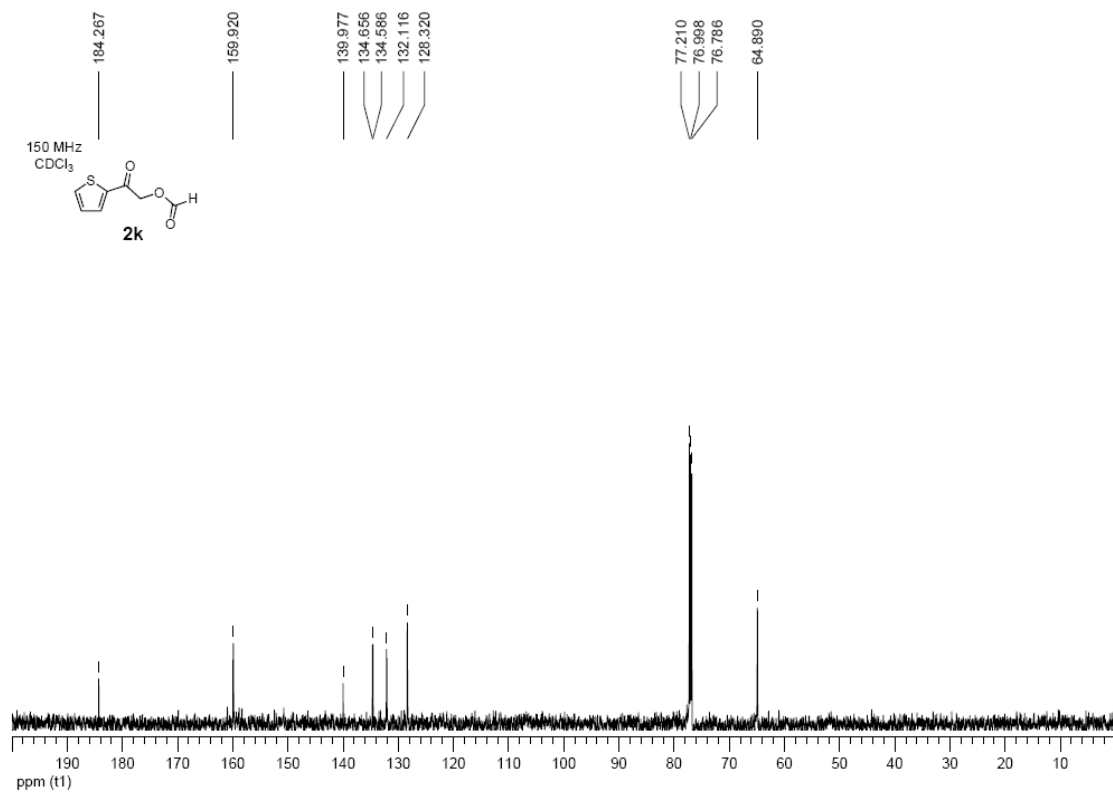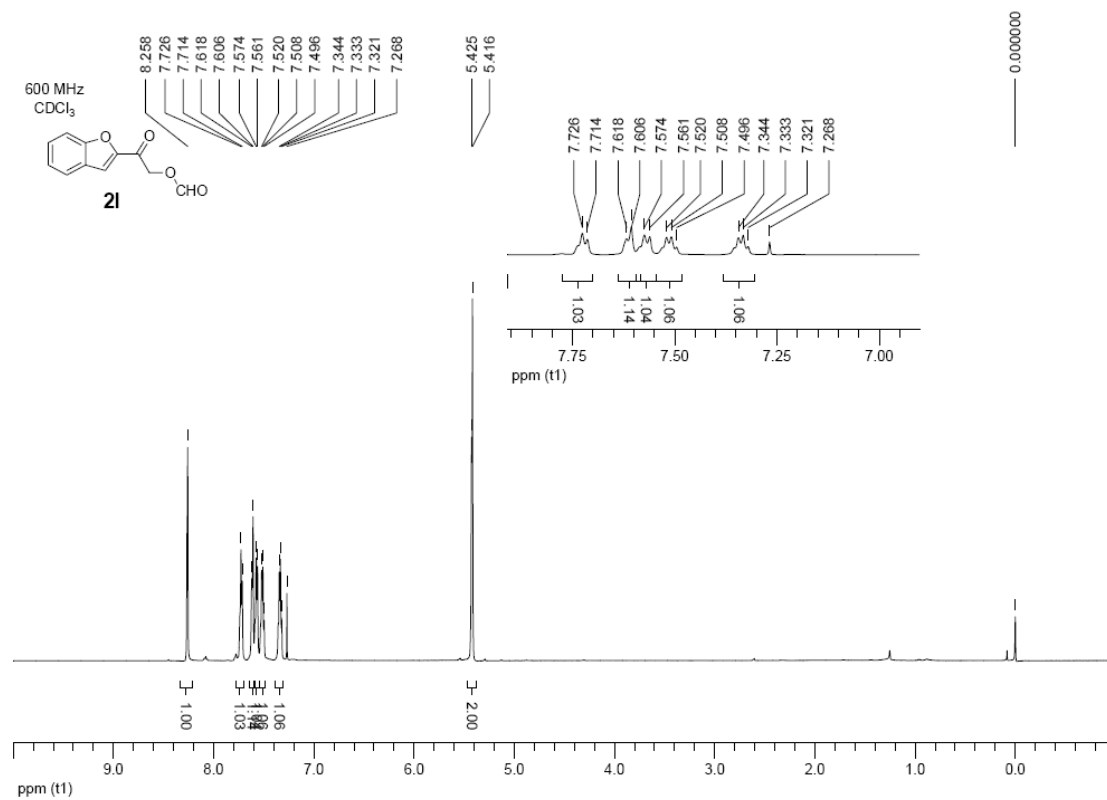

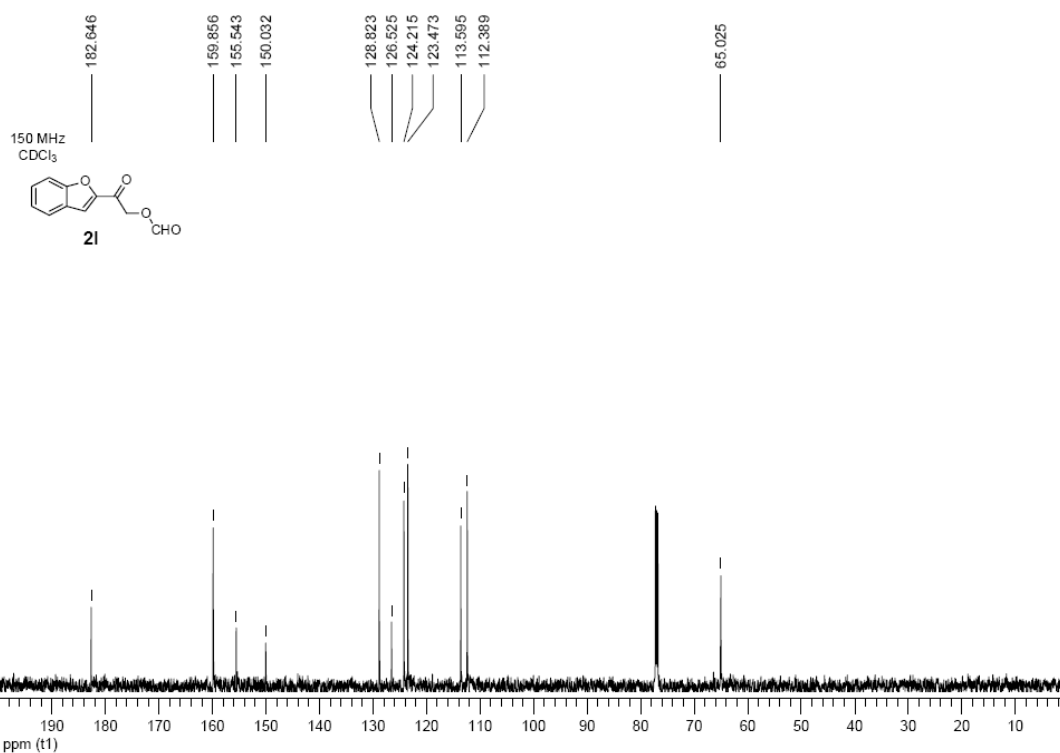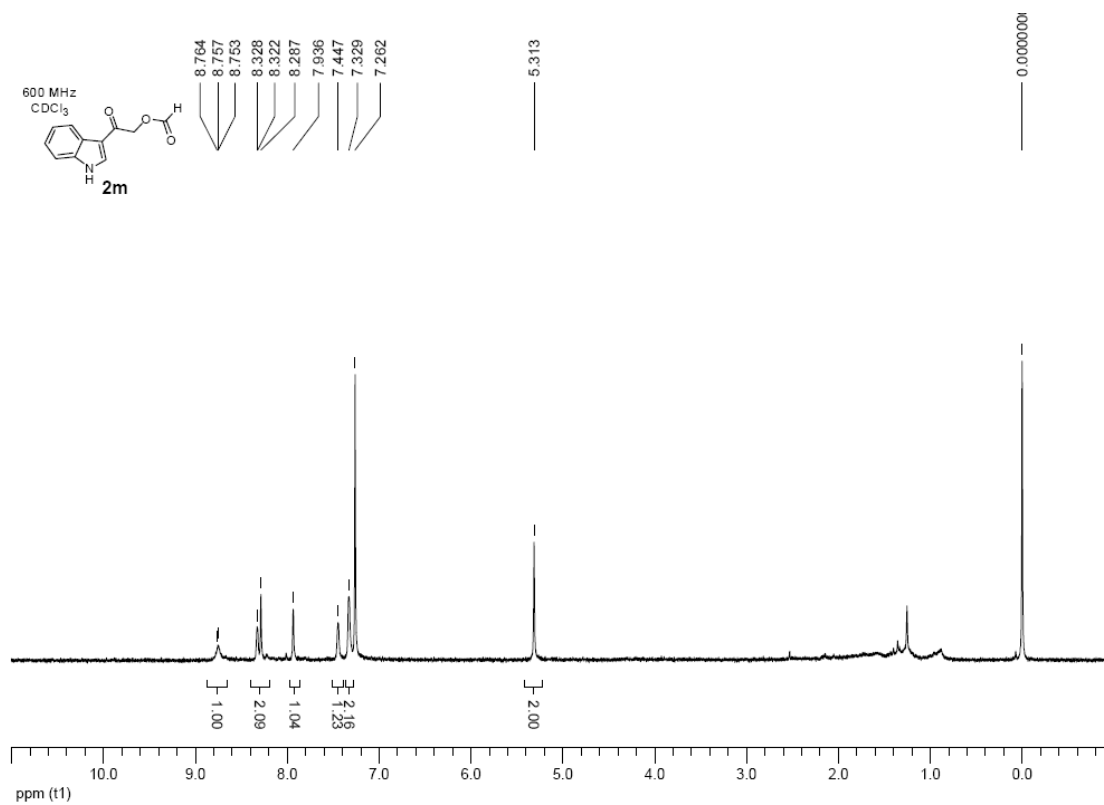



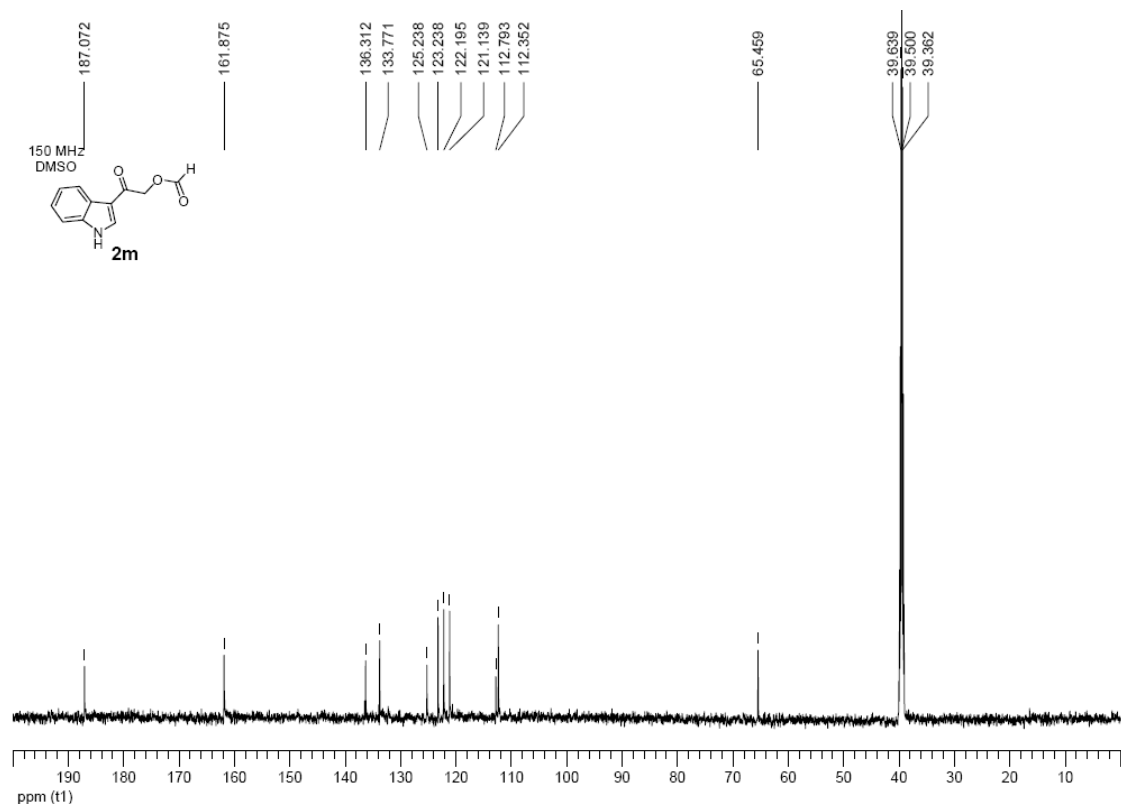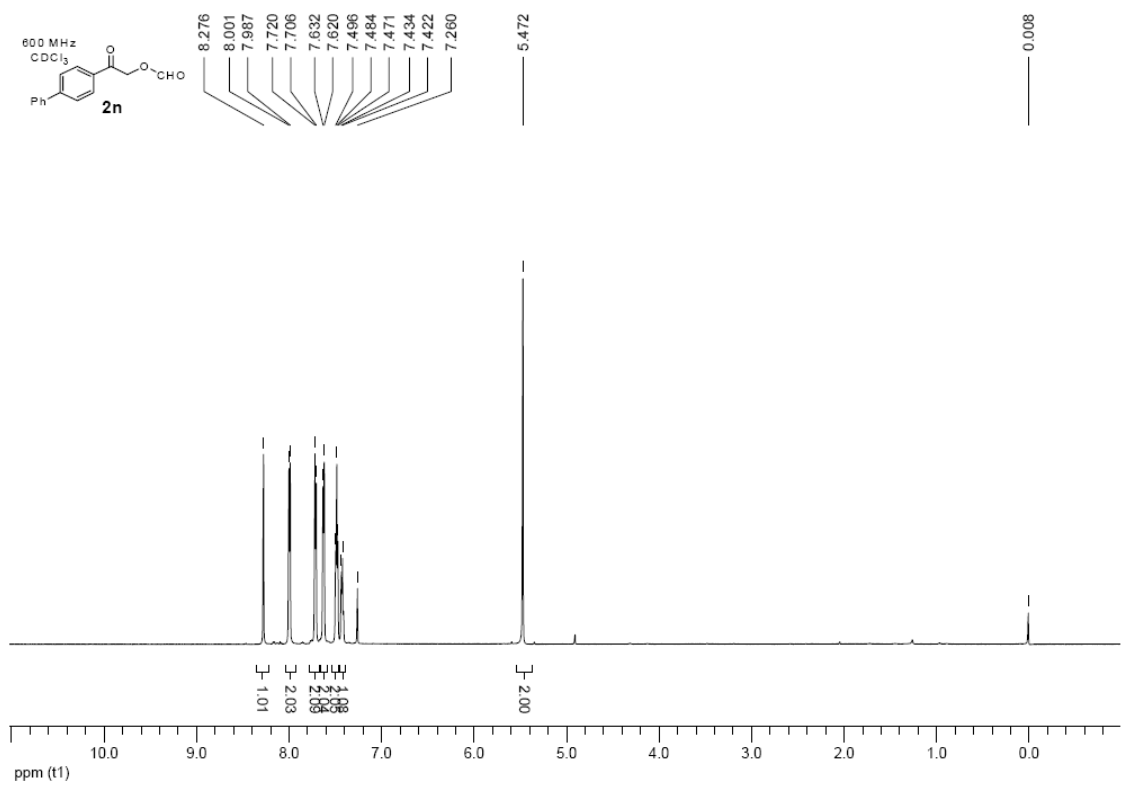

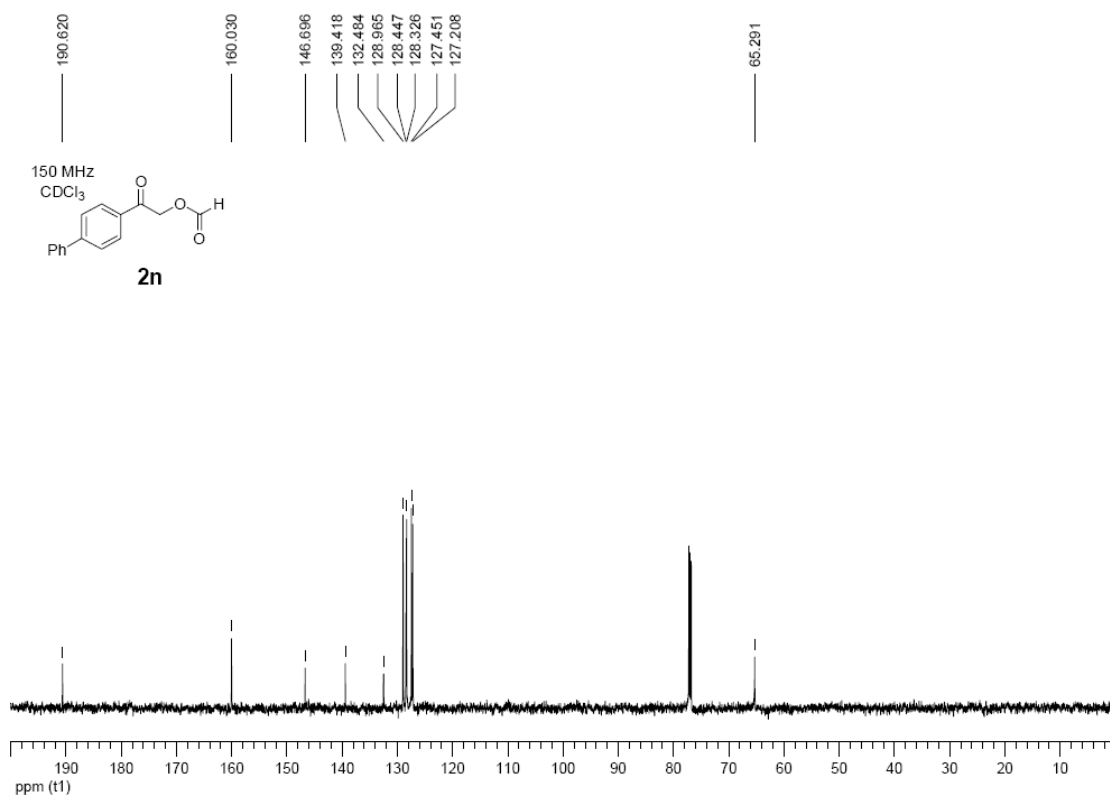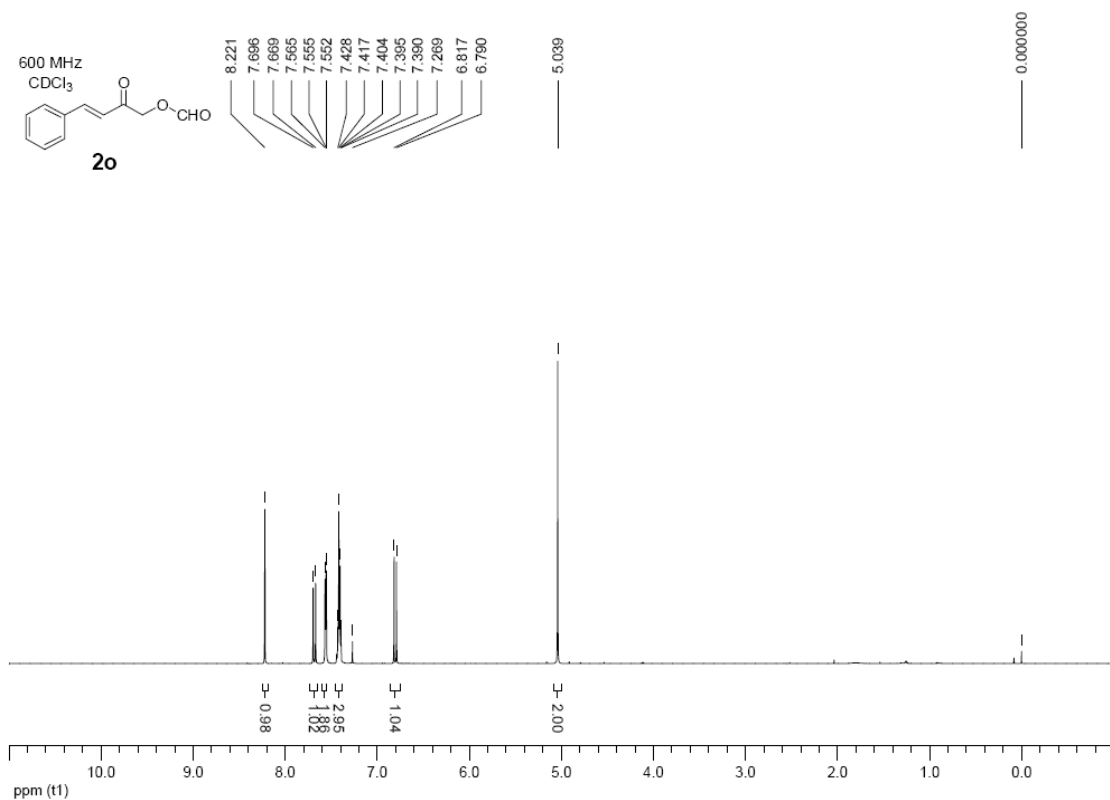

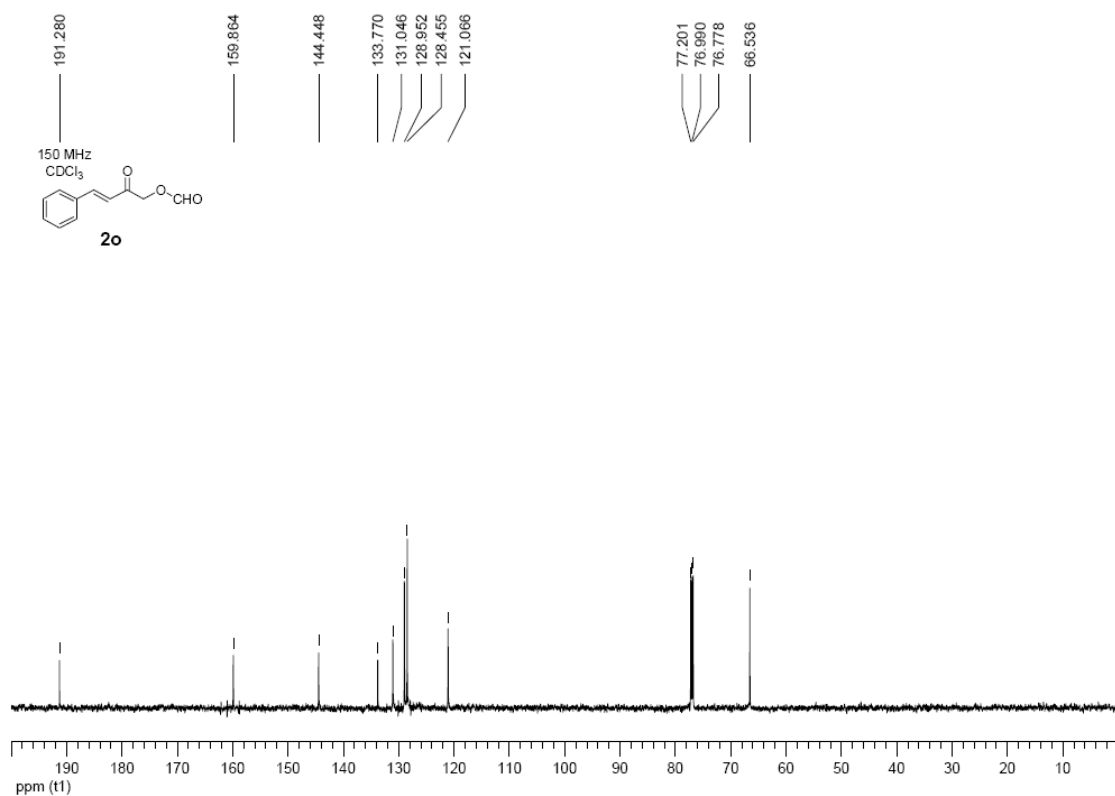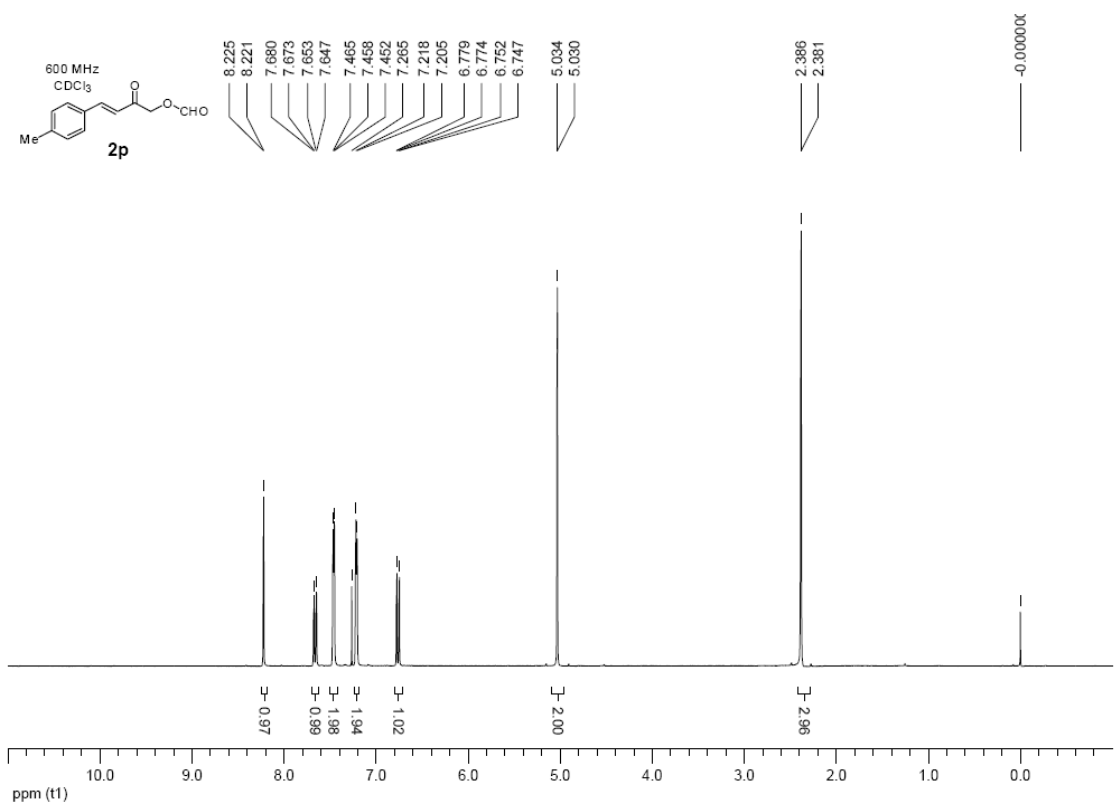

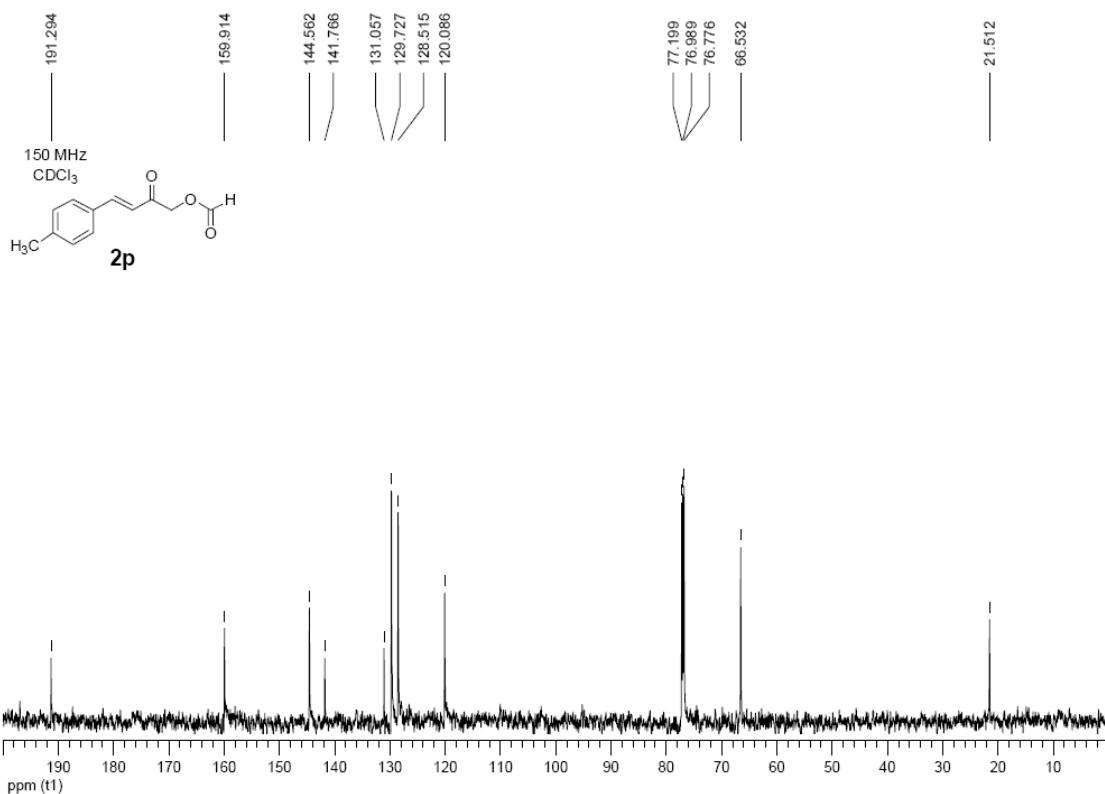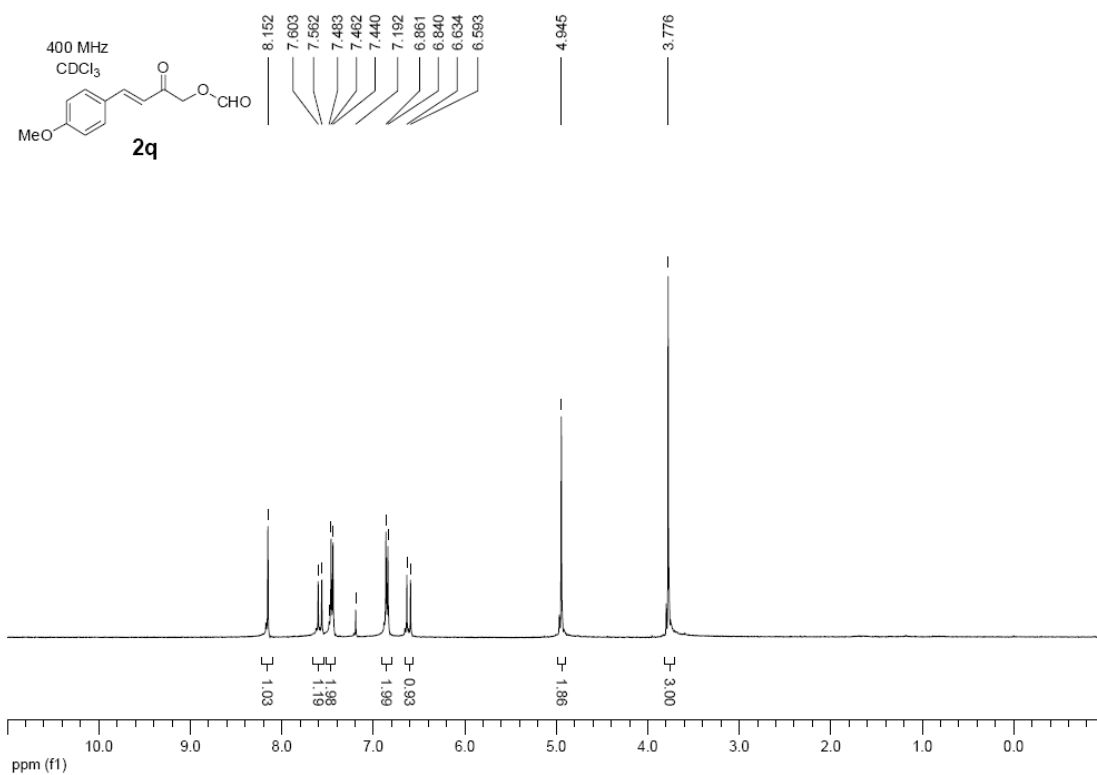

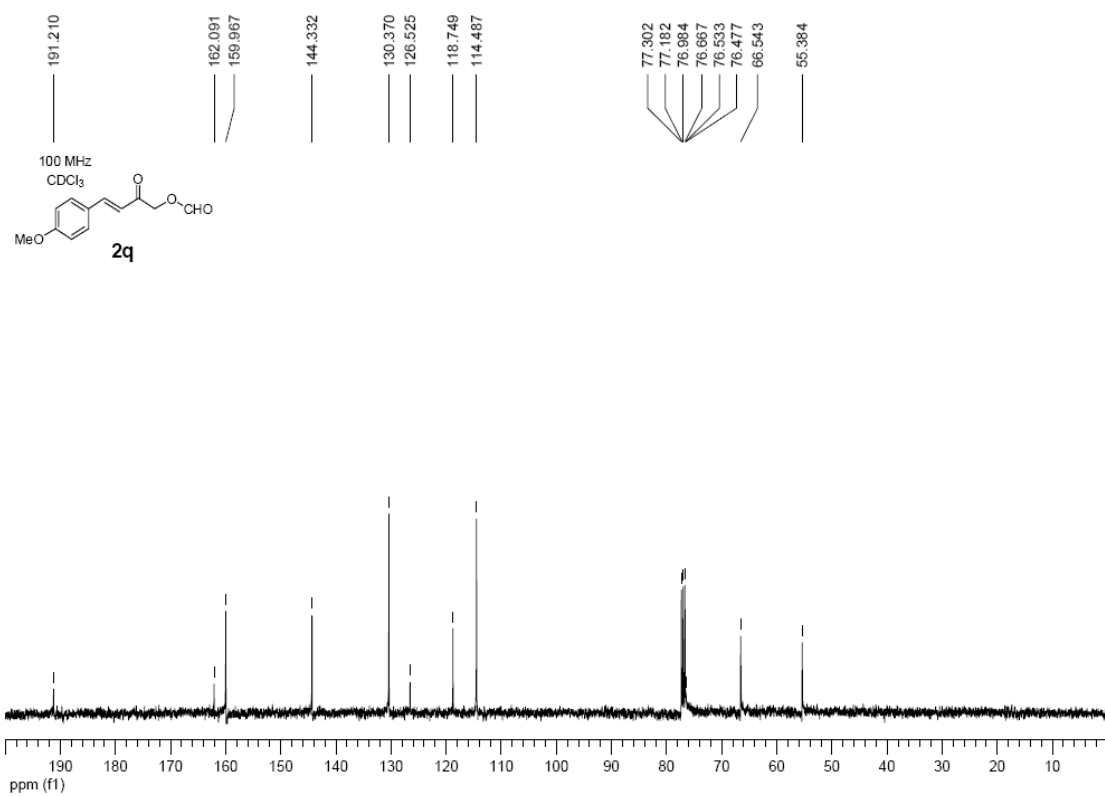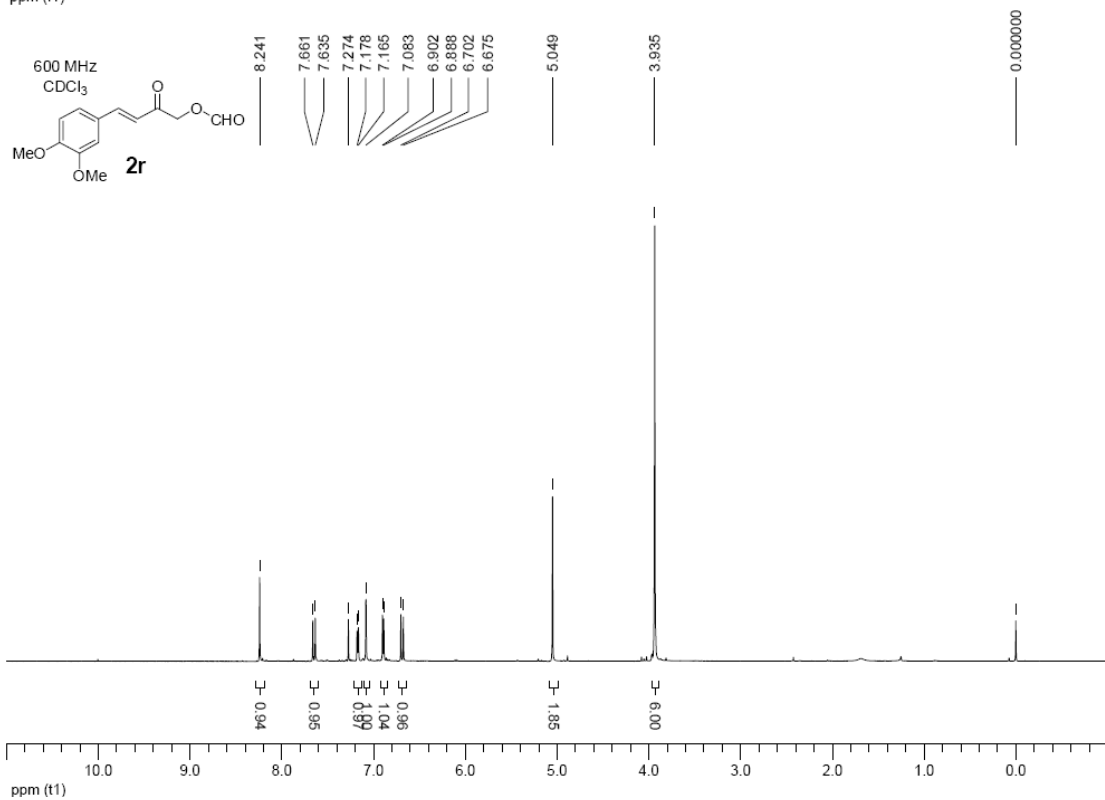

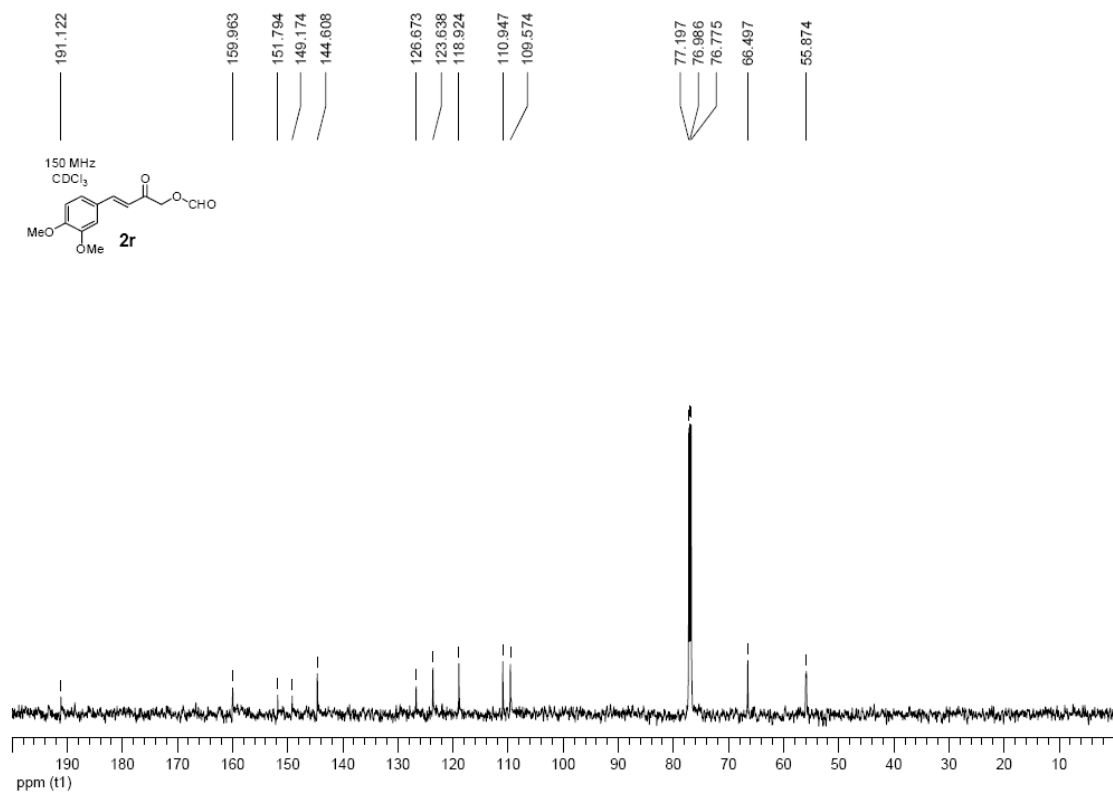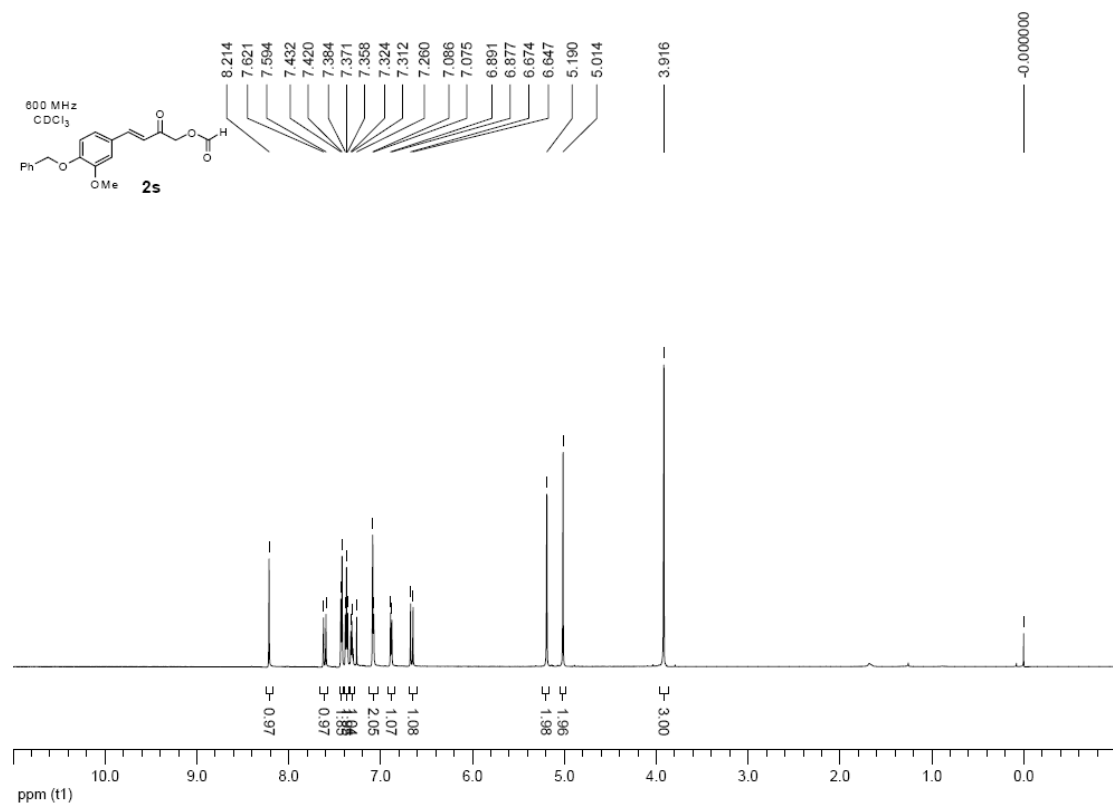

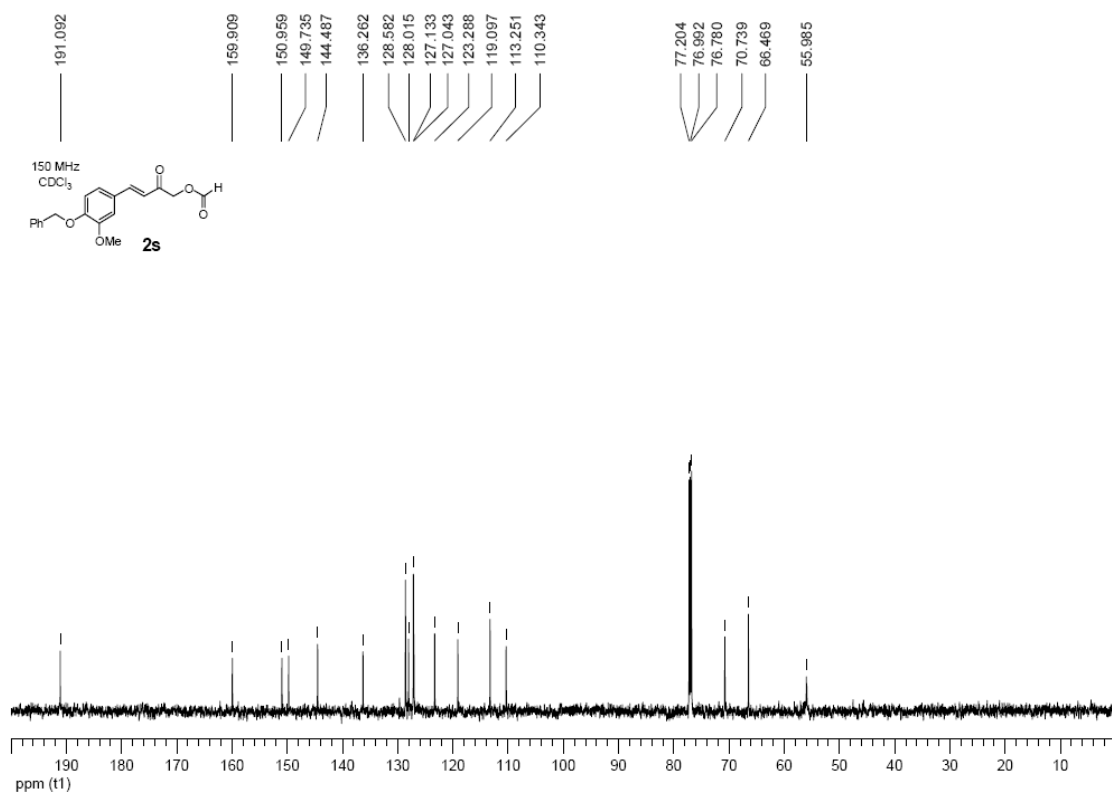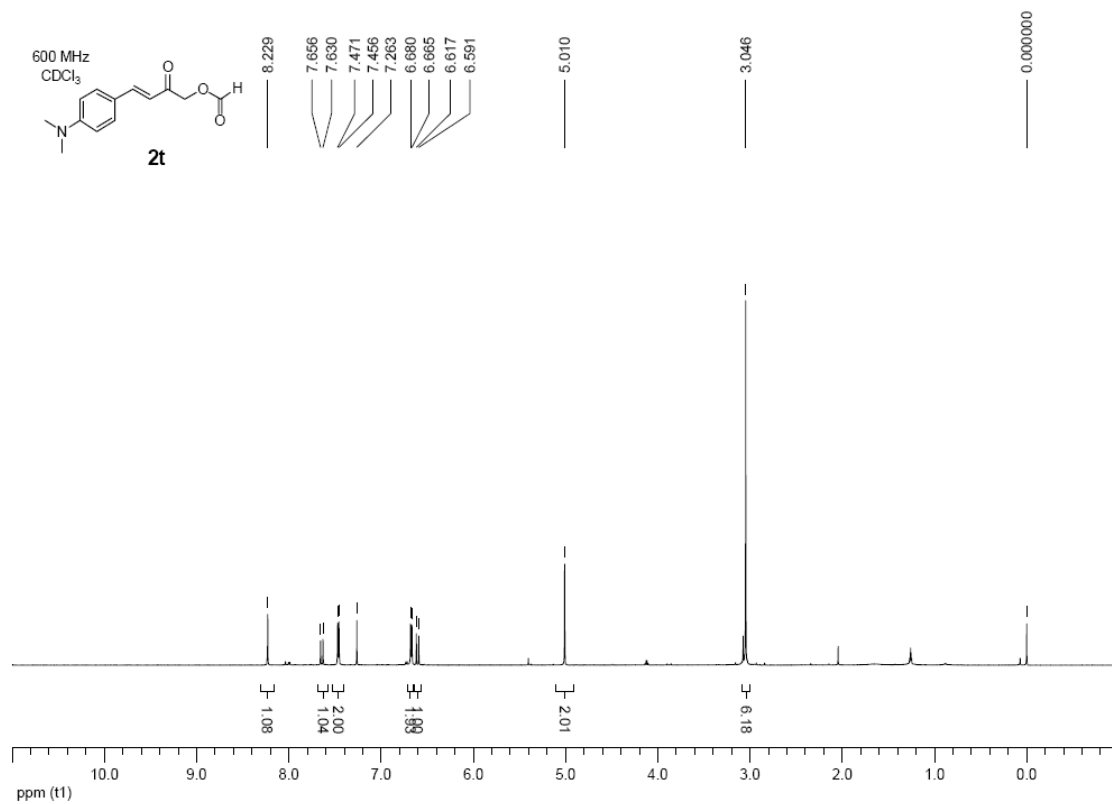

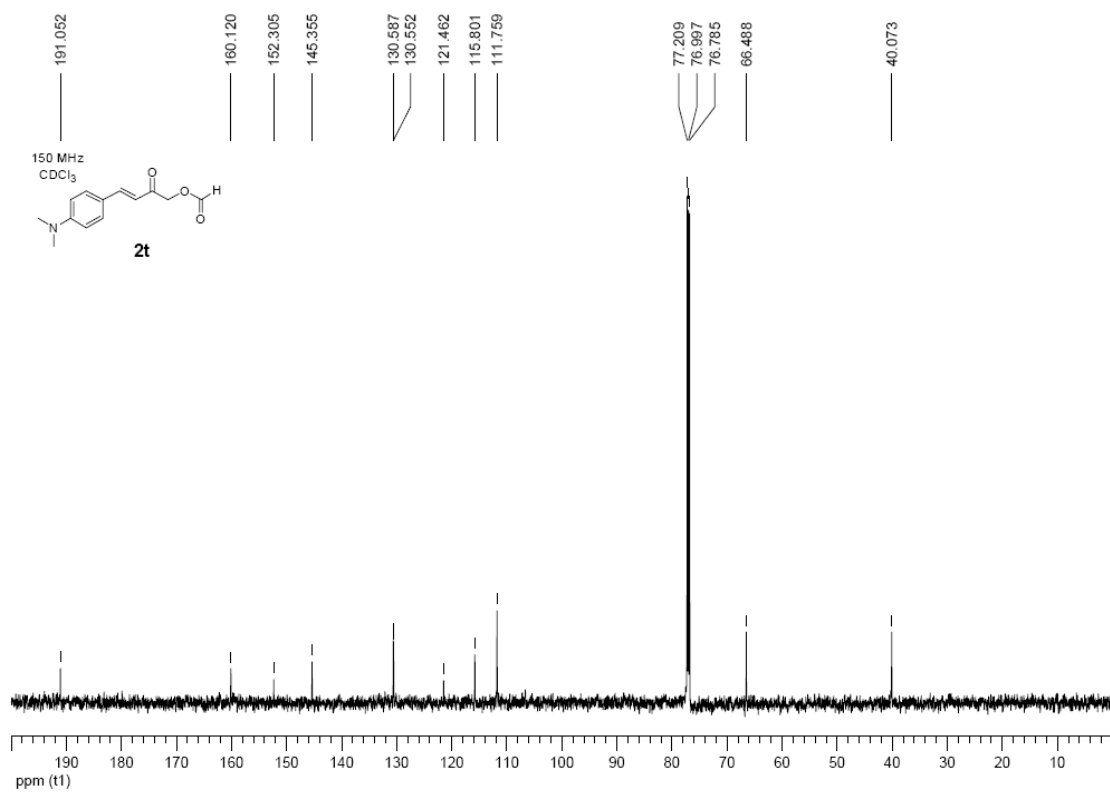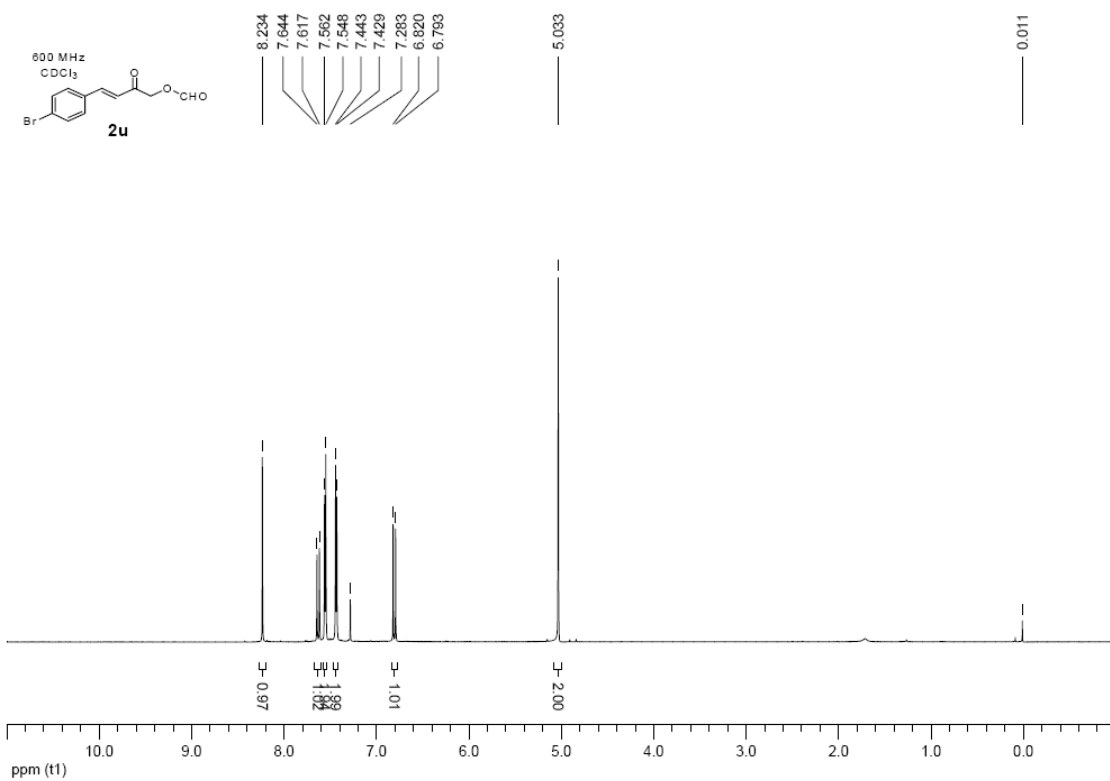



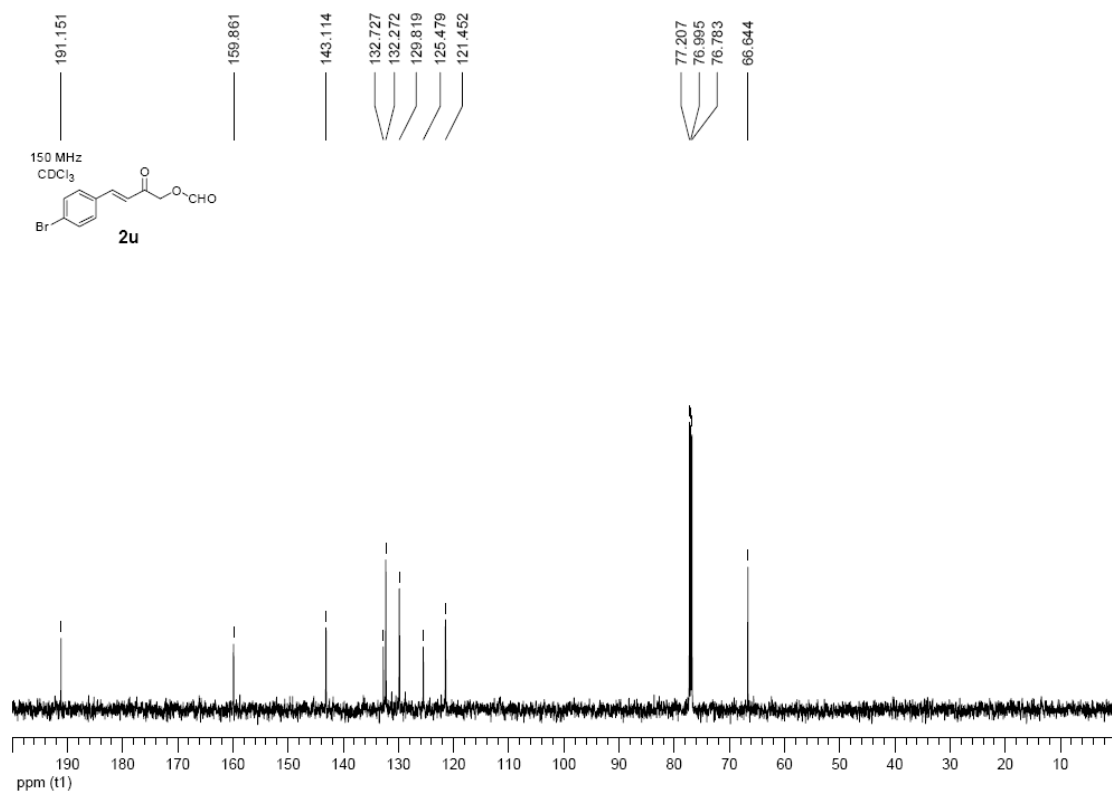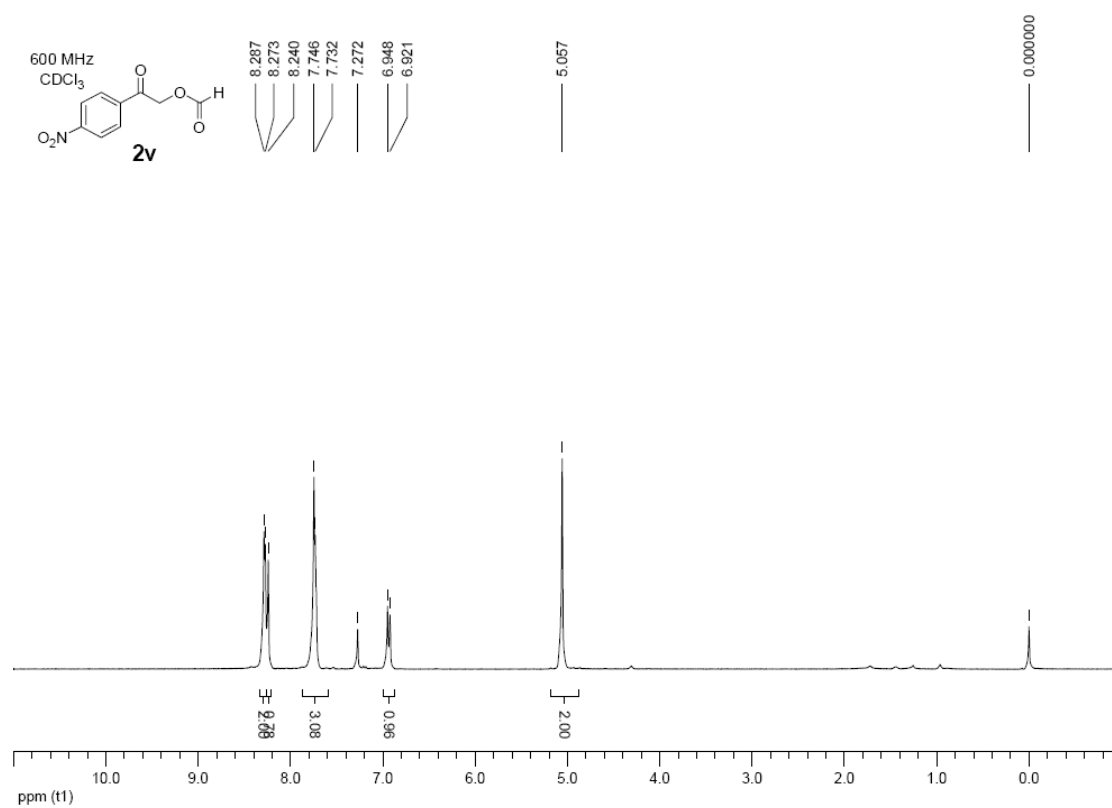

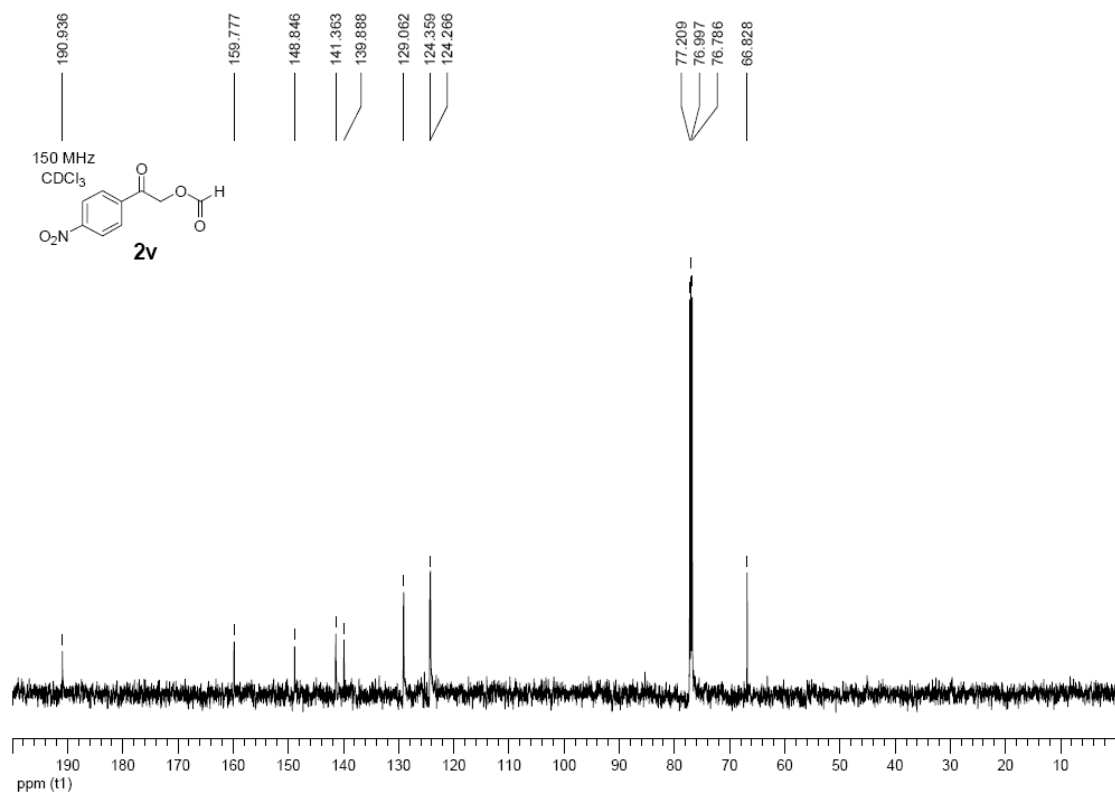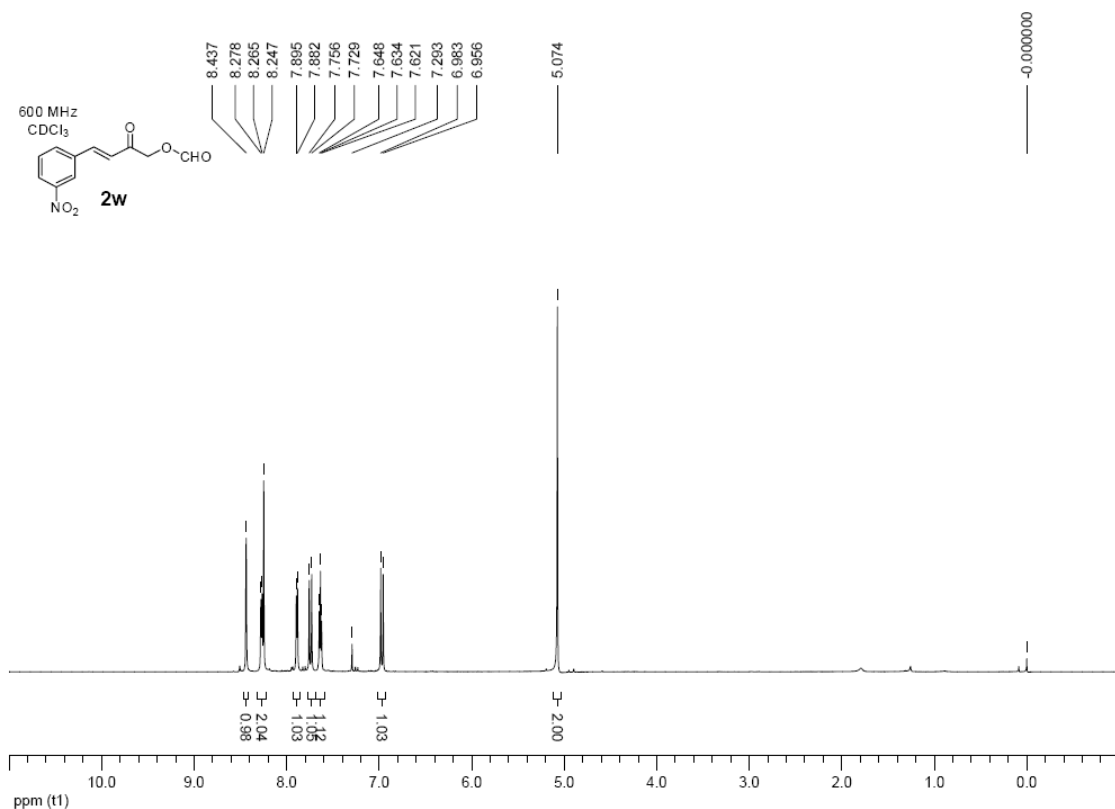

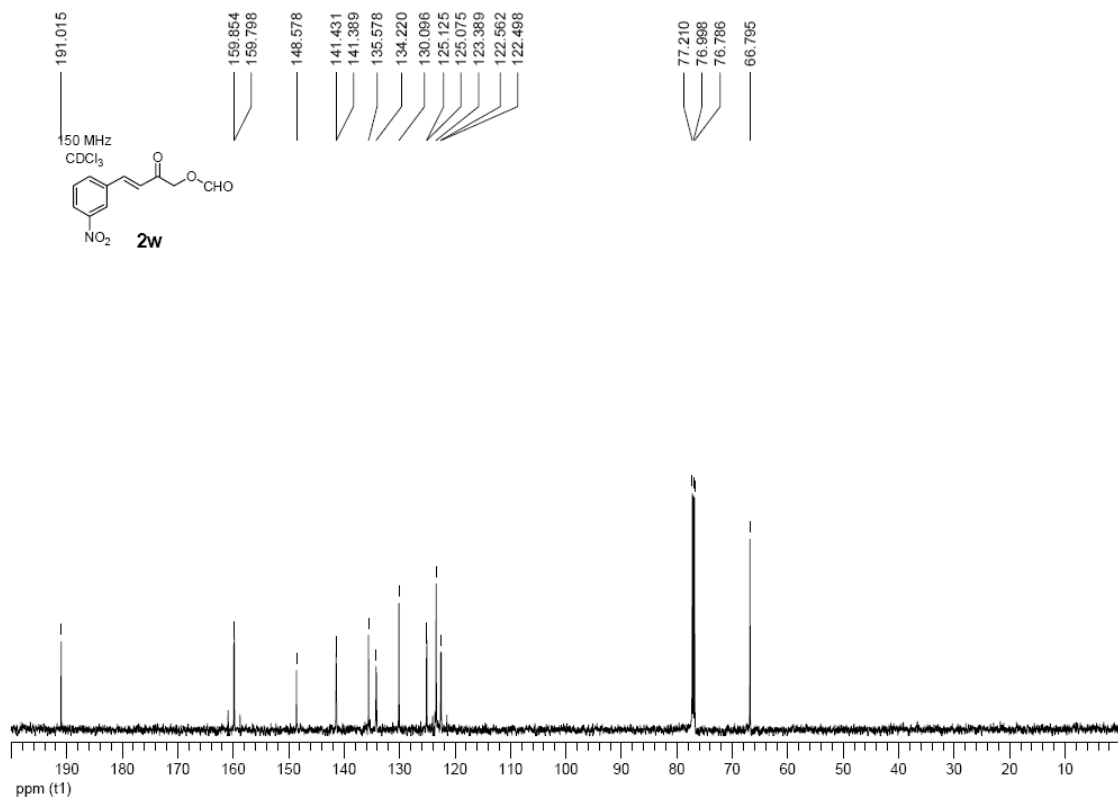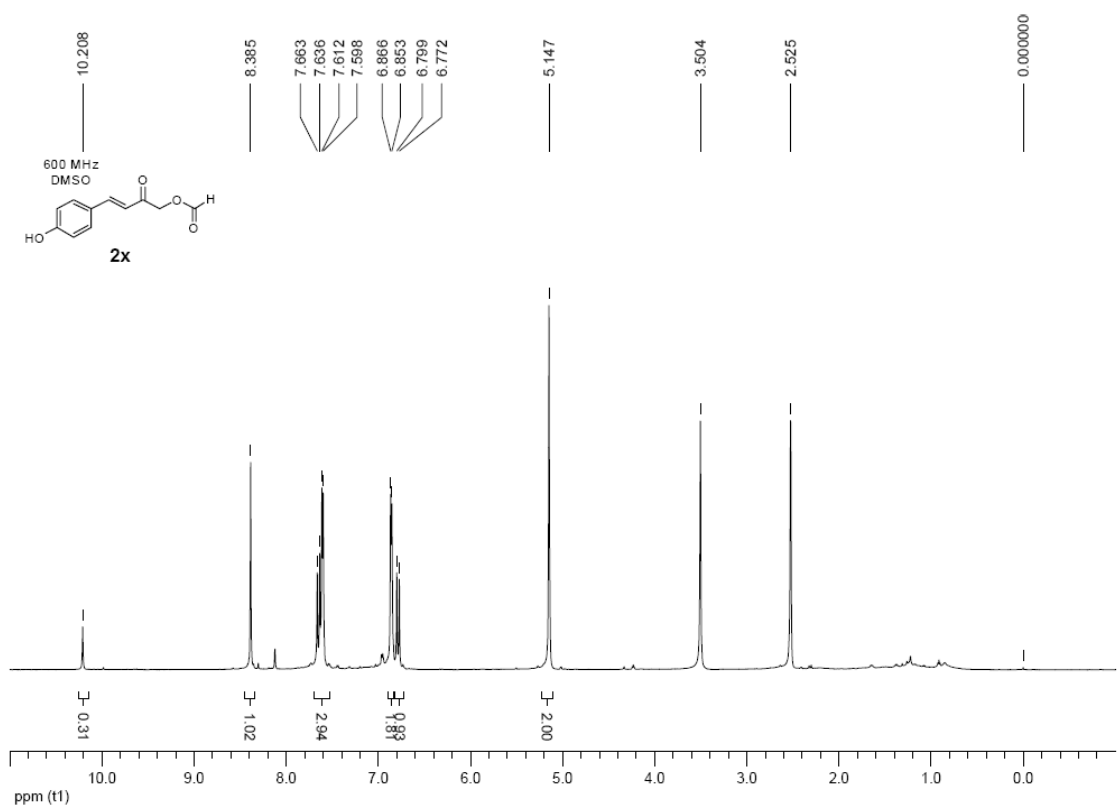

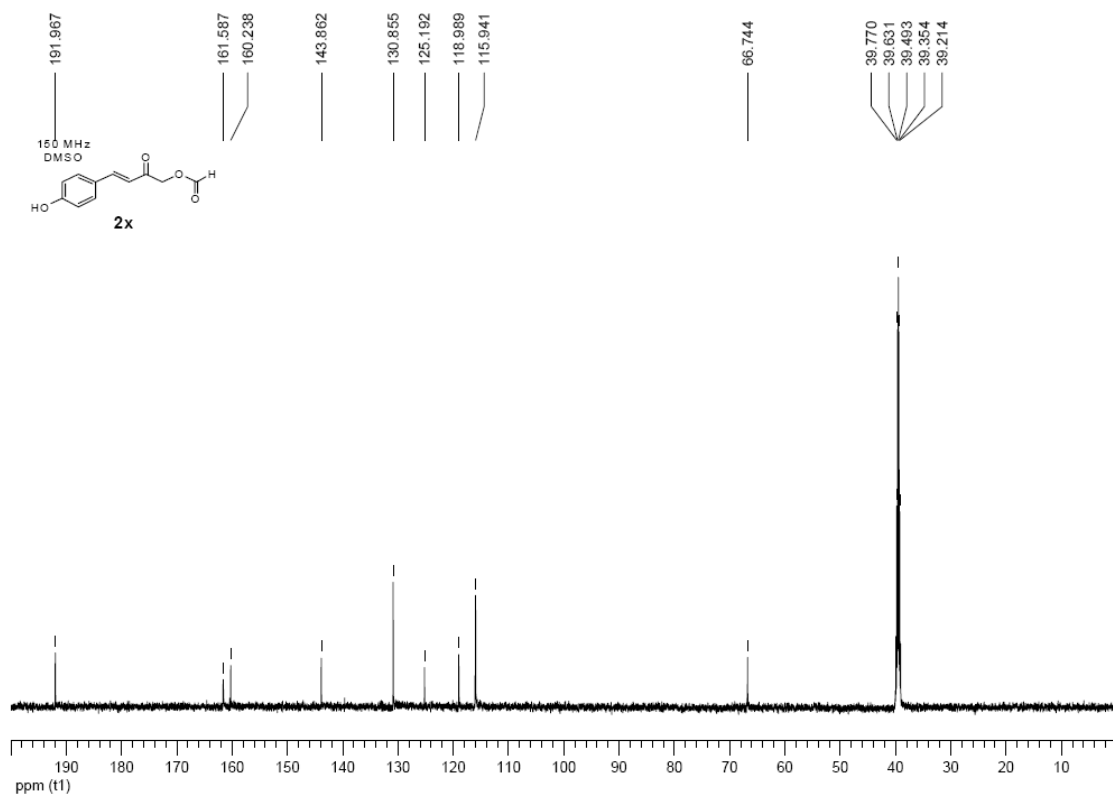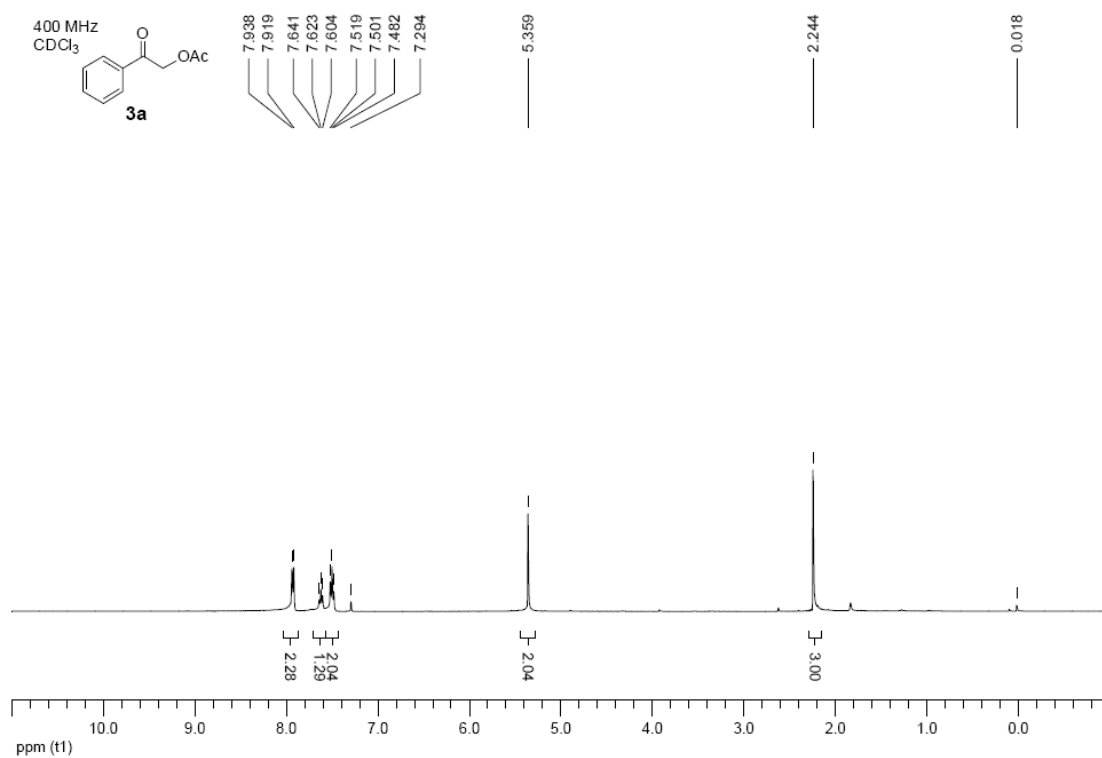

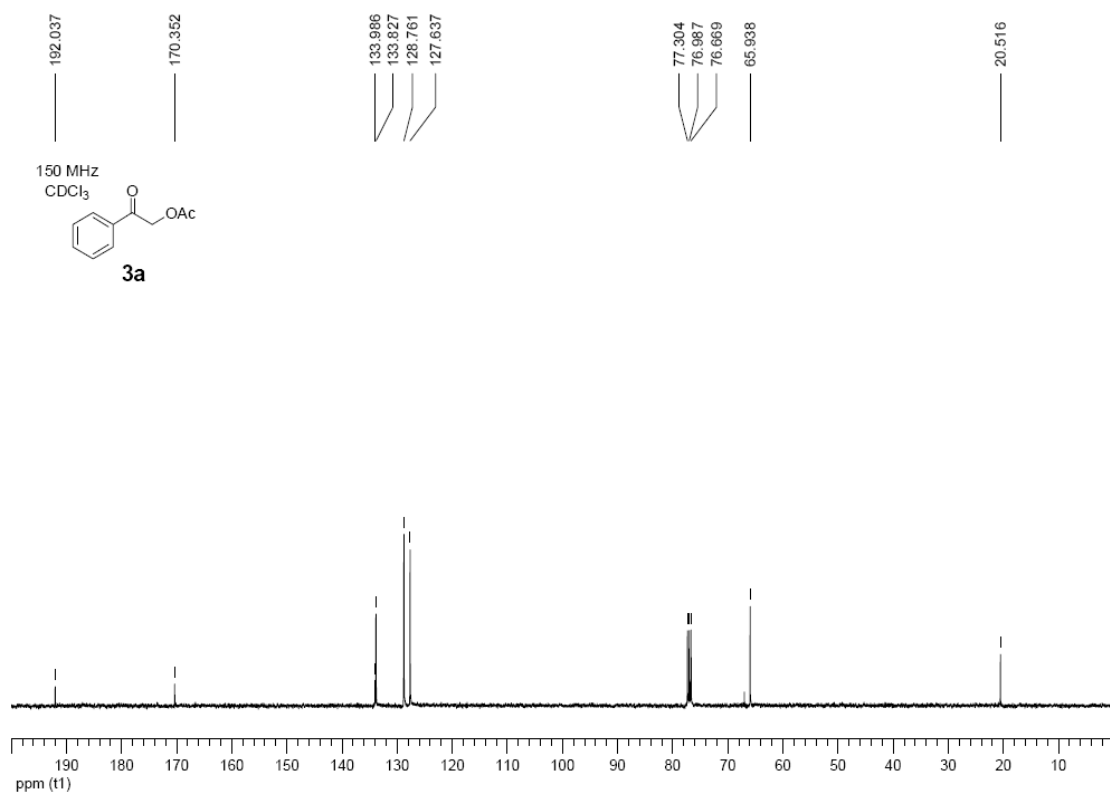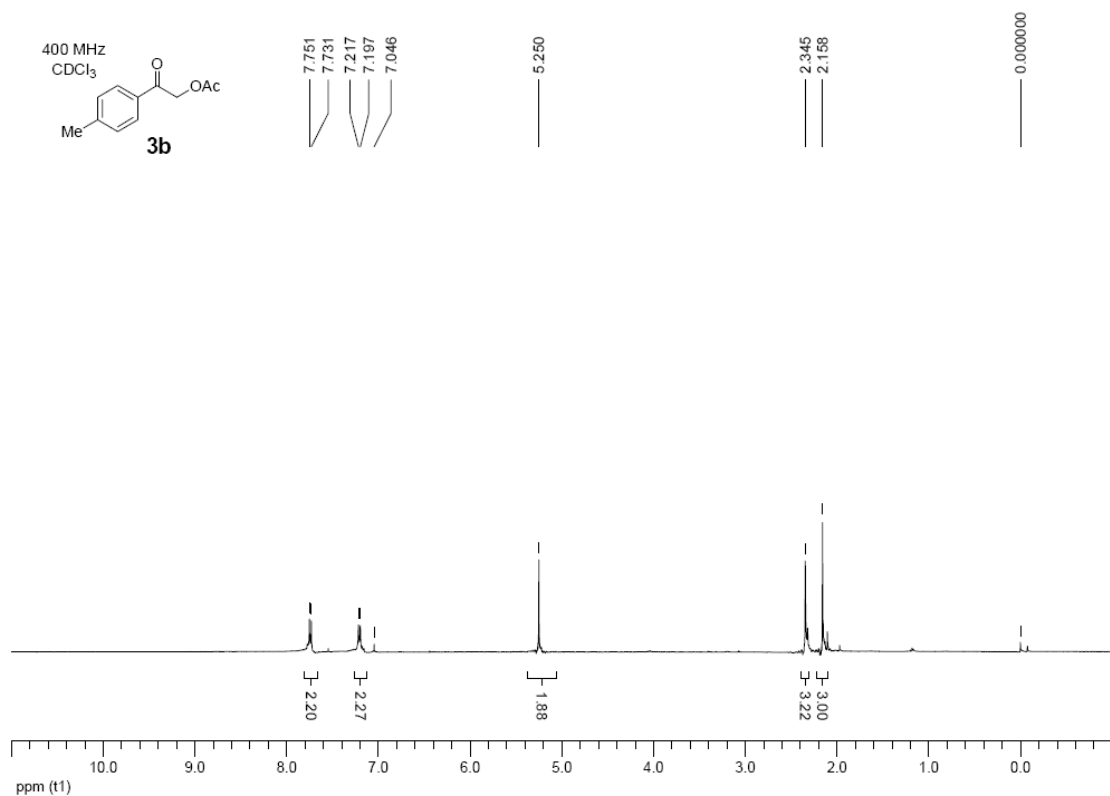

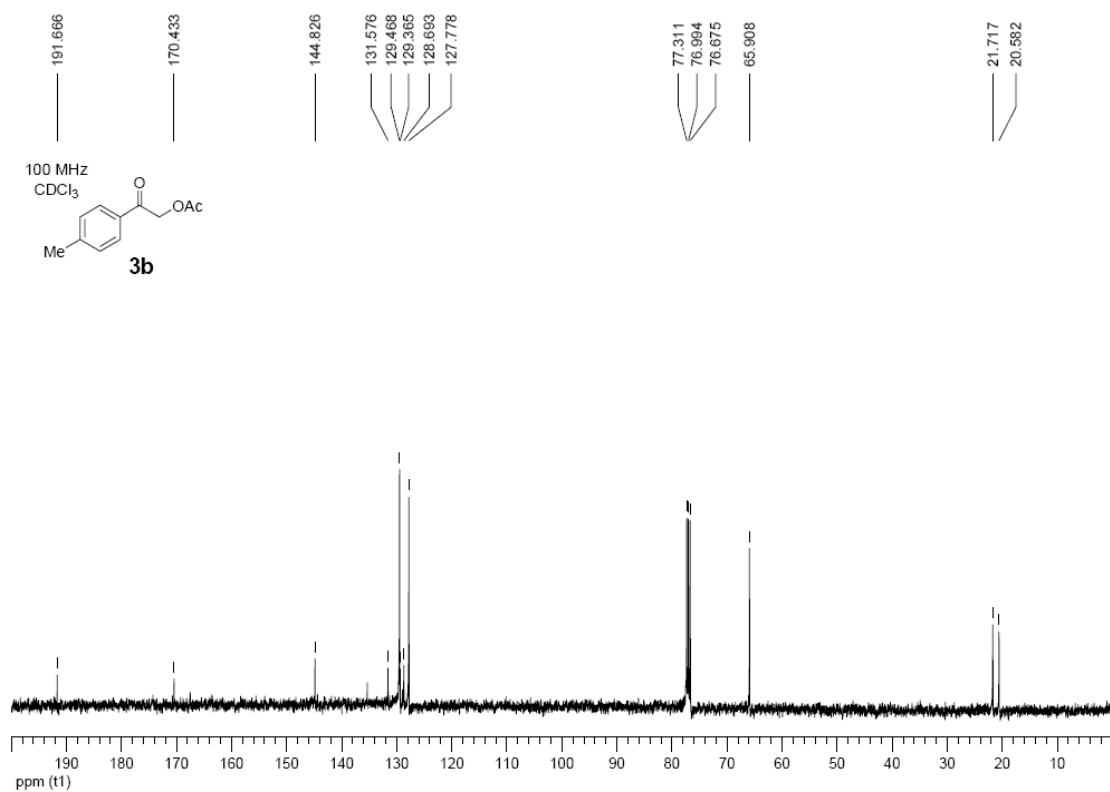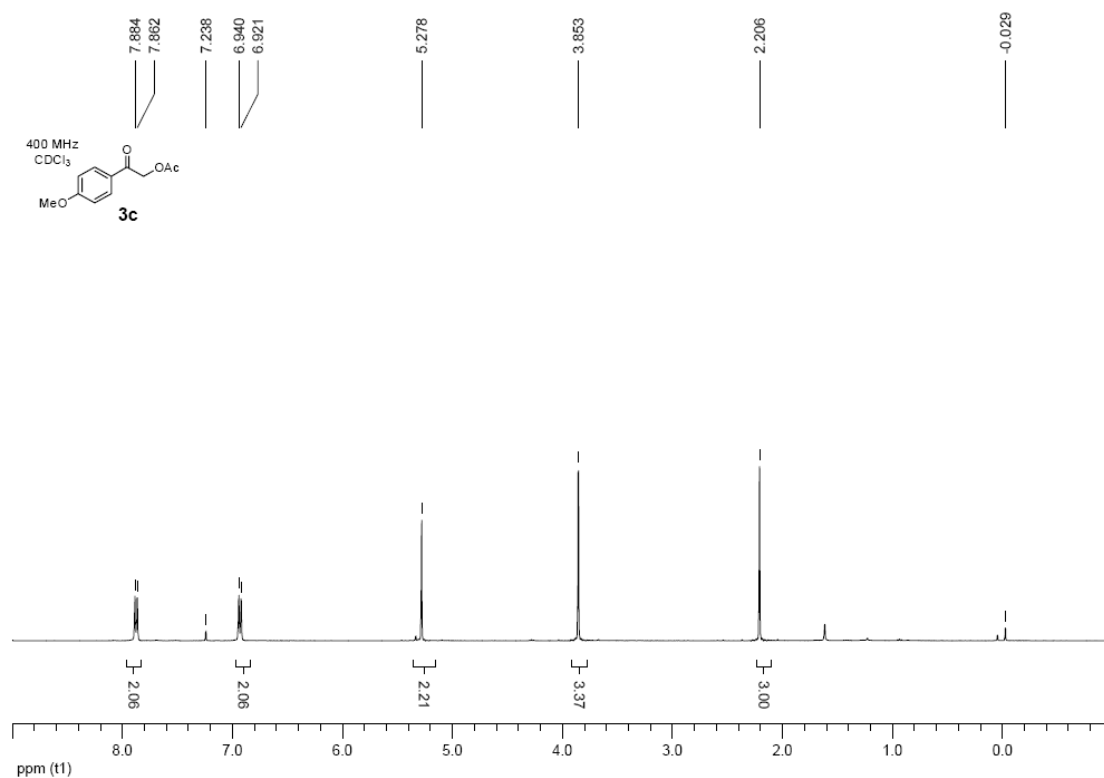

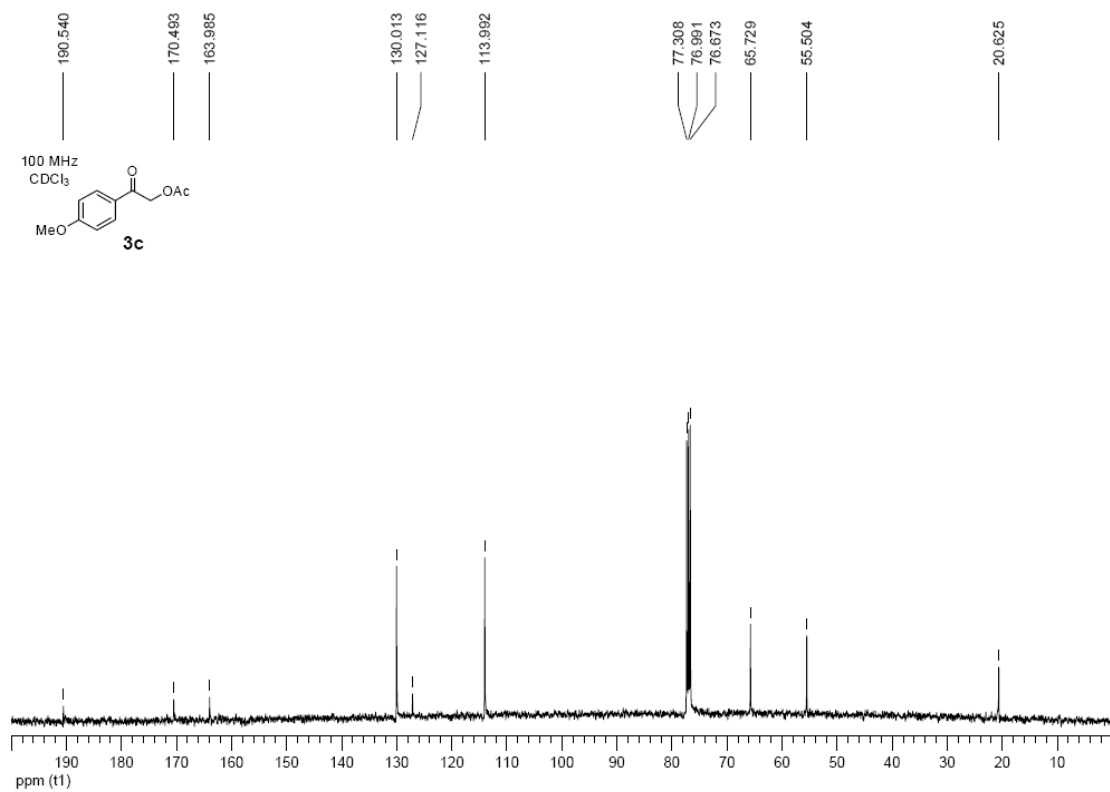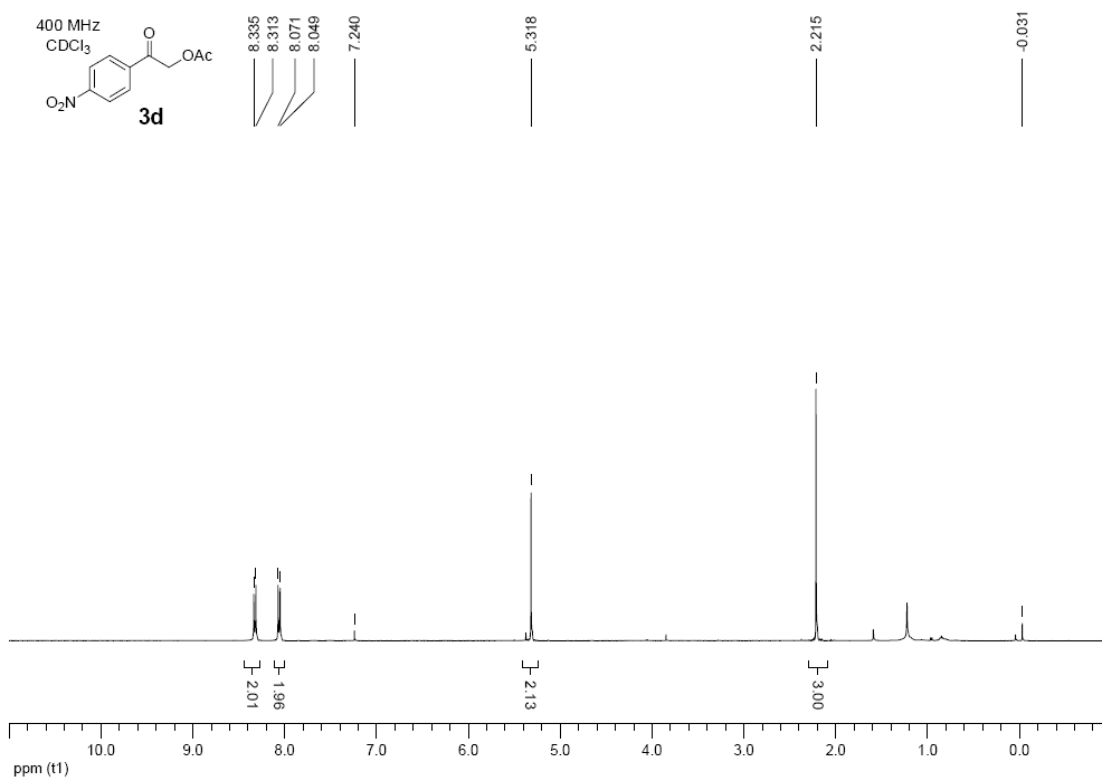

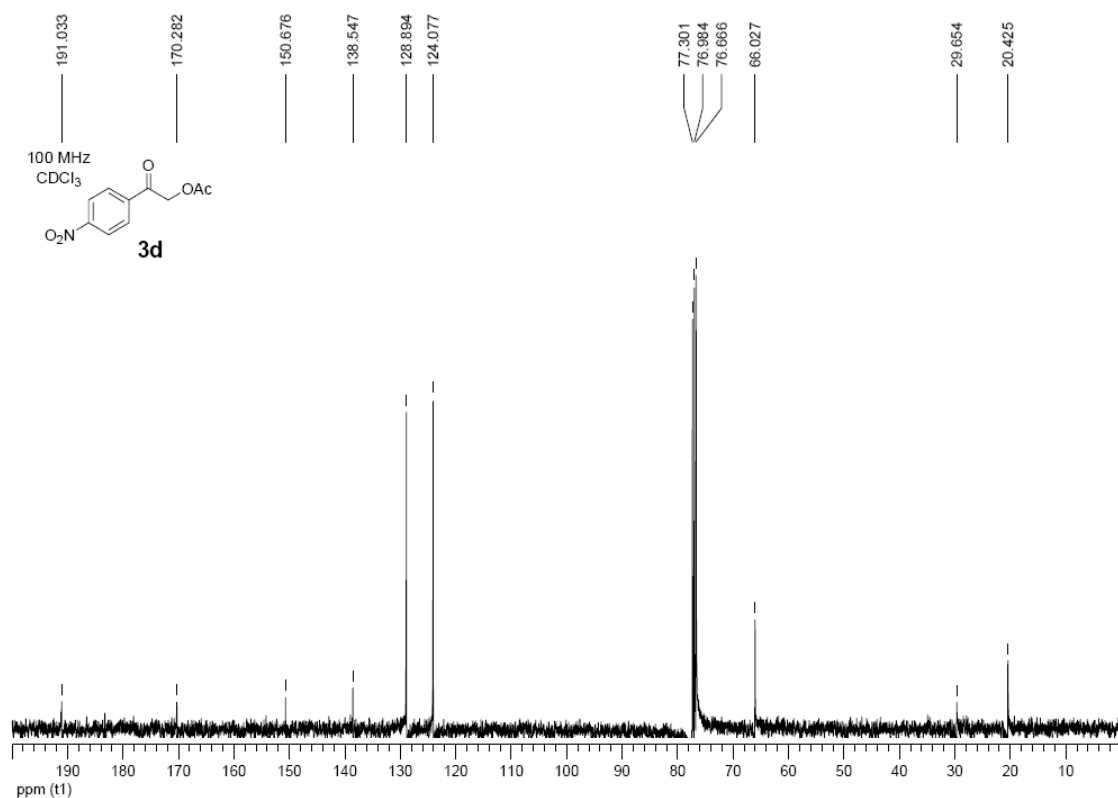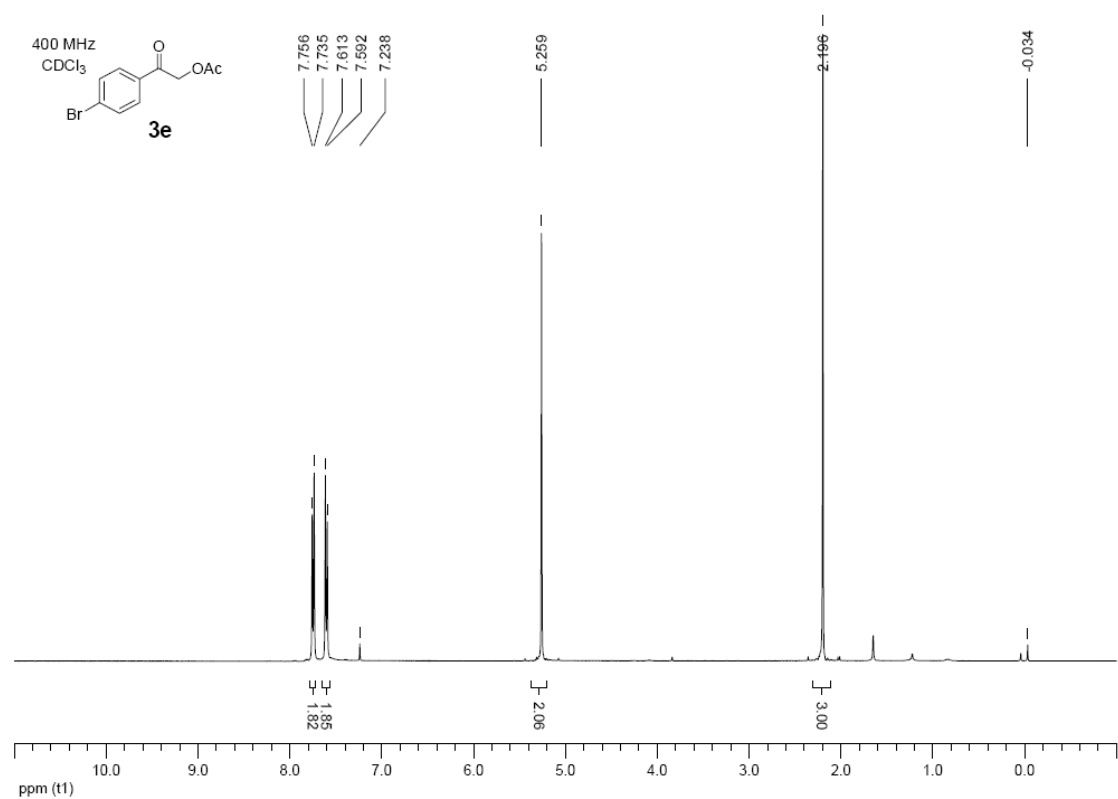



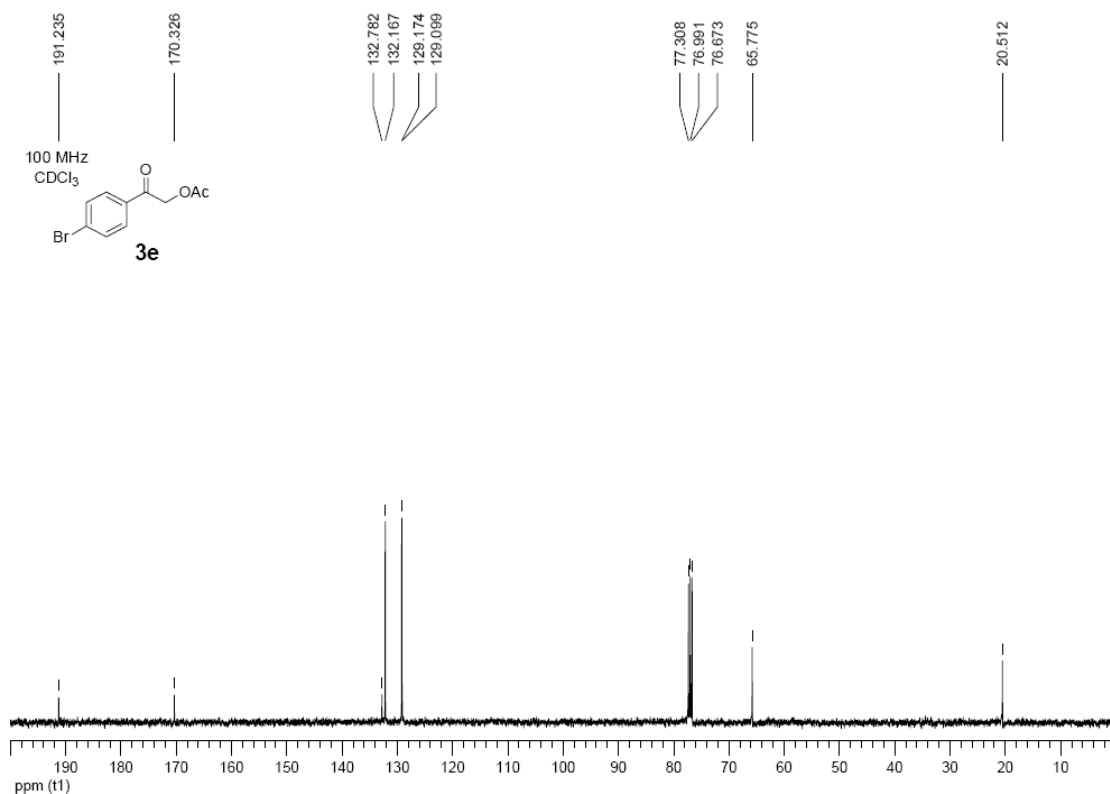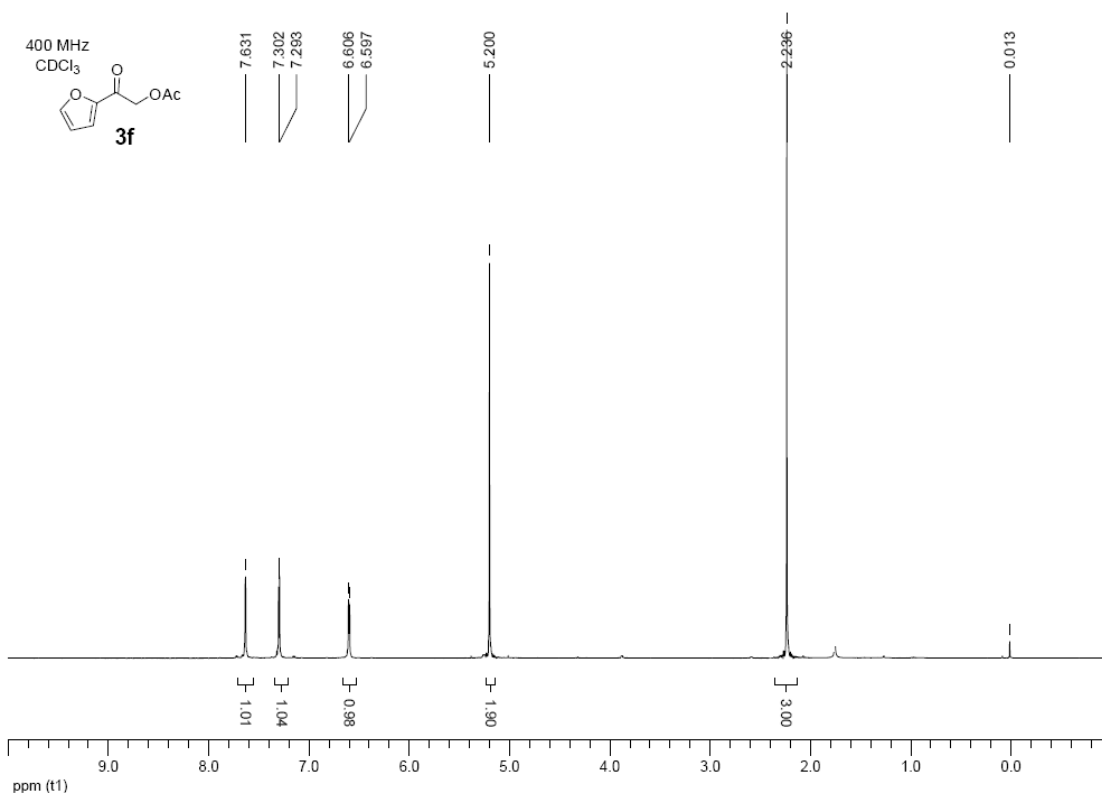

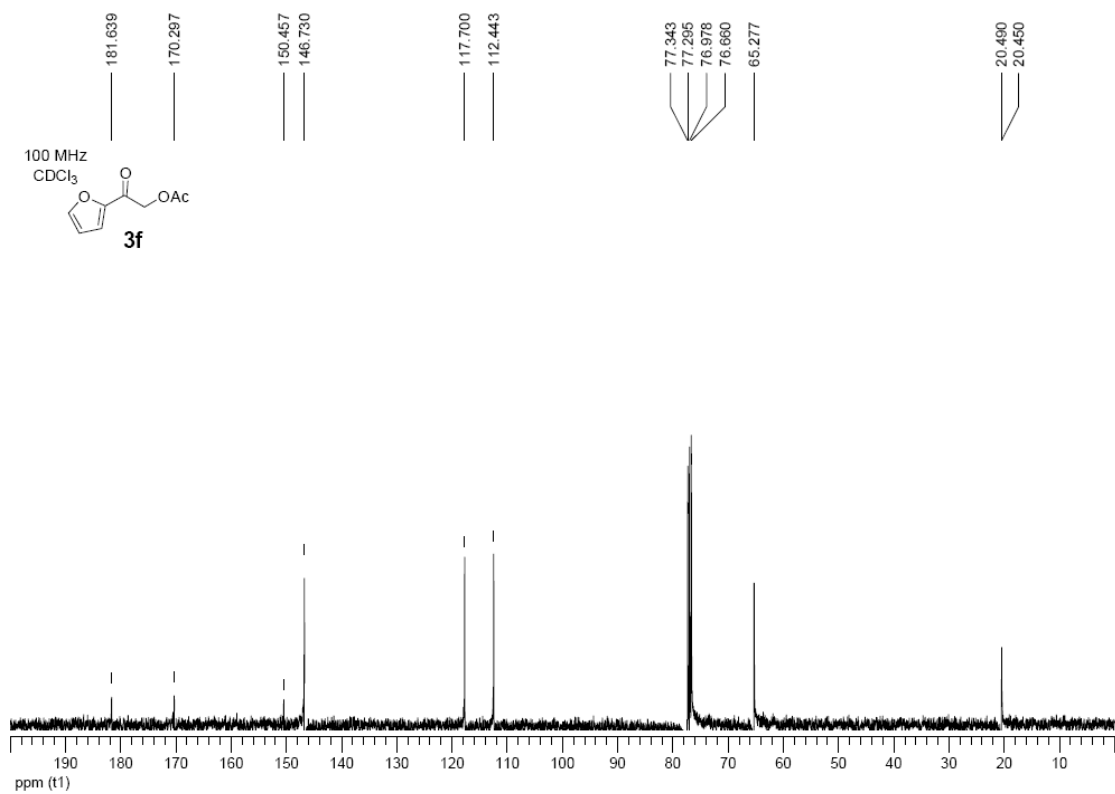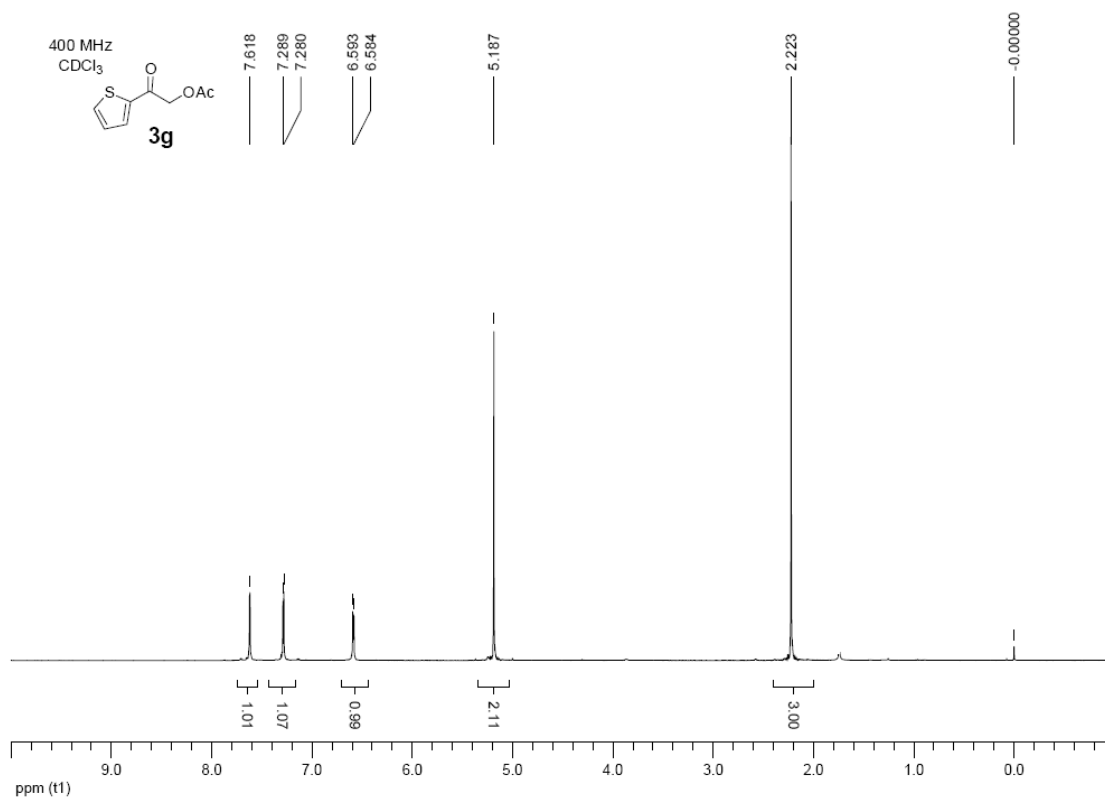

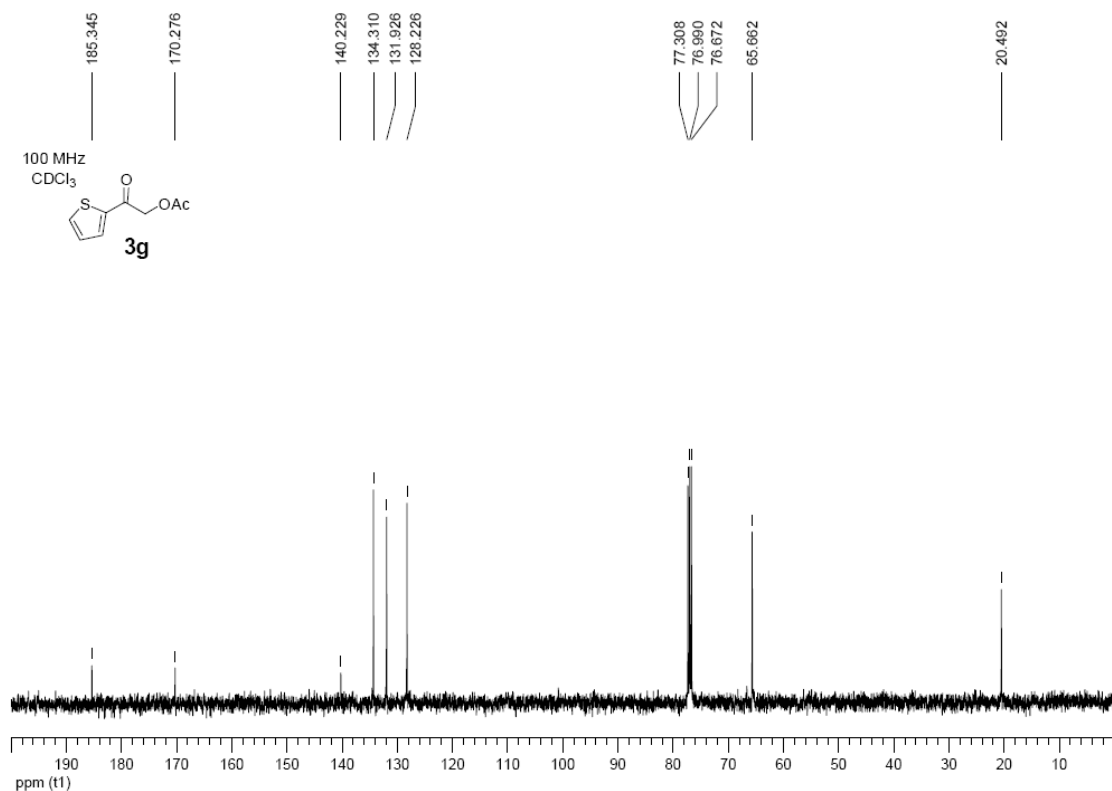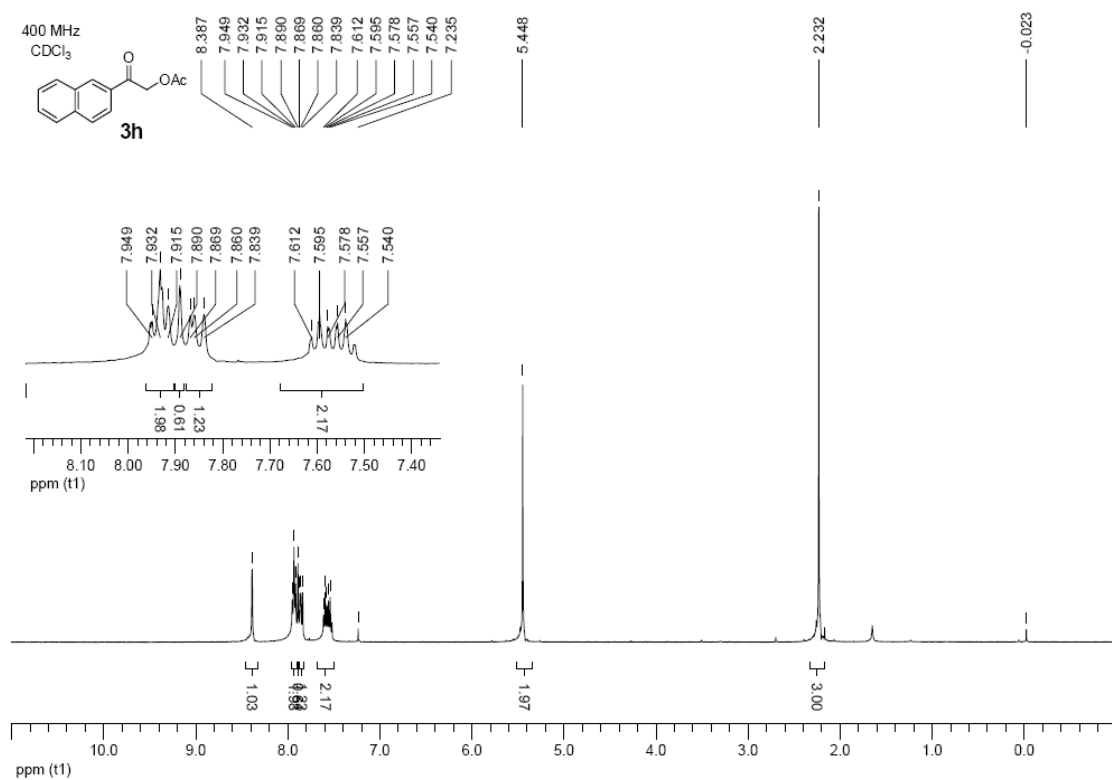

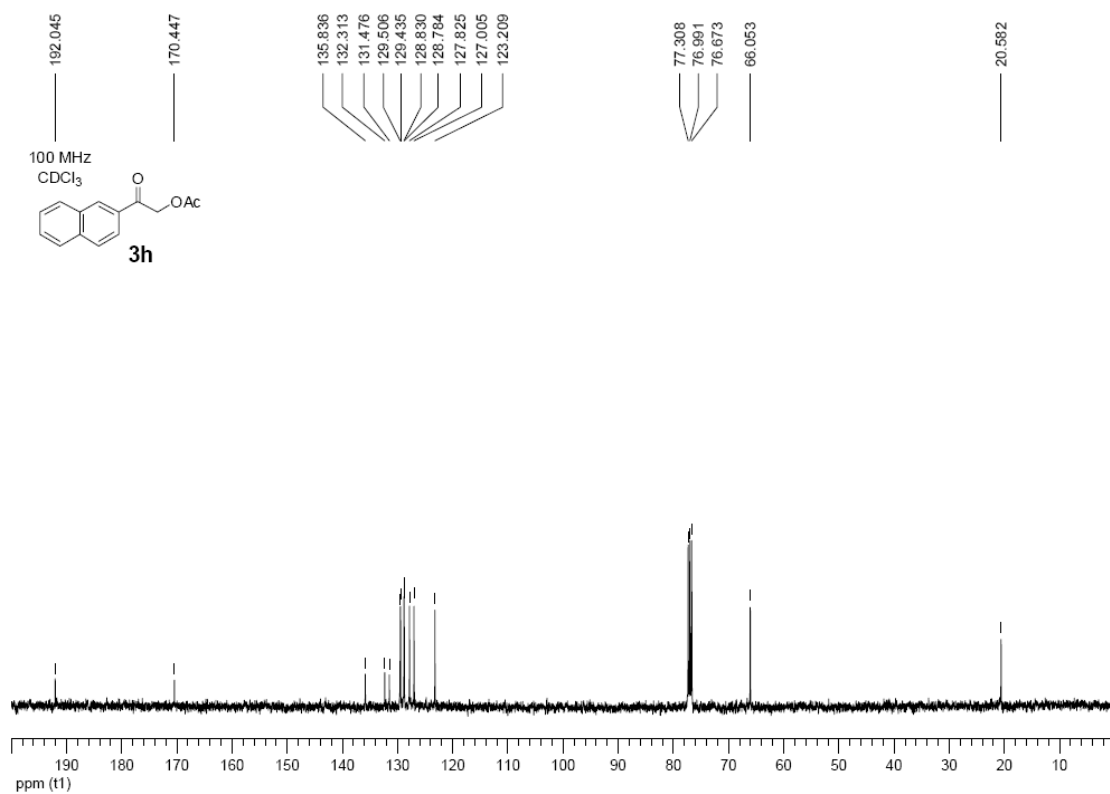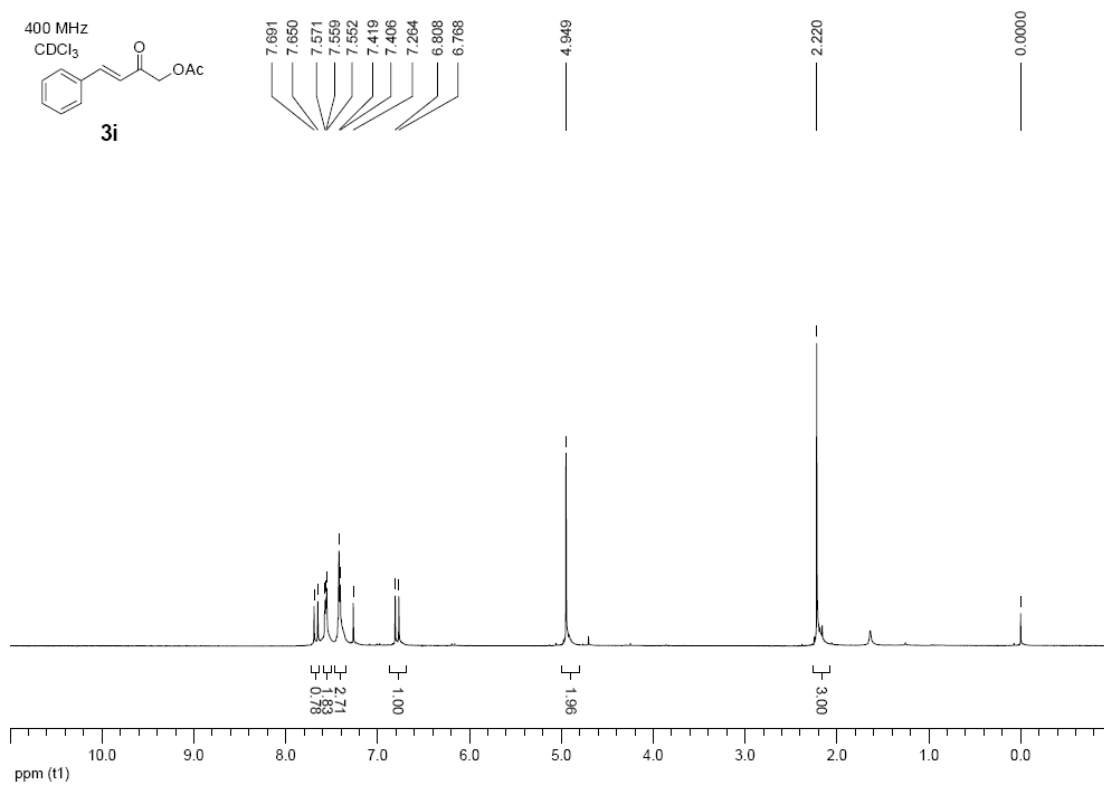

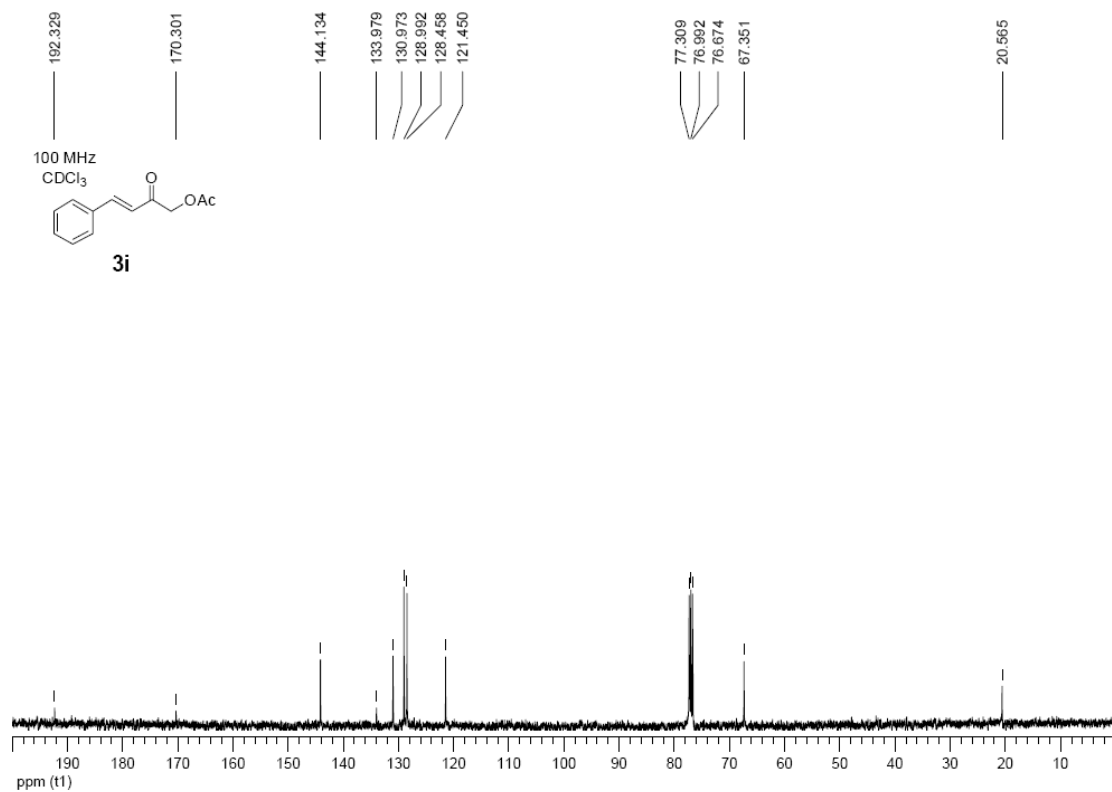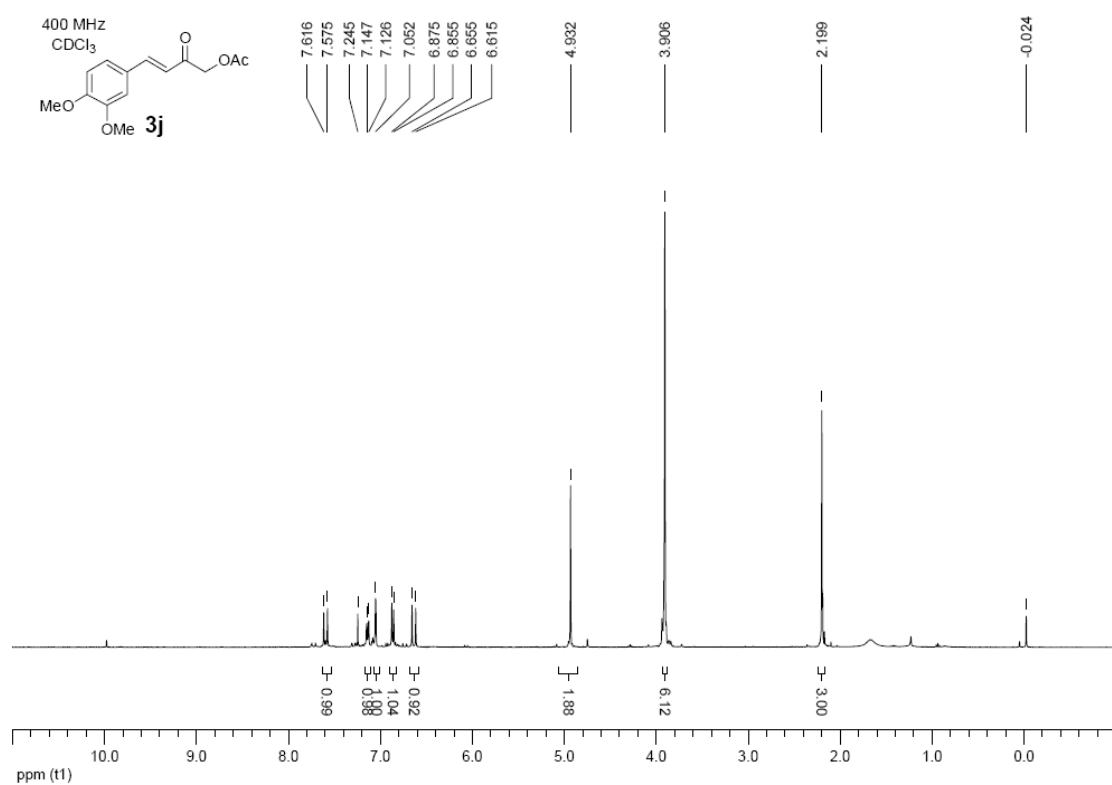

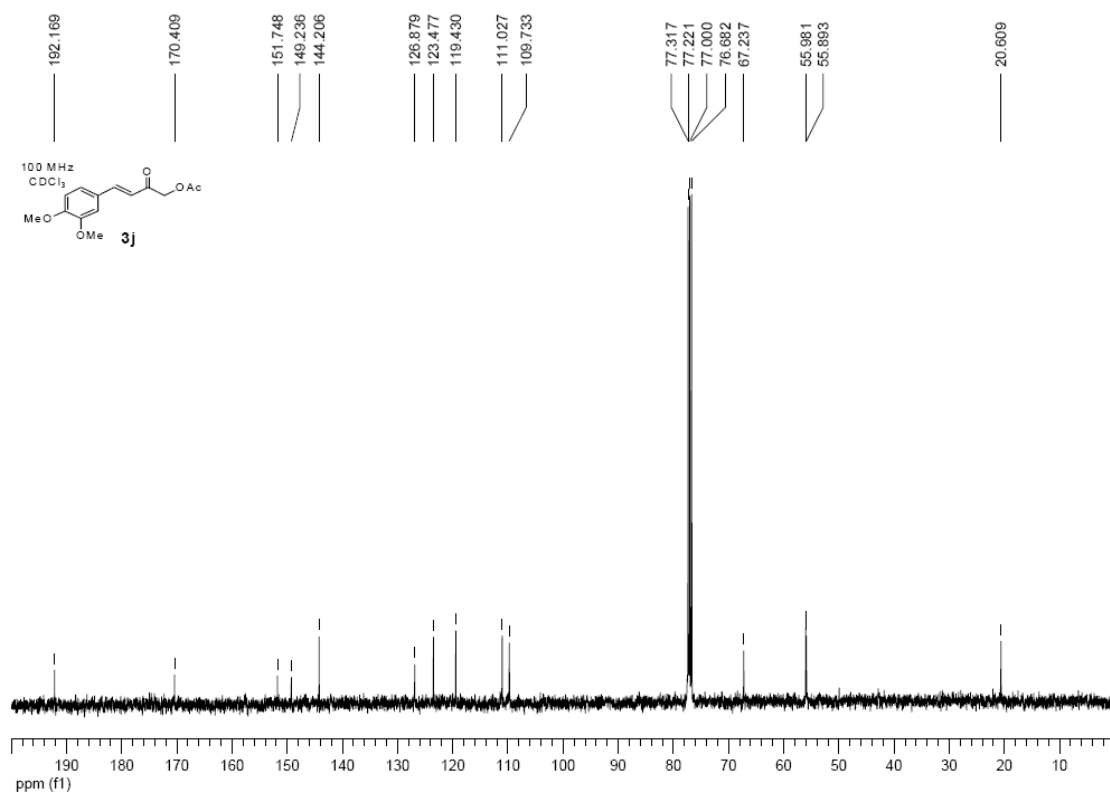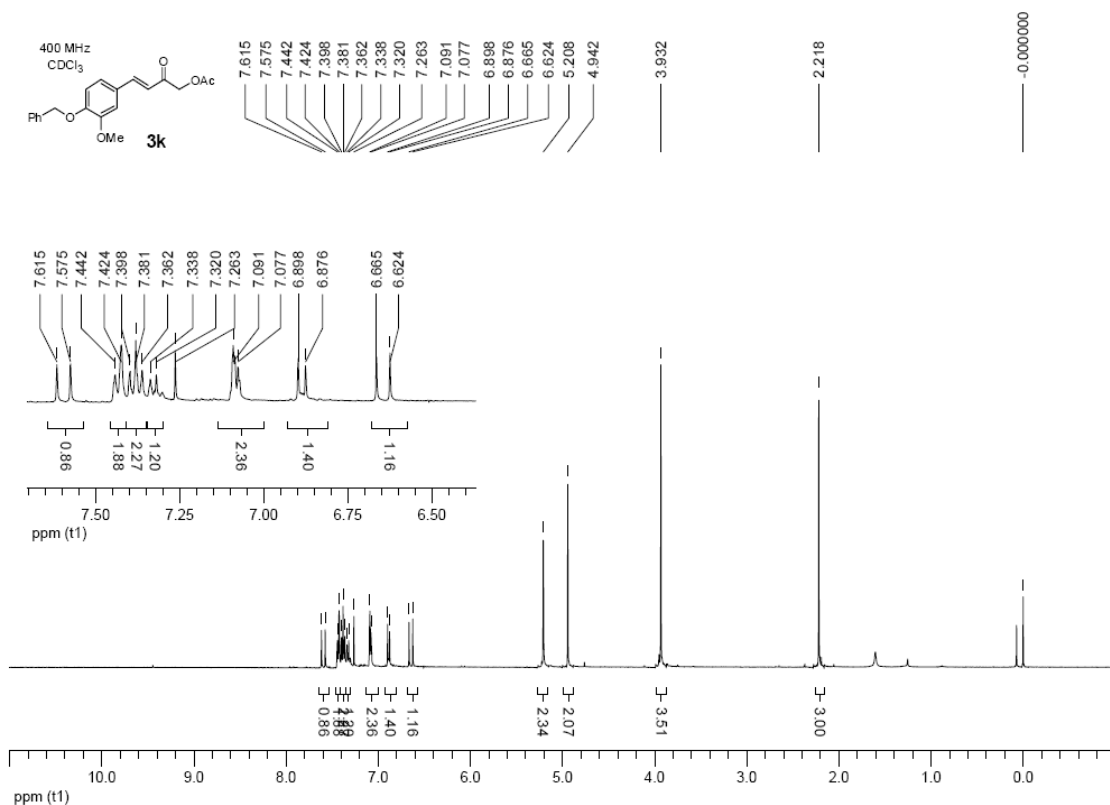

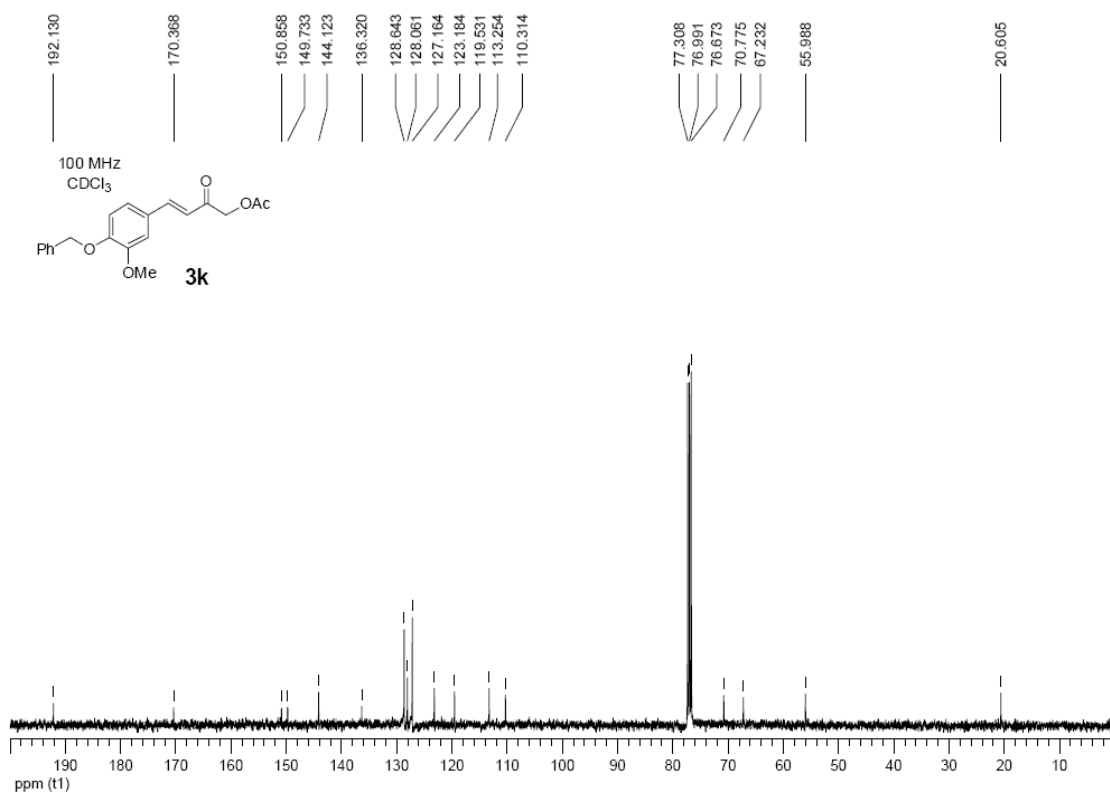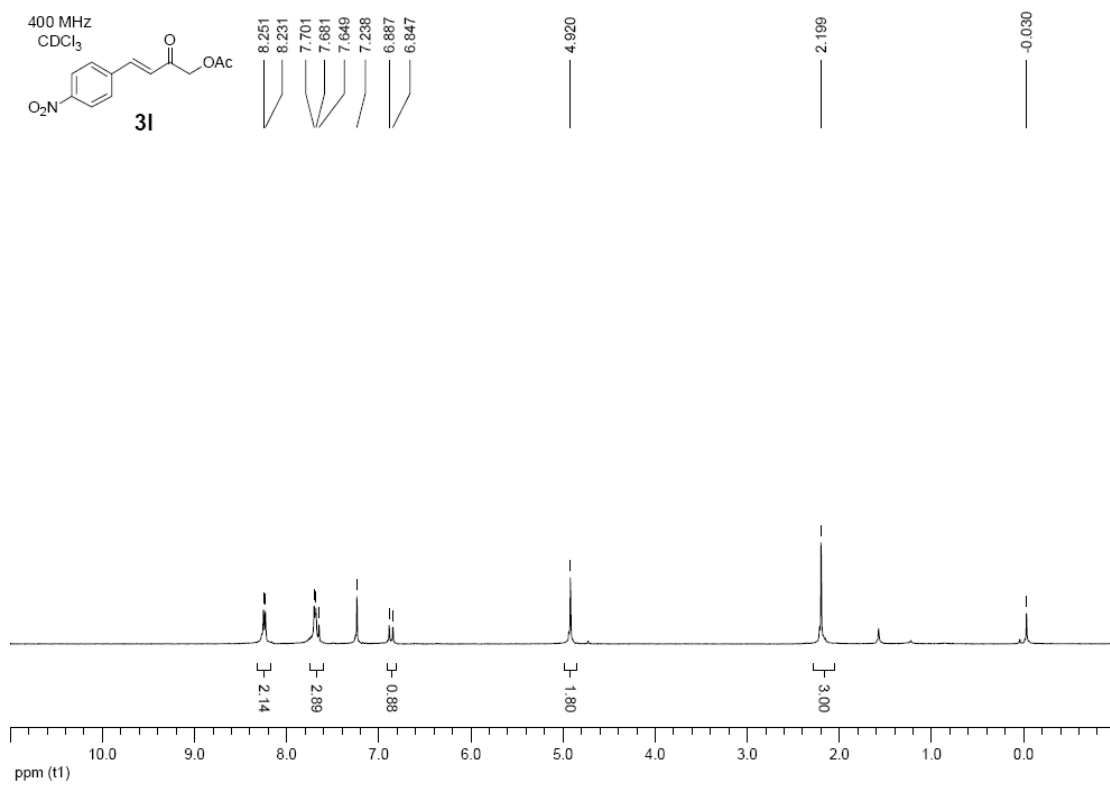

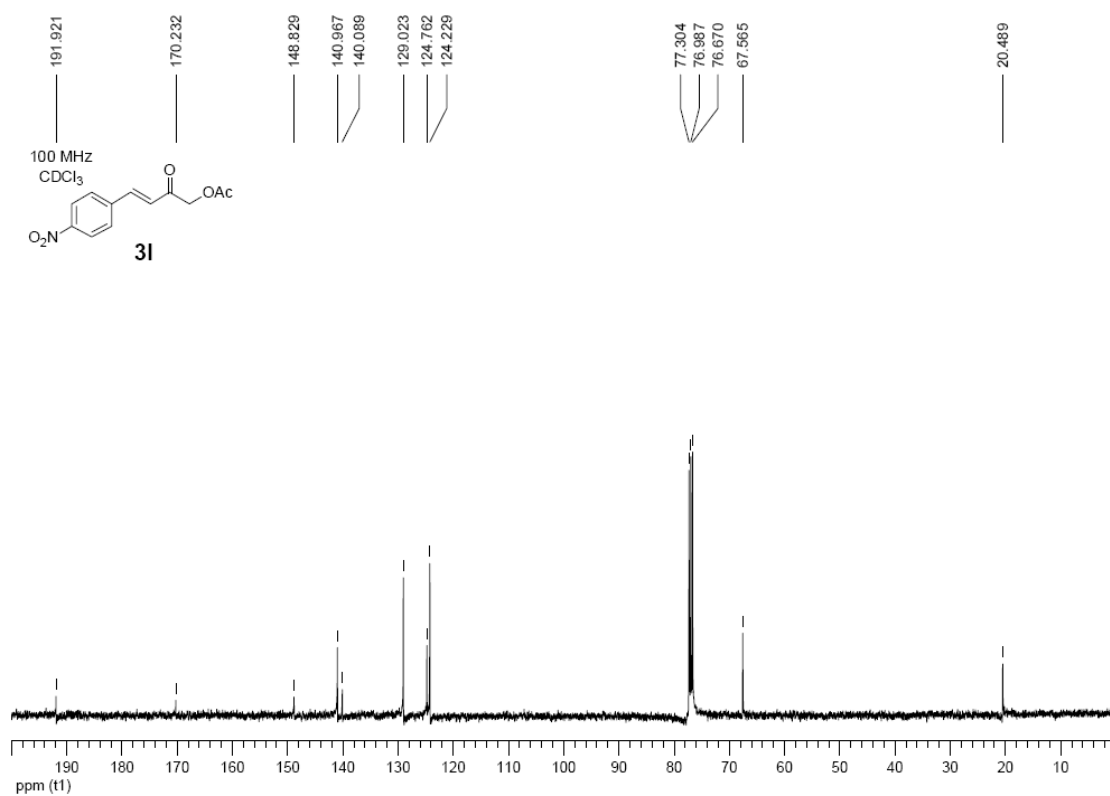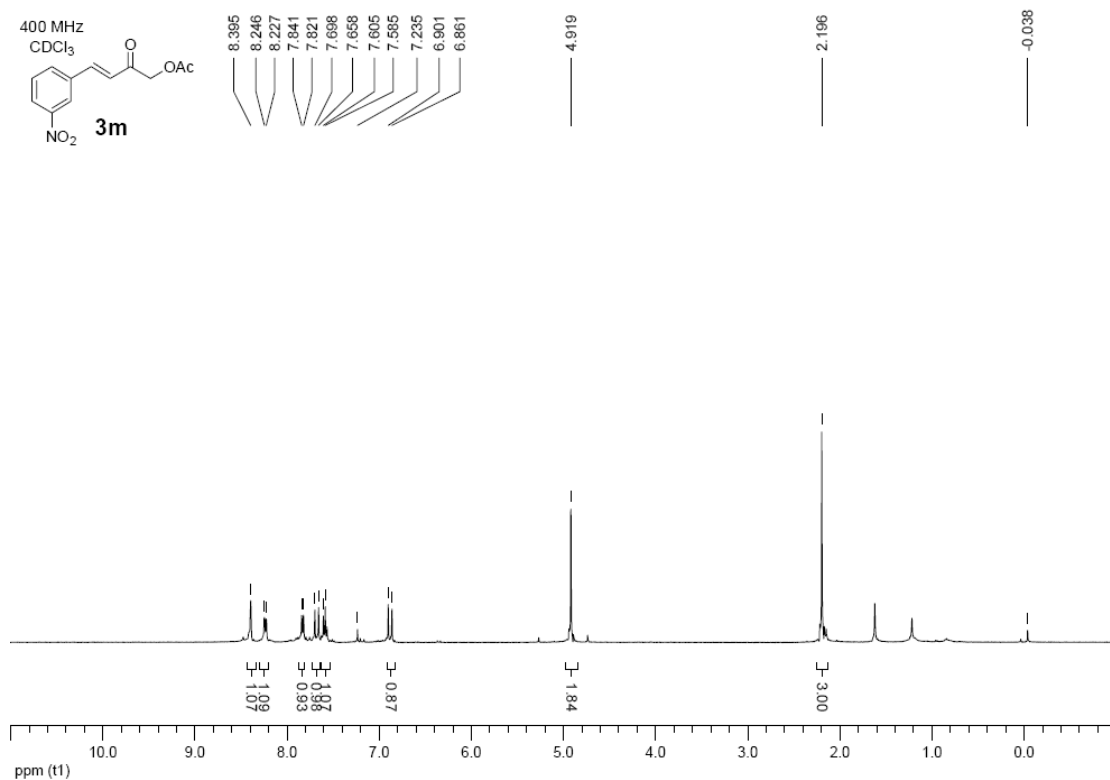



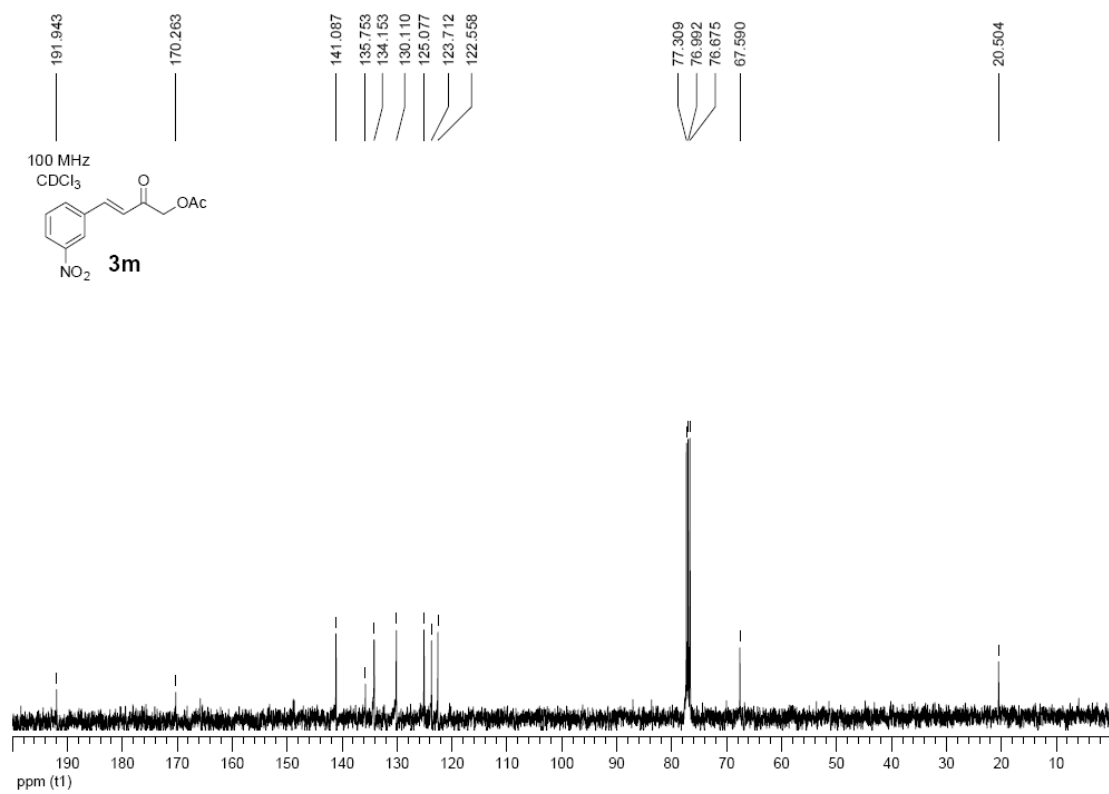

Supplement: c1cc15819h.pdf [file c1cc15819h.pdf]
